# Supplementary material for: Syntheses and exploration of the catalytic activities of organotin(iv) compounds
Source: Royal Society of Chemistry journal article supplement (doi:10.1039/d4dt00646a), 2024-01-01
Supplement: d4dt00646a1.pdf [file d4dt00646a1.pdf]

# Supporting Information

## Syntheses and Exploration of the Catalytic Activities of Organotin(IV) Compounds

**Manish Kumar<sup>a</sup> and Hari Pada Nayek,<sup>\*a</sup>**

*<sup>a</sup>Department of Chemistry & Chemical Biology, Indian Institute of Technology (Indian school of  
Mines), Dhanbad-826004, Jharkhand, India,*

*E-mail: [hpnayek@iitism.ac.in](mailto:hpnayek@iitism.ac.in)*

## Table of contents

| Figure/Table | Content                                                                                                  | Page |
|--------------|----------------------------------------------------------------------------------------------------------|------|
| Figure S1    | FT-IR spectrum of <b>H<sub>2</sub>L</b> .                                                                | S4   |
| Figure S2    | FT-IR spectrum of compound <b>1</b> .                                                                    | S4   |
| Figure S3    | FT-IR spectrum of compound <b>2</b> .                                                                    | S5   |
| Figure S4    | FT-IR spectrum of compound <b>3</b> .                                                                    | S5   |
| Figure S5    | FT-IR spectrum of compound <b>4</b> .                                                                    | S6   |
| Figure S6    | FT-IR spectrum of compound <b>5</b> .                                                                    | S6   |
| Figure S7    | FT-IR spectrum of compound <b>6</b> .                                                                    | S7   |
| Figure S8    | <sup>1</sup> H NMR (400 MHz, DMSO-d <sub>6</sub> ) spectrum of <b>H<sub>2</sub>L</b> .                   | S7   |
| Figure S9    | <sup>13</sup> C{ <sup>1</sup> H} NMR (100 MHz, DMSO-d <sub>6</sub> ) spectrum of <b>H<sub>2</sub>L</b> . | S8   |
| Figure S10   | <sup>1</sup> H NMR (400 MHz, CDCl <sub>3</sub> ) spectrum of compound <b>1</b> .                         | S8   |
| Figure S11   | <sup>13</sup> C{ <sup>1</sup> H} NMR (100 MHz, CDCl <sub>3</sub> ) spectrum of compound <b>1</b> .       | S9   |
| Figure S12   | <sup>119</sup> Sn NMR (149 MHz, CDCl <sub>3</sub> ) spectrum of compound <b>1</b> .                      | S9   |
| Figure S13   | <sup>1</sup> H NMR (400 MHz, CDCl <sub>3</sub> ) spectrum of compound <b>2</b> .                         | S10  |
| Figure S14   | <sup>13</sup> C{ <sup>1</sup> H} NMR (100 MHz, CDCl <sub>3</sub> ) spectrum of compound <b>2</b> .       | S10  |
| Figure S15   | <sup>119</sup> Sn NMR (149 MHz, CDCl <sub>3</sub> ) spectrum of compound <b>2</b> .                      | S11  |
| Figure S16   | <sup>1</sup> H NMR (400 MHz, CDCl <sub>3</sub> ) spectrum of compound <b>3</b> .                         | S11  |
| Figure S17   | <sup>13</sup> C{ <sup>1</sup> H} NMR (100 MHz, CDCl <sub>3</sub> ) spectrum of compound <b>3</b> .       | S12  |
| Figure S18   | <sup>119</sup> Sn NMR (149 MHz, CDCl <sub>3</sub> ) spectrum of compound <b>3</b> .                      | S12  |
| Figure S19   | <sup>1</sup> H NMR (400 MHz, CDCl <sub>3</sub> ) spectrum of compound <b>4</b> .                         | S13  |
| Figure S20   | <sup>13</sup> C{ <sup>1</sup> H} NMR (100 MHz, CDCl <sub>3</sub> ) spectrum of compound <b>4</b> .       | S13  |
| Figure S21   | <sup>119</sup> Sn NMR (149 MHz, CDCl <sub>3</sub> ) spectrum of compound <b>4</b> .                      | S14  |
| Figure S22   | <sup>1</sup> H NMR (400 MHz, CDCl <sub>3</sub> ) spectrum of compound <b>5</b> .                         | S14  |
| Figure S23   | <sup>13</sup> C{ <sup>1</sup> H} NMR (100 MHz, CDCl <sub>3</sub> ) spectrum of compound <b>5</b> .       | S15  |
| Figure S24   | <sup>119</sup> Sn NMR (149 MHz, CDCl <sub>3</sub> ) spectrum of compound <b>5</b> .                      | S15  |
| Figure S25   | <sup>1</sup> H NMR (400 MHz, CDCl <sub>3</sub> ) spectrum of compound <b>6</b> .                         | S16  |
| Figure S26   | <sup>13</sup> C{ <sup>1</sup> H} NMR (100 MHz, CDCl <sub>3</sub> ) spectrum of compound <b>6</b> .       | S16  |
| Figure S27   | <sup>119</sup> Sn NMR (149 MHz, CDCl <sub>3</sub> ) spectrum of compound <b>6</b> .                      | S17  |
| Figure S28   | HRMS (ESI) spectrum of compound <b>1</b> .                                                               | S17  |
| Figure S29   | HRMS (ESI) spectrum of [M+H] <sup>+</sup> ion of compound <b>1</b> .                                     | S18  |
| Figure S30   | ESI-MS spectrum of compound <b>2</b> .                                                                   | S18  |
| Figure S31   | ESI-MS spectrum of compound <b>3</b> .                                                                   | S19  |
| Figure S32   | ESI-MS spectrum of compound <b>4</b> .                                                                   | S19  |
| Figure S33   | HRMS (ESI) spectrum of [M+H] <sup>+</sup> ion of compound <b>4</b> .                                     | S20  |
| Figure S34   | ESI-MS spectrum of compound <b>5</b> .                                                                   | S20  |
| Figure S35   | ESI-MS spectrum of compound <b>6</b> .                                                                   | S21  |
| Table S1     | Single crystal data collection and data refinement parameters for compound <b>1-6</b> .                  | S22  |
| Figure S36   | Packing of <b>1</b> within the unit cell viewed along crystallographic <i>a</i> axis.                    | S23  |
| Figure S37   | Packing of <b>2</b> within the unit cell viewed along crystallographic <i>a</i> axis.                    | S23  |

|            |                                                                                                                                                                                            |     |
|------------|--------------------------------------------------------------------------------------------------------------------------------------------------------------------------------------------|-----|
| Figure S38 | Packing of <b>3</b> within the unit cell viewed along crystallographic <i>a</i> axis.                                                                                                      | S24 |
| Figure S39 | Packing of <b>4</b> within the unit cell viewed along crystallographic <i>a</i> axis.                                                                                                      | S24 |
| Figure S40 | Packing of <b>5</b> within the unit cell viewed along crystallographic <i>b</i> axis.                                                                                                      | S25 |
| Figure S41 | Packing of <b>6</b> within the unit cell viewed along crystallographic <i>a</i> axis.                                                                                                      | S25 |
| Table S2   | Isolated yield of 1,2- disubstituted benzimidazoles.                                                                                                                                       | S26 |
| Table S3   | Characterization of isolated 1,2-disubstituted benzimidazoles.                                                                                                                             | S28 |
| Figure S42 | <sup>1</sup> H NMR (400 MHz, CDCl <sub>3</sub> ) spectrum of <b>2a</b> .                                                                                                                   | S31 |
| Figure S43 | <sup>13</sup> C{ <sup>1</sup> H} NMR (100 MHz, CDCl <sub>3</sub> ) spectrum of <b>2a</b> .                                                                                                 | S31 |
| Figure S44 | <sup>1</sup> H NMR (400 MHz, CDCl <sub>3</sub> ) spectrum of <b>2b</b> .                                                                                                                   | S32 |
| Figure S45 | <sup>13</sup> C{ <sup>1</sup> H} NMR (100 MHz, CDCl <sub>3</sub> ) spectrum of <b>2b</b> .                                                                                                 | S32 |
| Figure S46 | <sup>1</sup> H NMR (400 MHz, CDCl <sub>3</sub> ) spectrum of <b>2c</b> .                                                                                                                   | S33 |
| Figure S47 | <sup>13</sup> C{ <sup>1</sup> H} NMR (100 MHz, CDCl <sub>3</sub> ) spectrum of <b>2c</b> .                                                                                                 | S33 |
| Figure S48 | <sup>1</sup> H NMR (400 MHz, CDCl <sub>3</sub> ) spectrum of <b>2d</b> .                                                                                                                   | S34 |
| Figure S49 | <sup>13</sup> C{ <sup>1</sup> H} NMR (100 MHz, CDCl <sub>3</sub> ) spectrum of <b>2d</b> .                                                                                                 | S34 |
| Figure S50 | <sup>1</sup> H NMR (400 MHz, CDCl <sub>3</sub> ) spectrum of <b>2e</b> .                                                                                                                   | S35 |
| Figure S51 | <sup>13</sup> C{ <sup>1</sup> H} NMR (100 MHz, CDCl <sub>3</sub> ) spectrum of <b>2e</b> .                                                                                                 | S35 |
| Figure S52 | <sup>1</sup> H NMR (400 MHz, CDCl <sub>3</sub> ) spectrum of <b>2f</b> .                                                                                                                   | S36 |
| Figure S53 | <sup>13</sup> C{ <sup>1</sup> H} NMR (100 MHz, CDCl <sub>3</sub> ) spectrum of <b>2f</b> .                                                                                                 | S36 |
| Figure S54 | <sup>1</sup> H NMR (400 MHz, CDCl <sub>3</sub> ) spectrum of <b>2g</b> .                                                                                                                   | S37 |
| Figure S55 | <sup>13</sup> C{ <sup>1</sup> H} (100 MHz, CDCl <sub>3</sub> ) NMR spectrum of <b>2g</b> .                                                                                                 | S37 |
| Figure S56 | <sup>1</sup> H NMR (400 MHz, CDCl <sub>3</sub> ) spectrum of <b>2h</b> .                                                                                                                   | S38 |
| Figure S57 | <sup>13</sup> C{ <sup>1</sup> H} NMR (100 MHz, CDCl <sub>3</sub> ) spectrum of <b>2h</b> .                                                                                                 | S38 |
| Figure S58 | <sup>1</sup> H NMR (400 MHz, DMSO-d <sub>6</sub> ) spectrum of <b>2i</b> .                                                                                                                 | S39 |
| Figure S59 | <sup>13</sup> C{ <sup>1</sup> H} NMR (100 MHz, DMSO-d <sub>6</sub> ) spectrum of <b>2i</b> .                                                                                               | S39 |
| Figure S60 | <sup>1</sup> H NMR (400 MHz, CDCl <sub>3</sub> ) spectrum of <b>2j</b> .                                                                                                                   | S40 |
| Figure S61 | <sup>13</sup> C{ <sup>1</sup> H} NMR (100 MHz, CDCl <sub>3</sub> ) spectrum of <b>2j</b> .                                                                                                 | S40 |
| Figure S62 | <sup>1</sup> H NMR (400 MHz, CDCl <sub>3</sub> ) spectrum of <b>2k</b> .                                                                                                                   | S41 |
| Figure S63 | <sup>13</sup> C{ <sup>1</sup> H} NMR (100 MHz, CDCl <sub>3</sub> ) spectrum of <b>2k</b> .                                                                                                 | S41 |
| Figure S64 | <sup>1</sup> H NMR (400 MHz, CDCl <sub>3</sub> ) spectrum of <b>2l</b> .                                                                                                                   | S42 |
| Figure S65 | <sup>13</sup> C{ <sup>1</sup> H} NMR (100 MHz, CDCl <sub>3</sub> ) spectrum of <b>2l</b> .                                                                                                 | S42 |
| Figure S66 | <sup>1</sup> H NMR spectrum of the reaction mixture obtained by reacting <i>o</i> -phenyldiamine and benzaldehyde in the absence of the catalyst at 60 °C in CDCl <sub>3</sub> .           |     |
| Figure S67 | <sup>1</sup> H NMR spectrum of the reaction mixture obtained by reacting <i>o</i> -phenyldiamine and benzaldehyde in presence of the pro ligand <b>H3L</b> at 60 °C in CDCl <sub>3</sub> . |     |
| Figure S68 | <sup>1</sup> H NMR spectrum of the reaction mixture obtained by reacting <i>o</i> -phenyldiamine and benzaldehyde in presence of compound <b>1</b> at 60 °C in CDCl <sub>3</sub> .         |     |

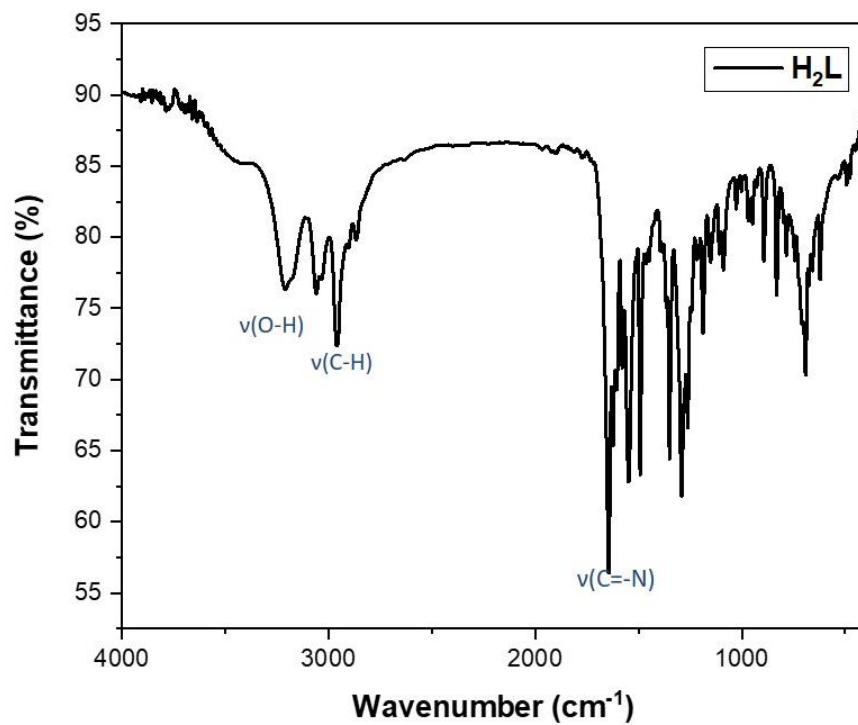

**Figure S1:** FT-IR spectrum of H<sub>2</sub>L.

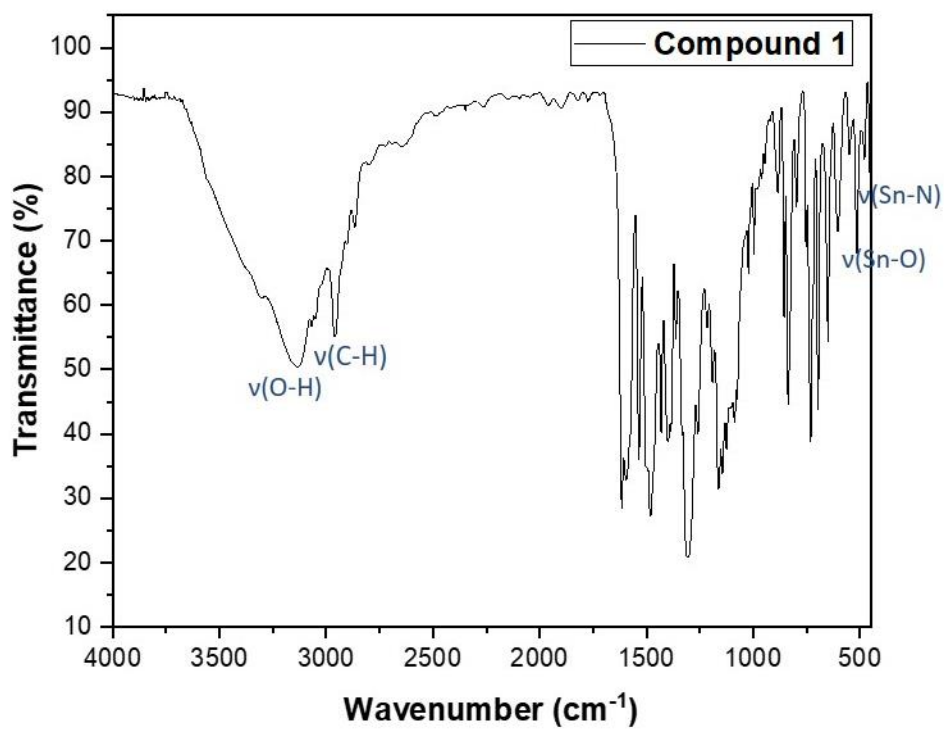

**Figure S2:** FT-IR spectrum of compound 1.

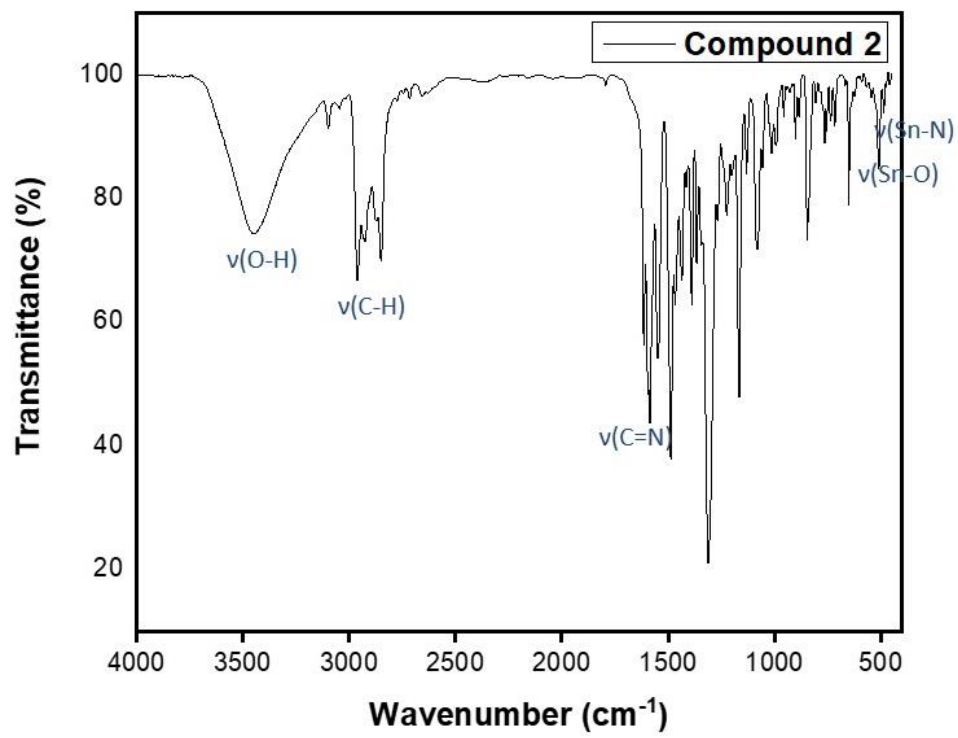

Figure S3: FT-IR spectrum of compound 2.

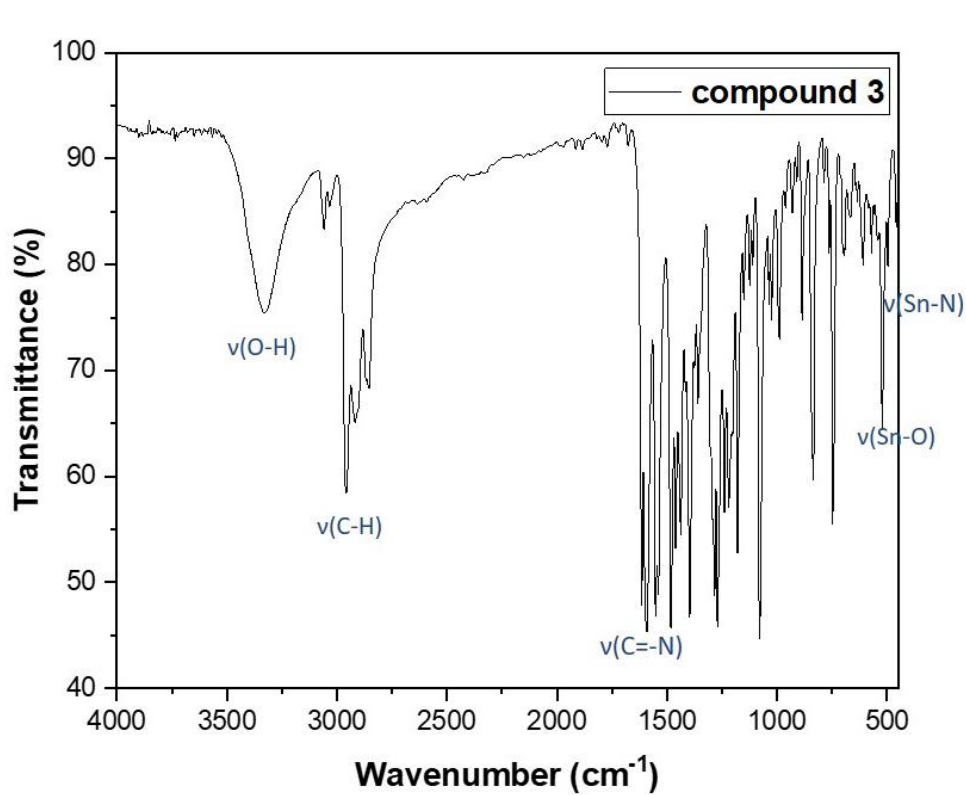

Figure S4: FT-IR spectrum of compound 3.

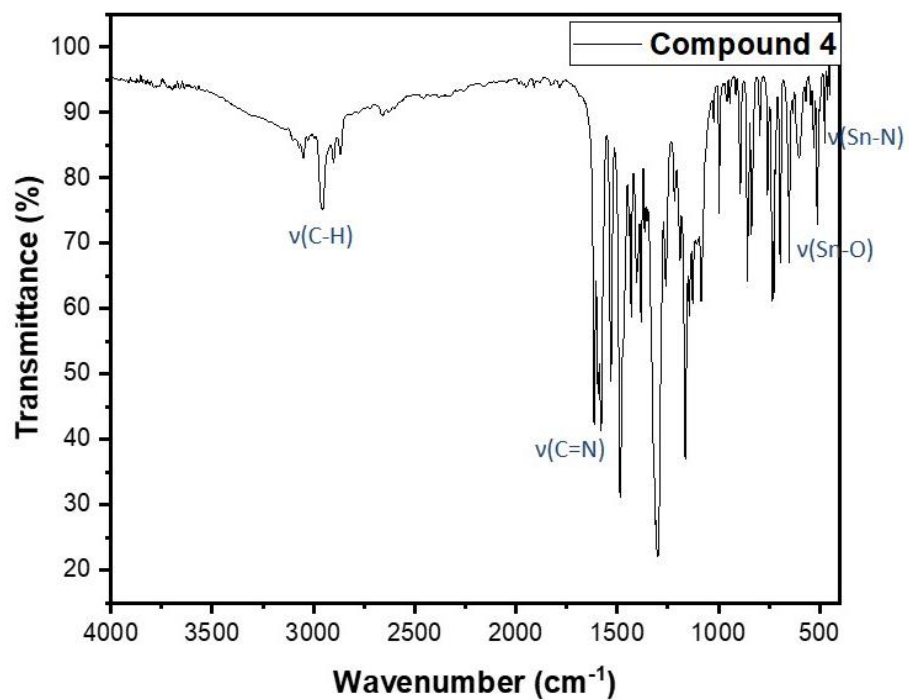

**Figure S5:** FT-IR spectrum of compound 4.

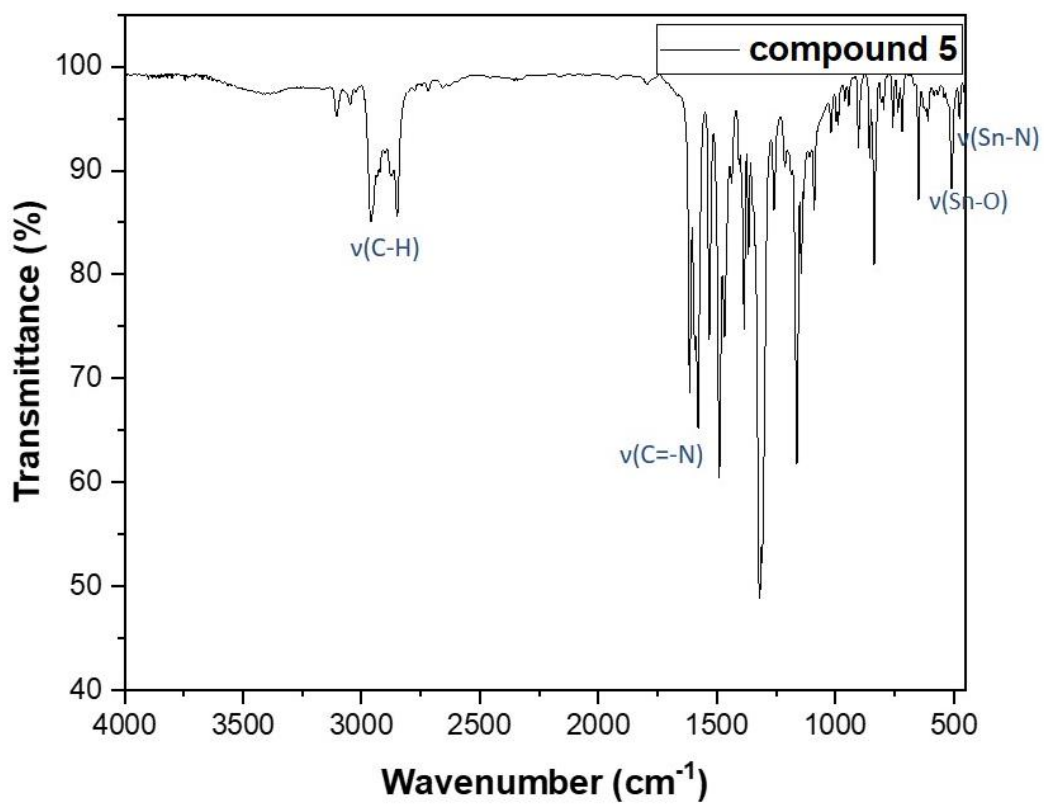

**Figure S6:** FT-IR spectrum of compound 5.

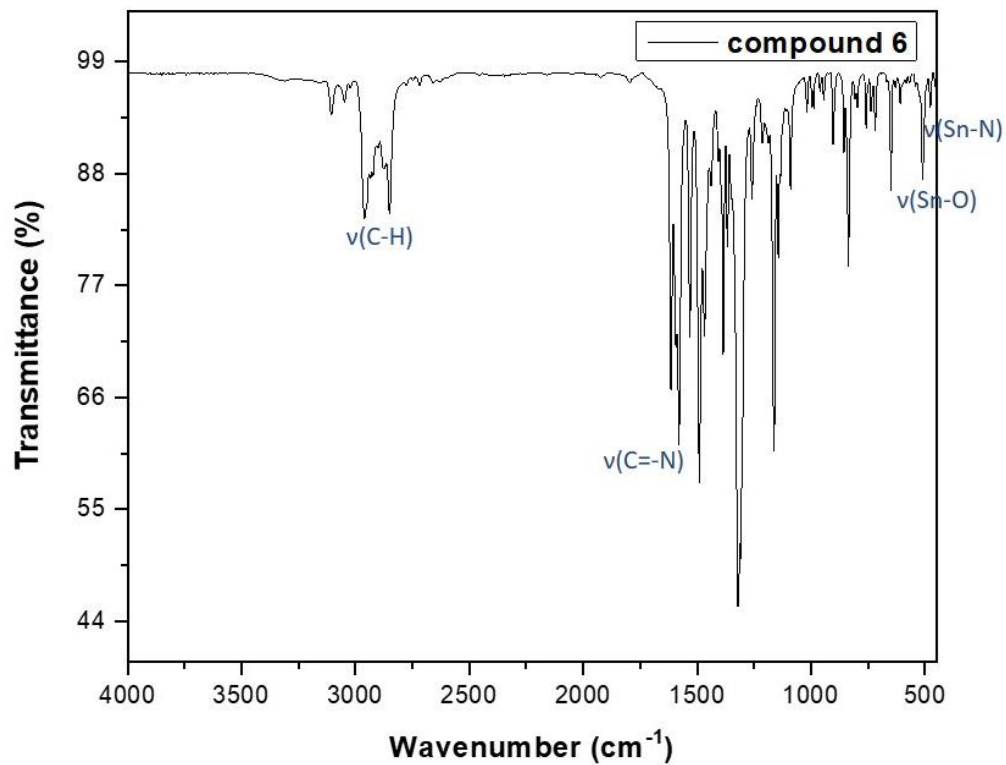

Figure S7: FT-IR spectrum of compound 6.

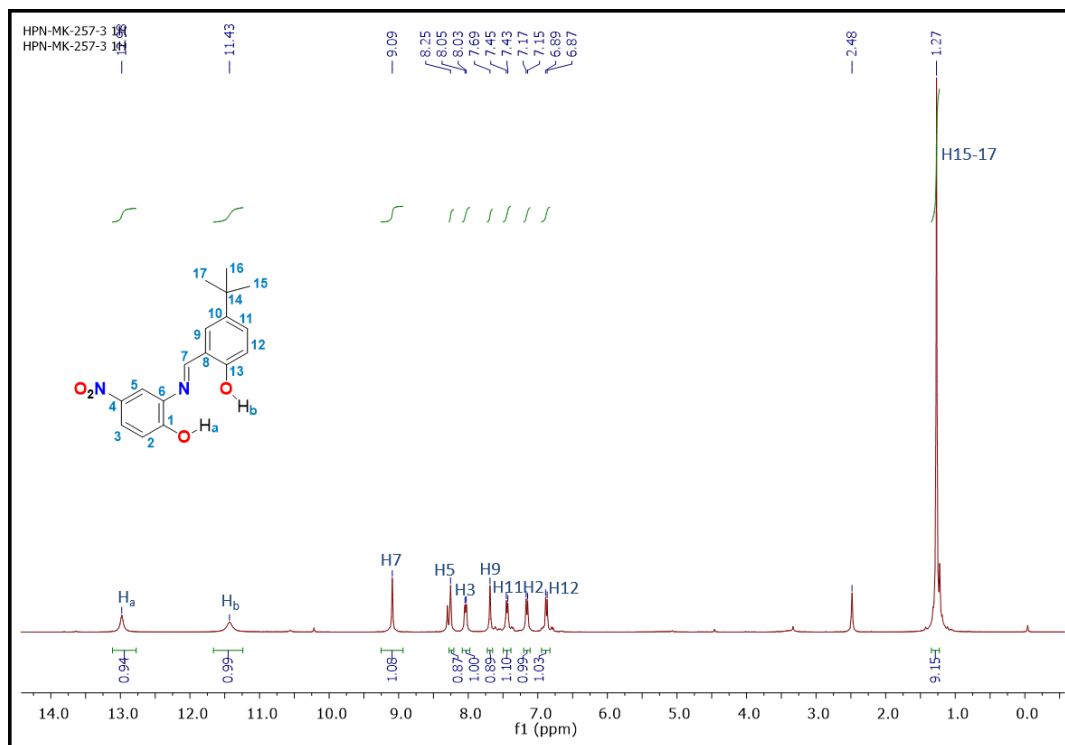

Figure S8: <sup>1</sup>H NMR (400 MHz, DMSO-d<sub>6</sub>) spectrum of H<sub>2</sub>L.

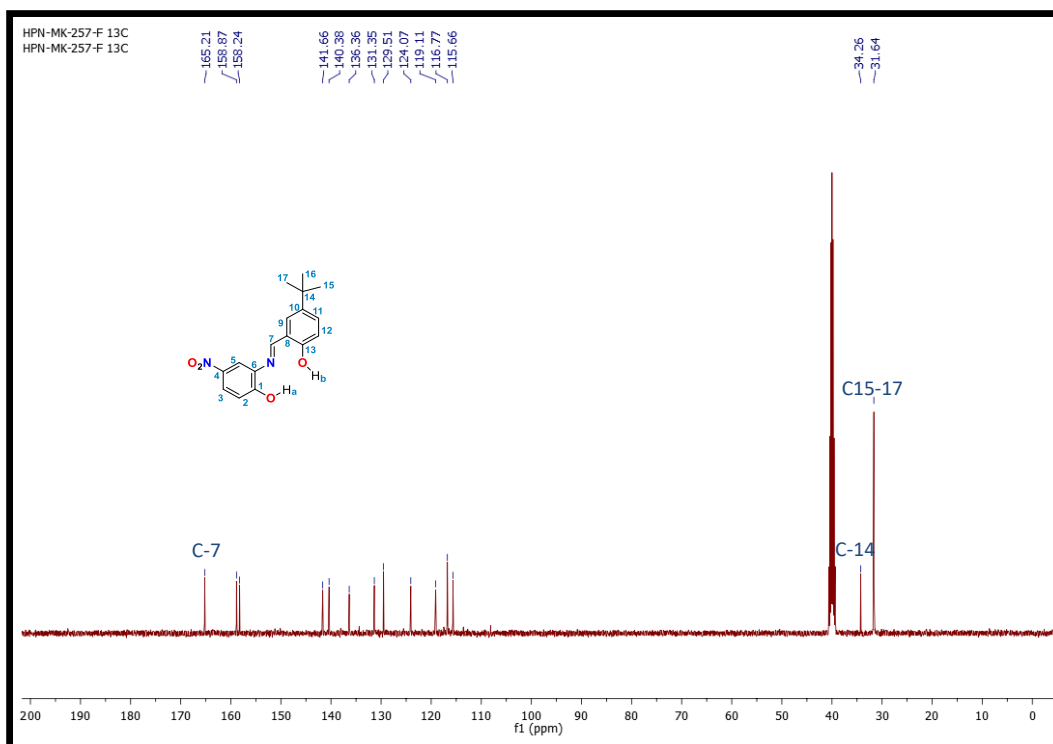

**Figure S9:**  $^{13}\text{C}(^1\text{H})$  NMR (100 MHz,  $\text{DMSO-}d_6$ ) spectrum of **H<sub>2</sub>L**.

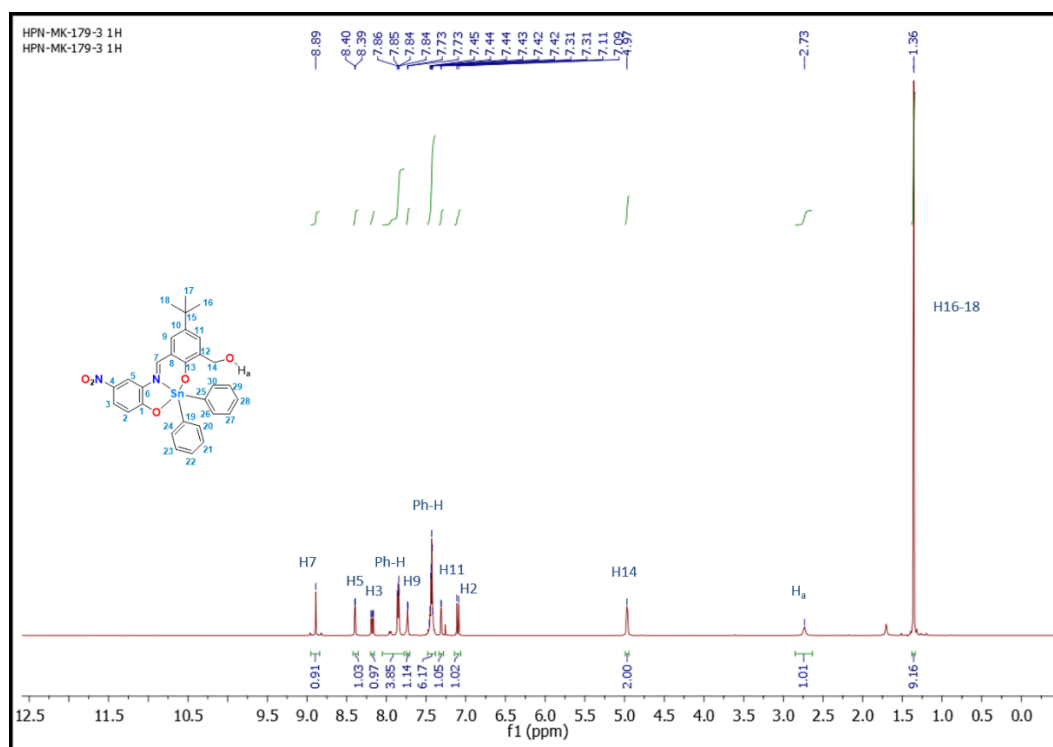

**Figure S10:**  $^1\text{H}$  NMR (400 MHz,  $\text{CDCl}_3$ ) spectrum of compound **1**.



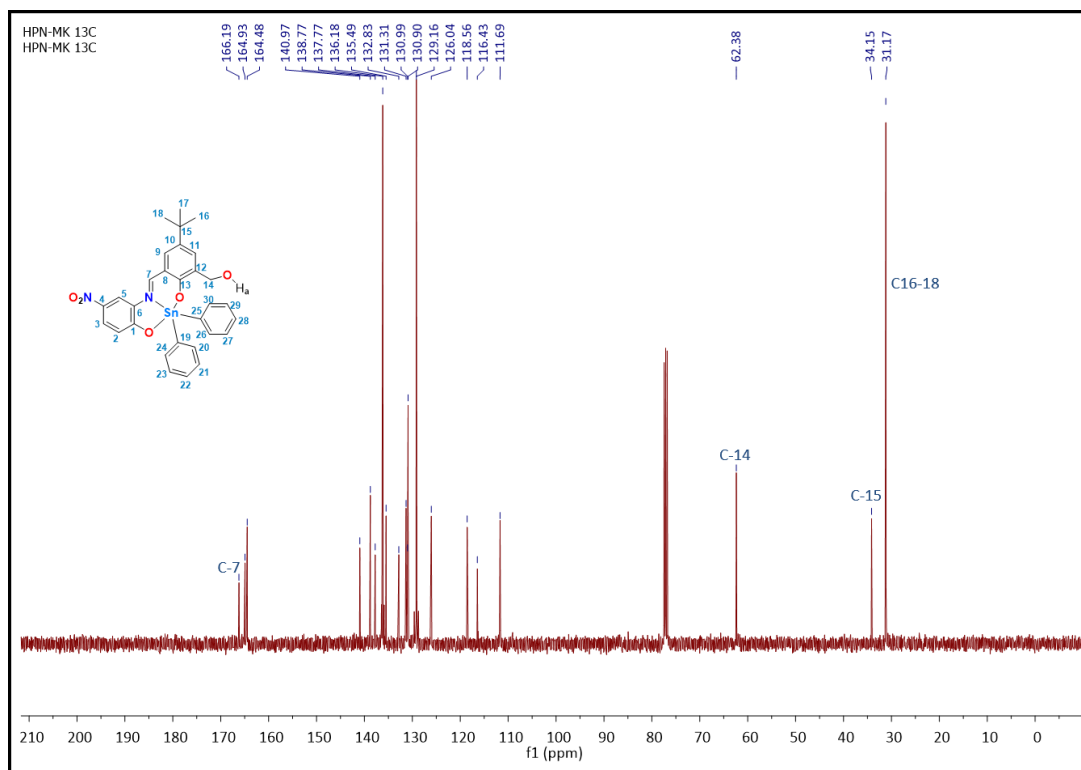

**Figure S11:**  $^{13}\text{C}\{^1\text{H}\}$  NMR (100 MHz,  $\text{CDCl}_3$ ) spectrum of compound **1**.

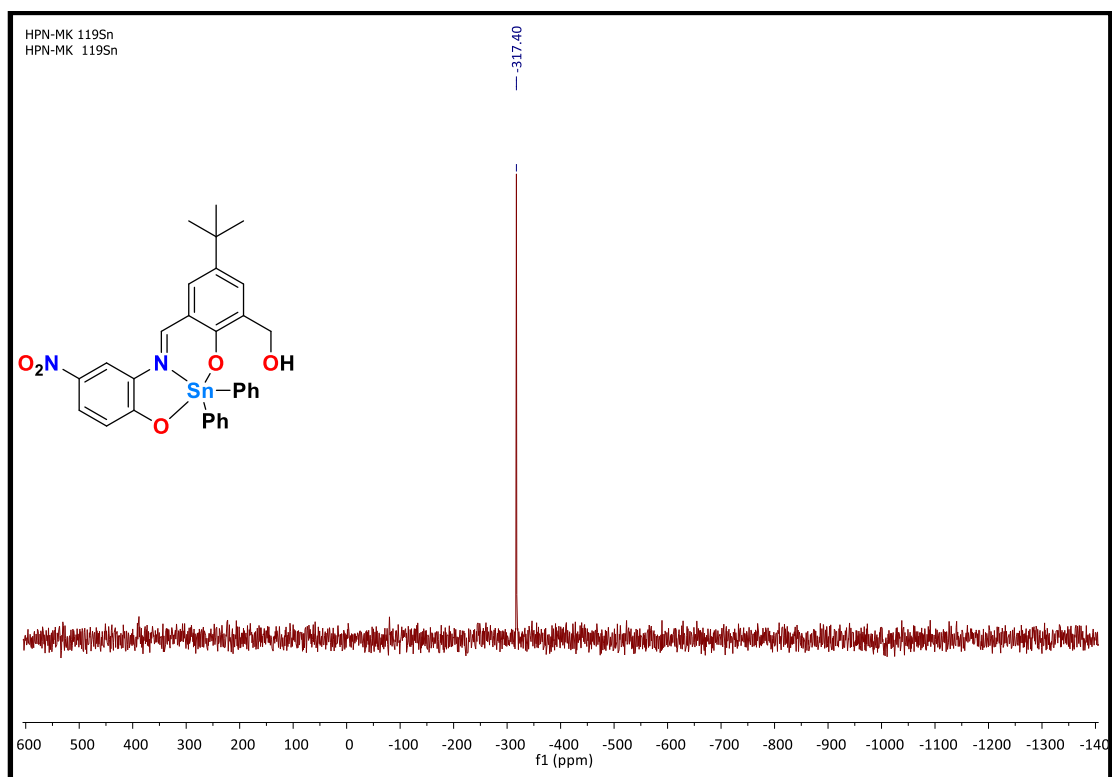

**Figure S12:**  $^{119}\text{Sn}$  NMR (149 MHz,  $\text{CDCl}_3$ ) spectrum of compound **1**.

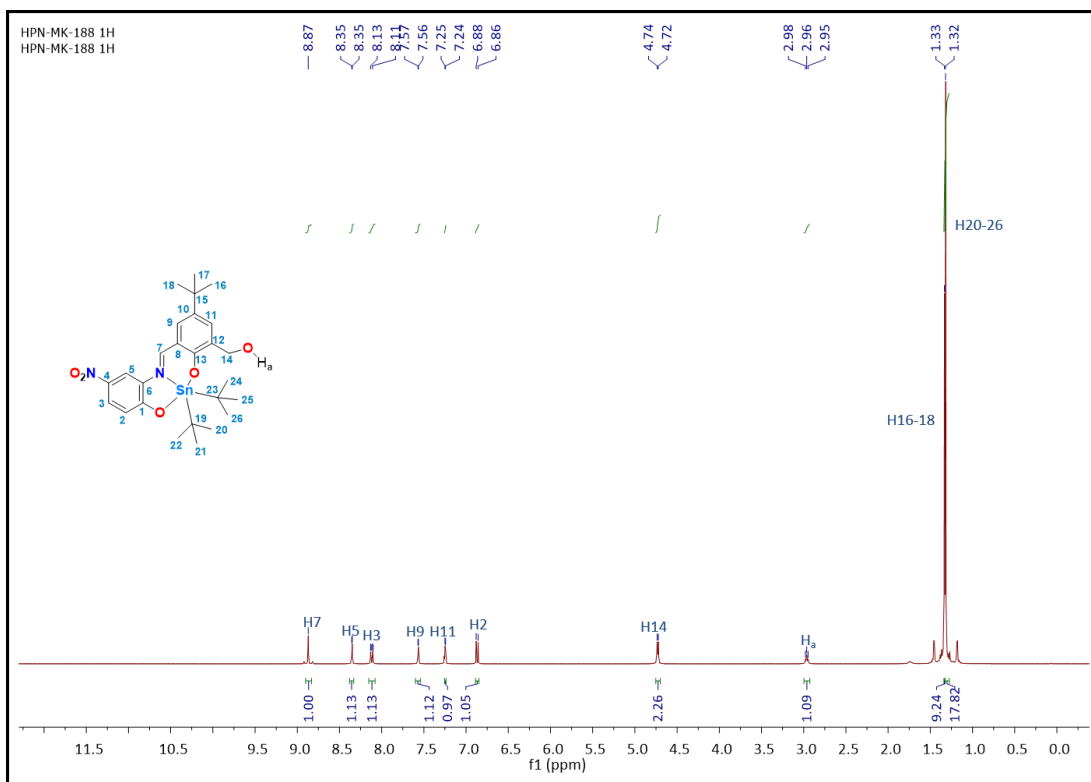

**Figure S13:**  $^1\text{H}$  NMR (400 MHz,  $\text{CDCl}_3$ ) spectrum of compound **2**.

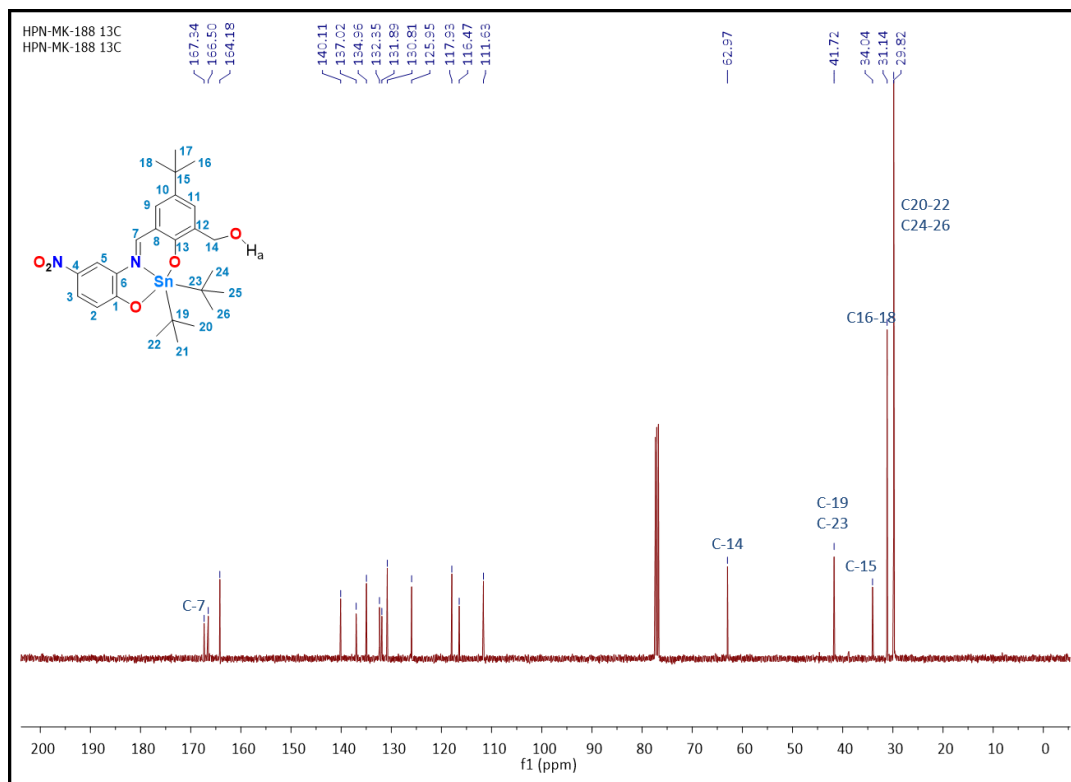

**Figure S14:**  $^{13}\text{C}\{^1\text{H}\}$  NMR (100 MHz,  $\text{CDCl}_3$ ) spectrum of compound **2**.

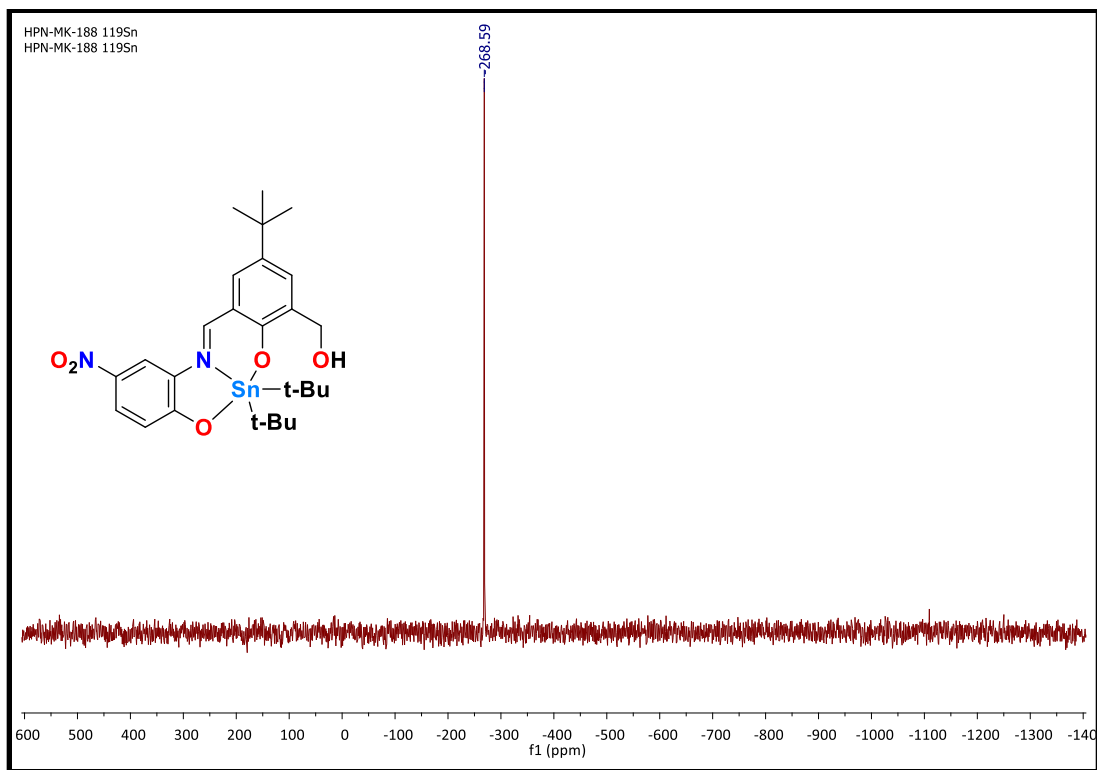

Figure S15:  $^{119}\text{Sn}$  NMR (149 MHz,  $\text{CDCl}_3$ ) spectrum of compound **2**.

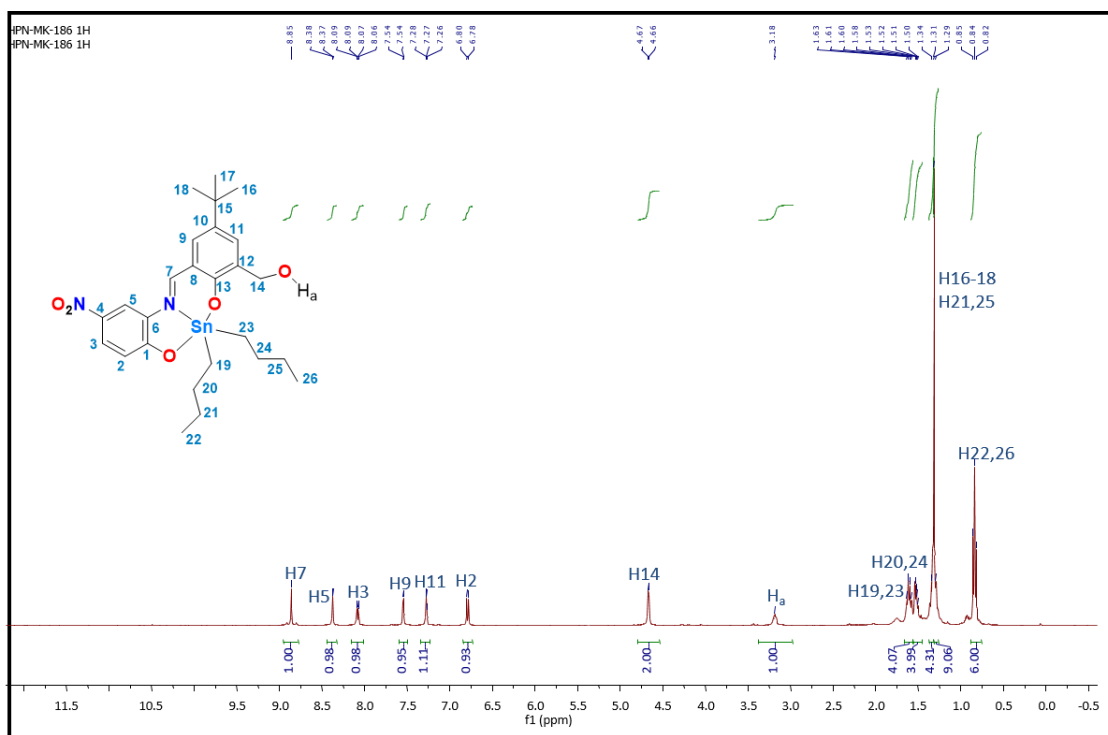

Figure S16:  $^1\text{H}$  NMR (400 MHz,  $\text{CDCl}_3$ ) spectrum of compound **3**.

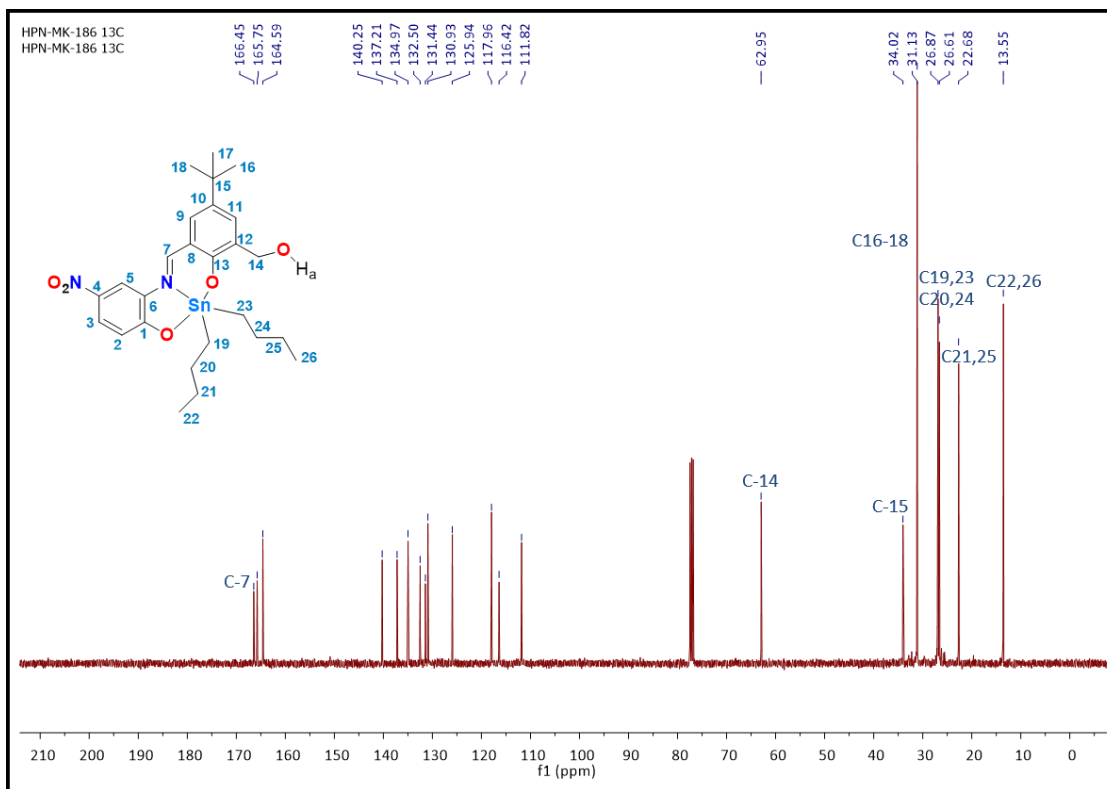

**Figure S17:**  $^{13}\text{C}\{^1\text{H}\}$  NMR (100 MHz,  $\text{CDCl}_3$ ) spectrum of compound **3**.

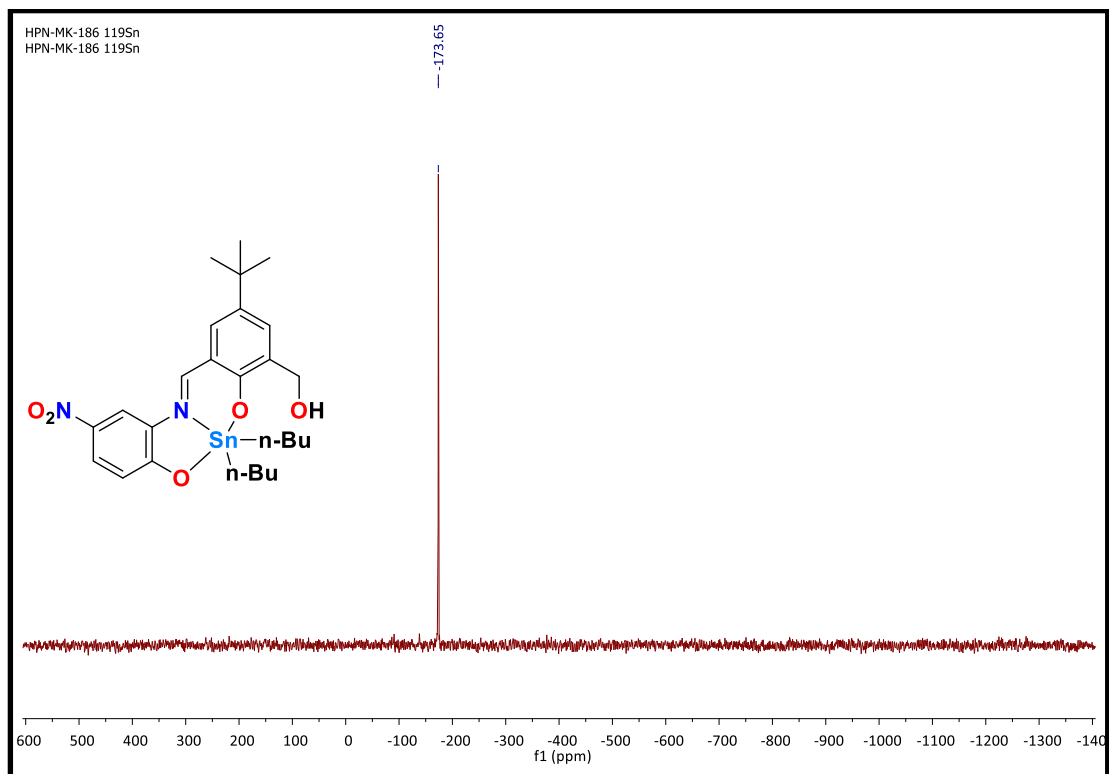

**Figure S18:**  $^{119}\text{Sn}$  NMR (149 MHz,  $\text{CDCl}_3$ ) spectrum of compound **3**.

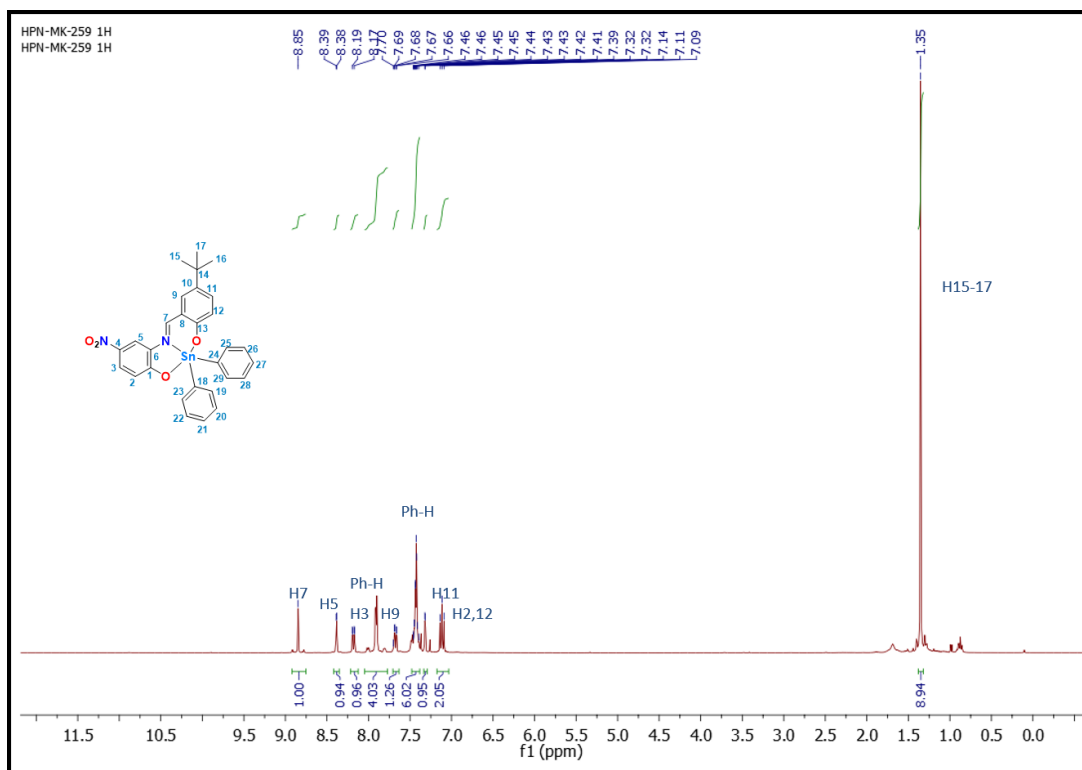

**Figure S19:**  $^1\text{H}$  NMR (400 MHz,  $\text{CDCl}_3$ ) spectrum of compound 4.

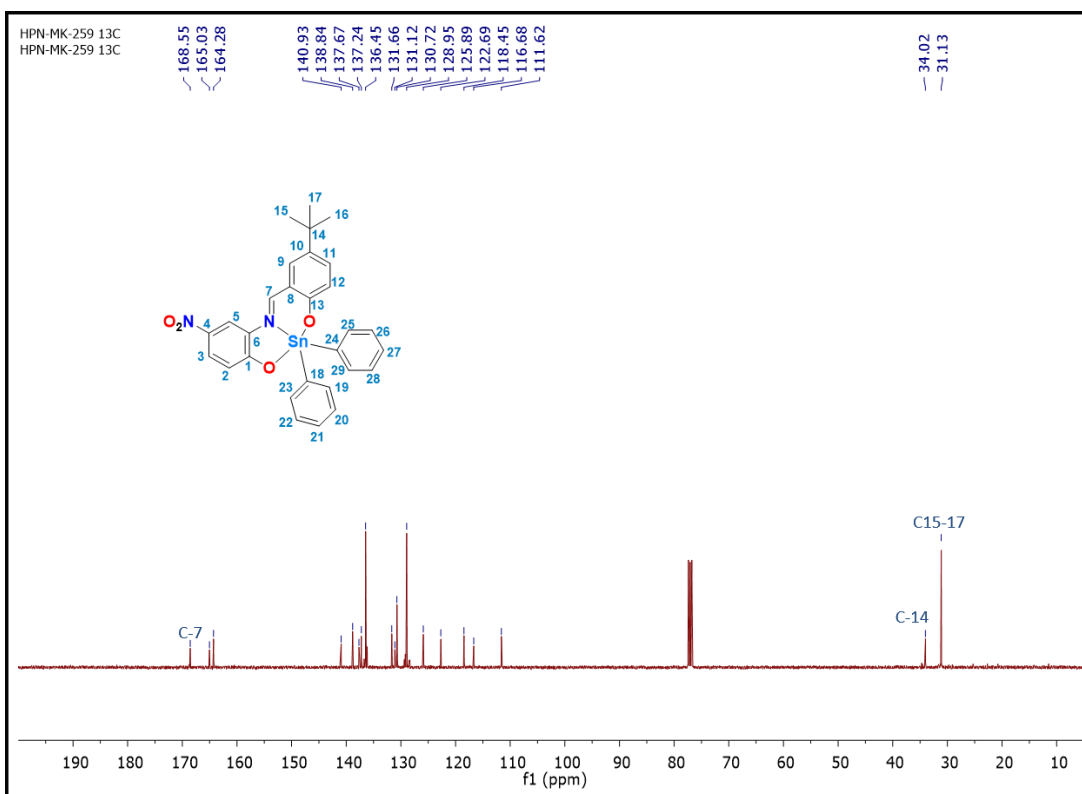

**Figure S20:**  $^{13}\text{C}\{^1\text{H}\}$  NMR (100 MHz,  $\text{CDCl}_3$ ) spectrum of compound 4.

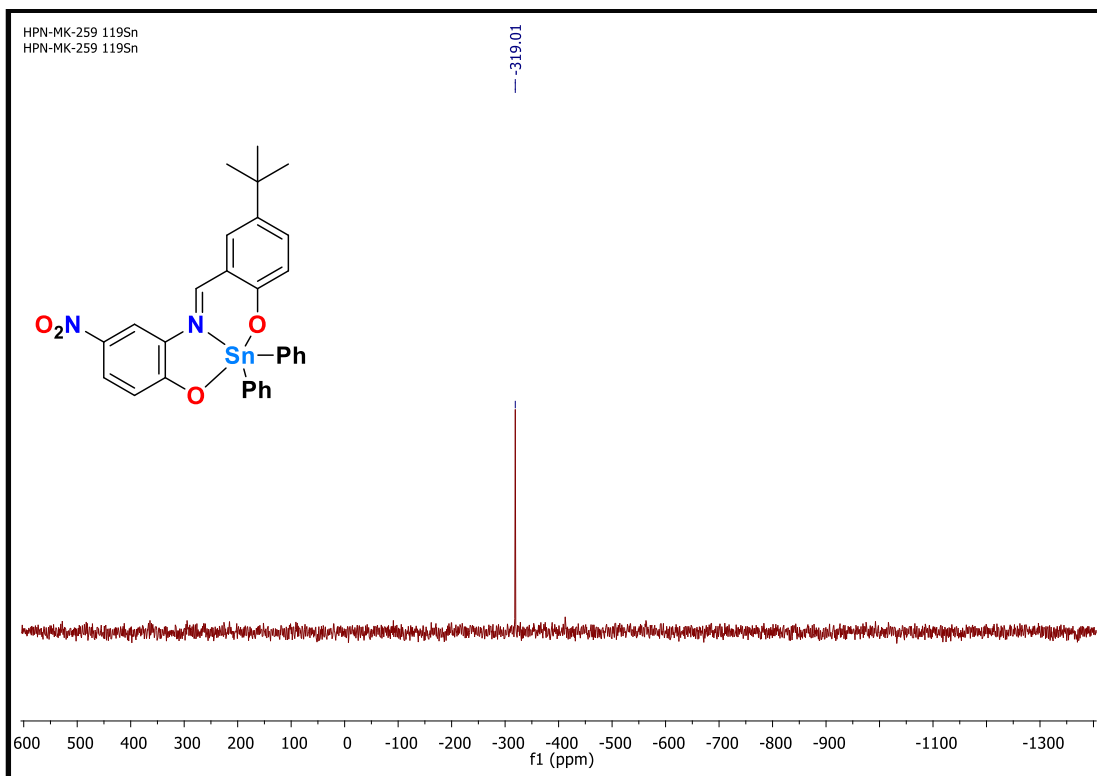

**Figure S21:** <sup>119</sup>Sn NMR (149 MHz, CDCl<sub>3</sub>) spectrum of compound 4.

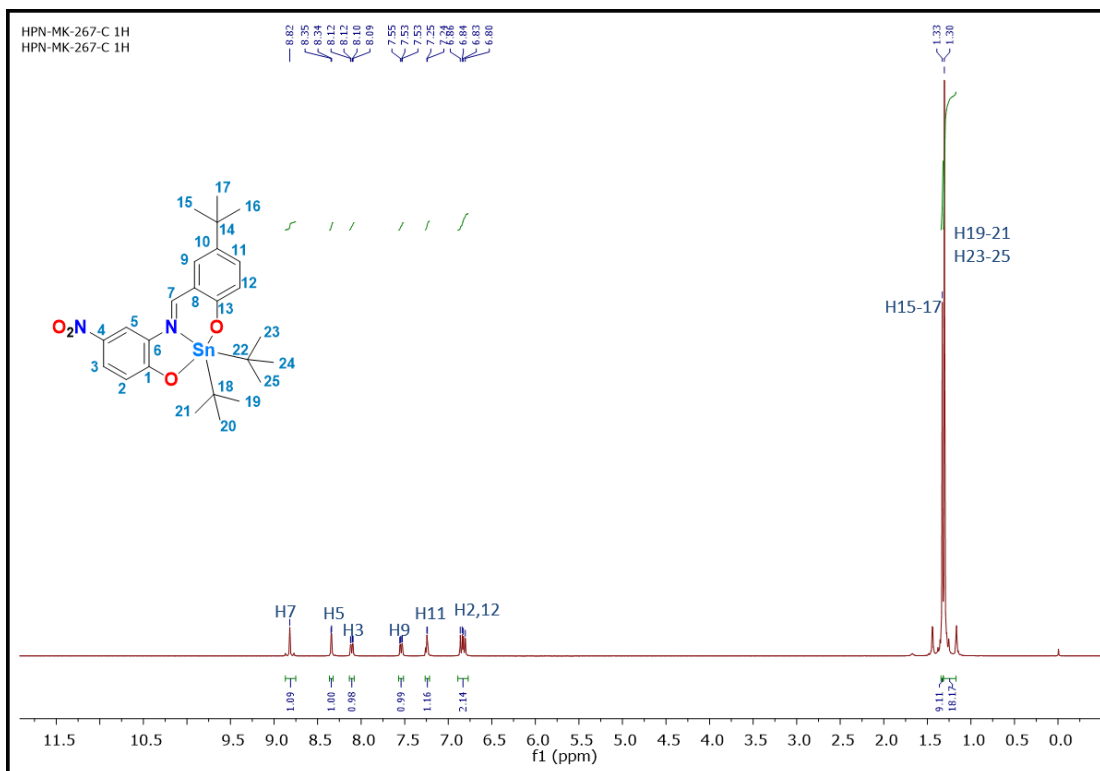

**Figure S22:** <sup>1</sup>H NMR (400 MHz, CDCl<sub>3</sub>) spectrum of compound 5.

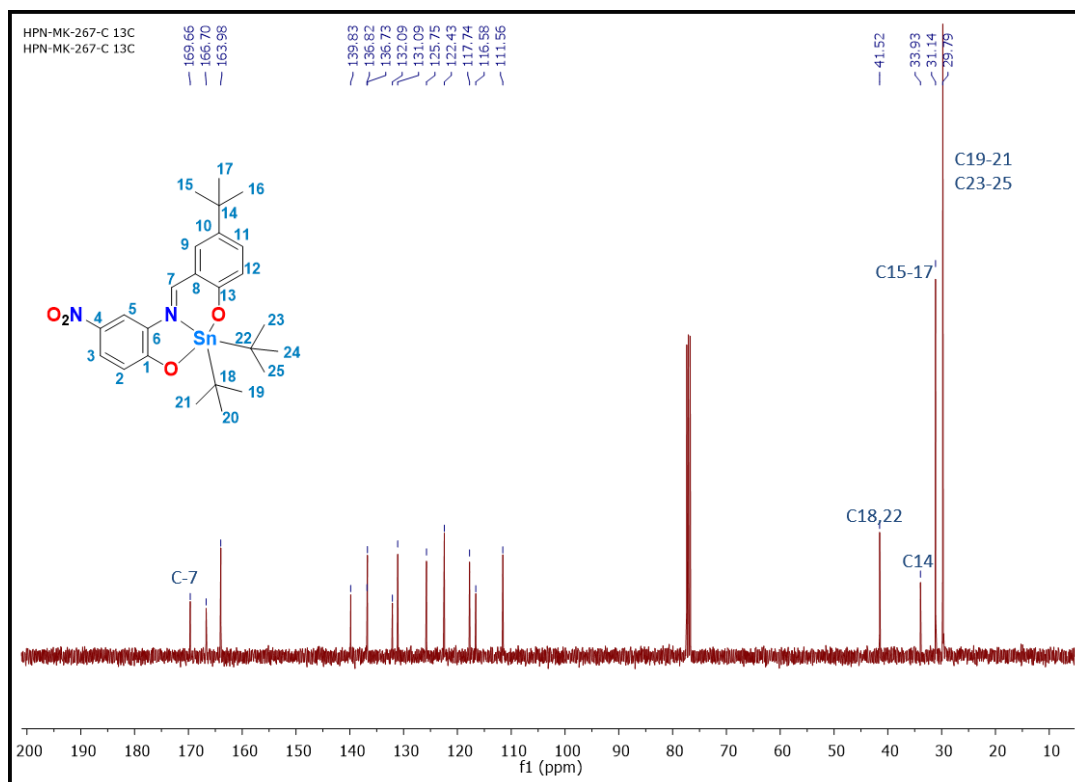

**Figure S23:**  $^{13}\text{C}\{^1\text{H}\}$  NMR (100 MHz,  $\text{CDCl}_3$ ) spectrum of compound **5**.

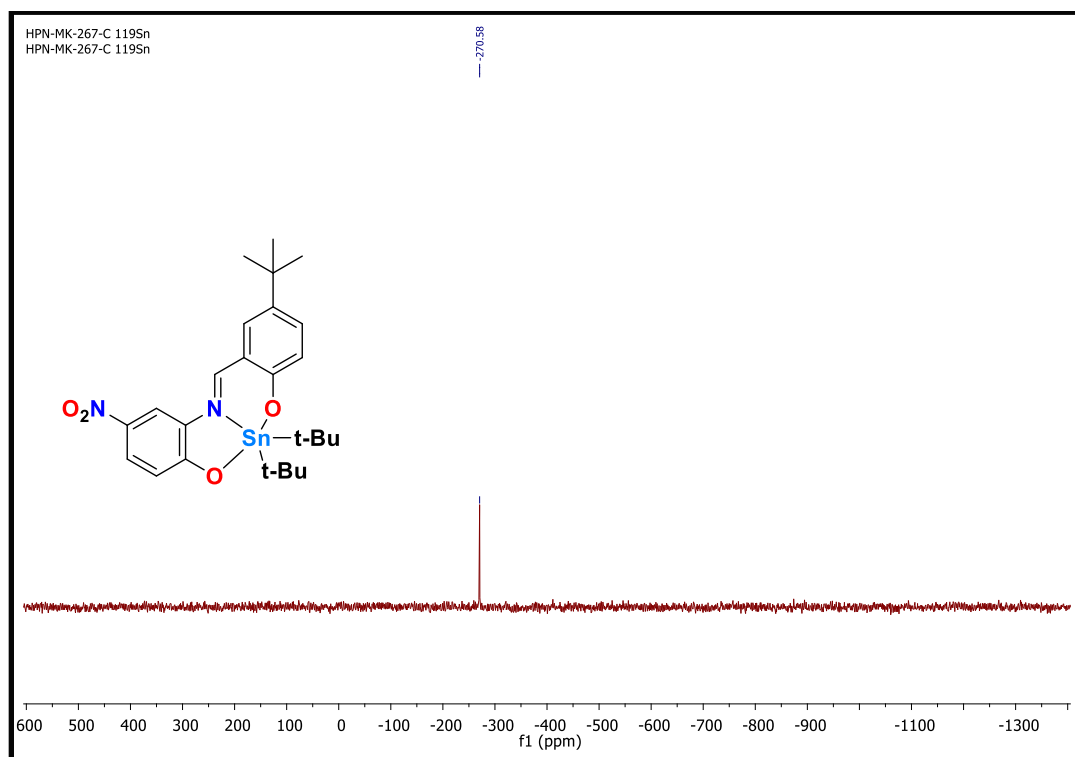

**Figure S24:**  $^{119}\text{Sn}$  NMR (149 MHz,  $\text{CDCl}_3$ ) spectrum of compound **5**.

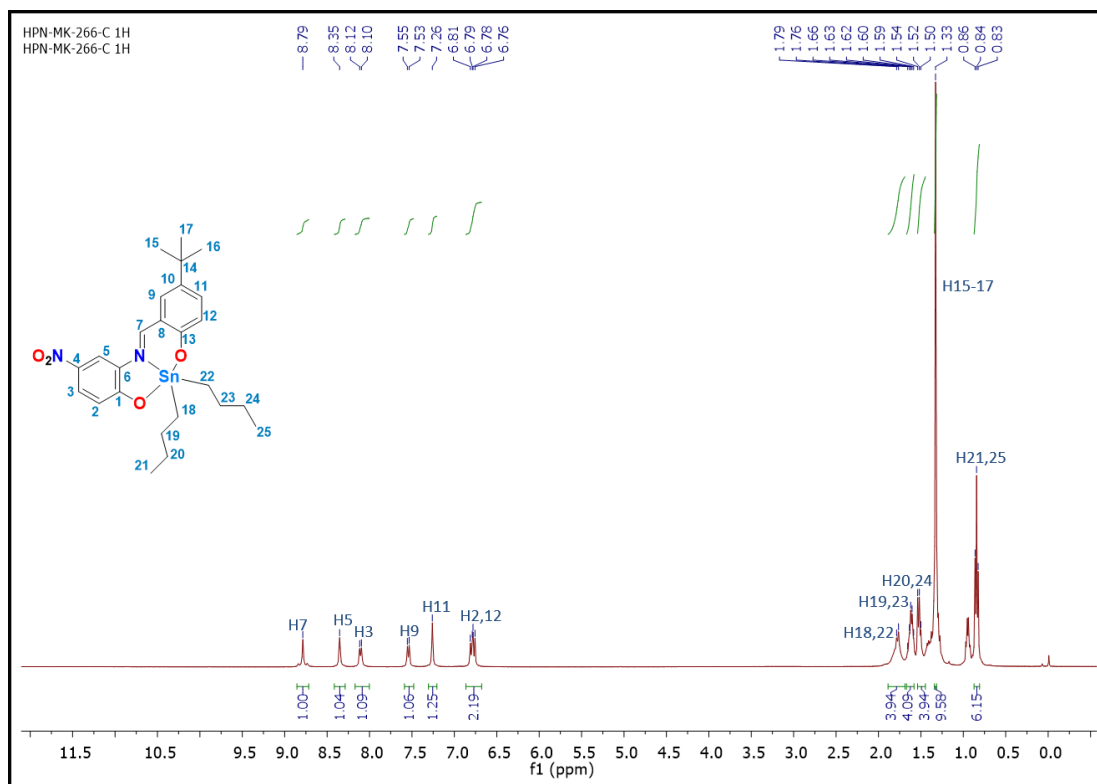

**Figure S25:**  $^1\text{H}$  NMR (400 MHz,  $\text{CDCl}_3$ ) spectrum of compound **6**.

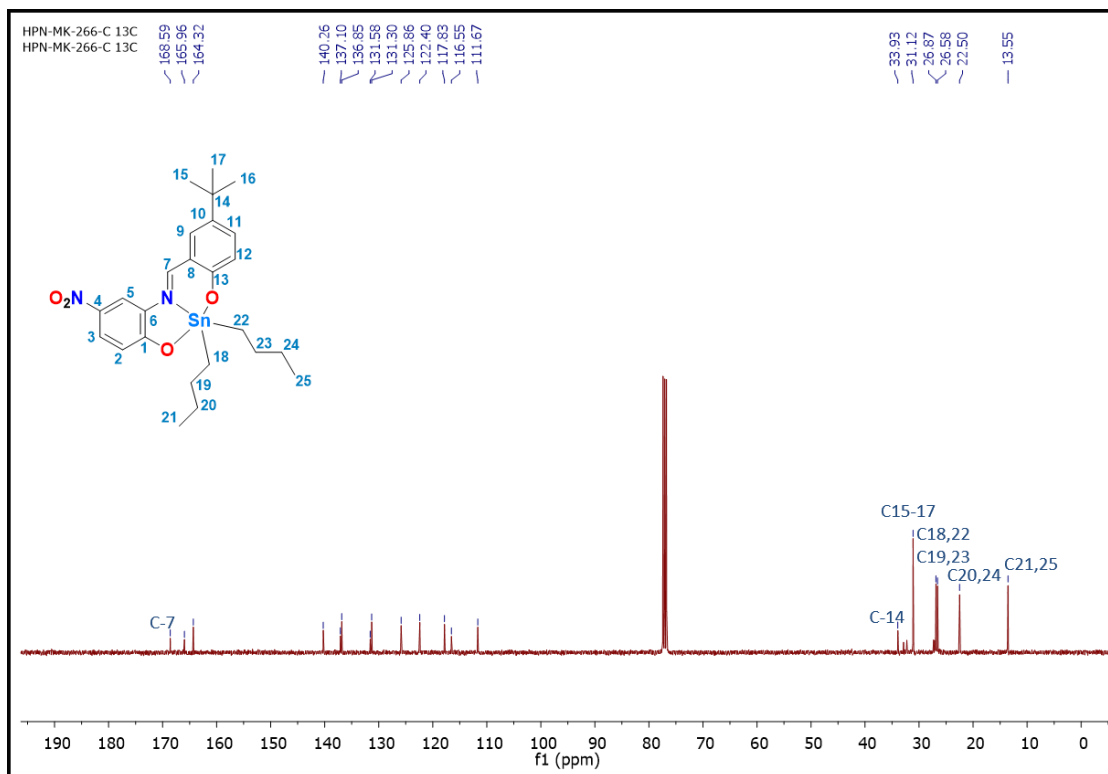

**Figure S26:**  $^{13}\text{C}\{^1\text{H}\}$  NMR (100 MHz,  $\text{CDCl}_3$ ) spectrum of compound **6**.



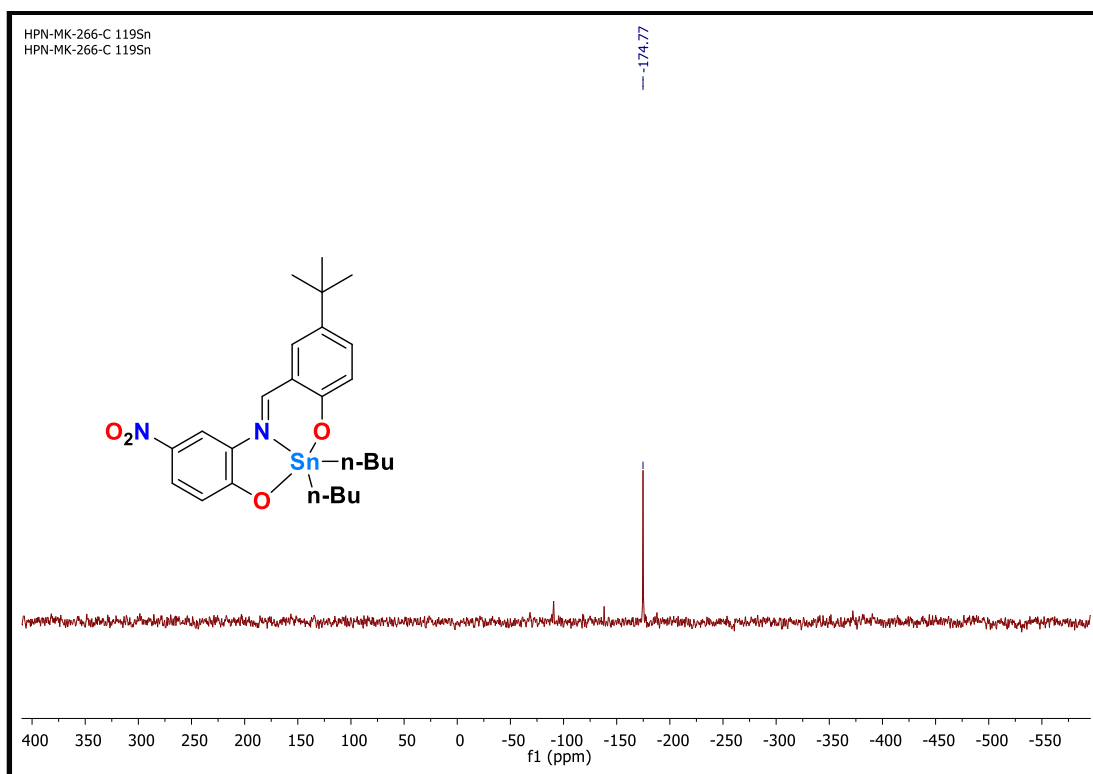

Figure S27:  $^{119}\text{Sn}$  NMR (149 MHz,  $\text{CDCl}_3$ ) spectrum of compound 6.

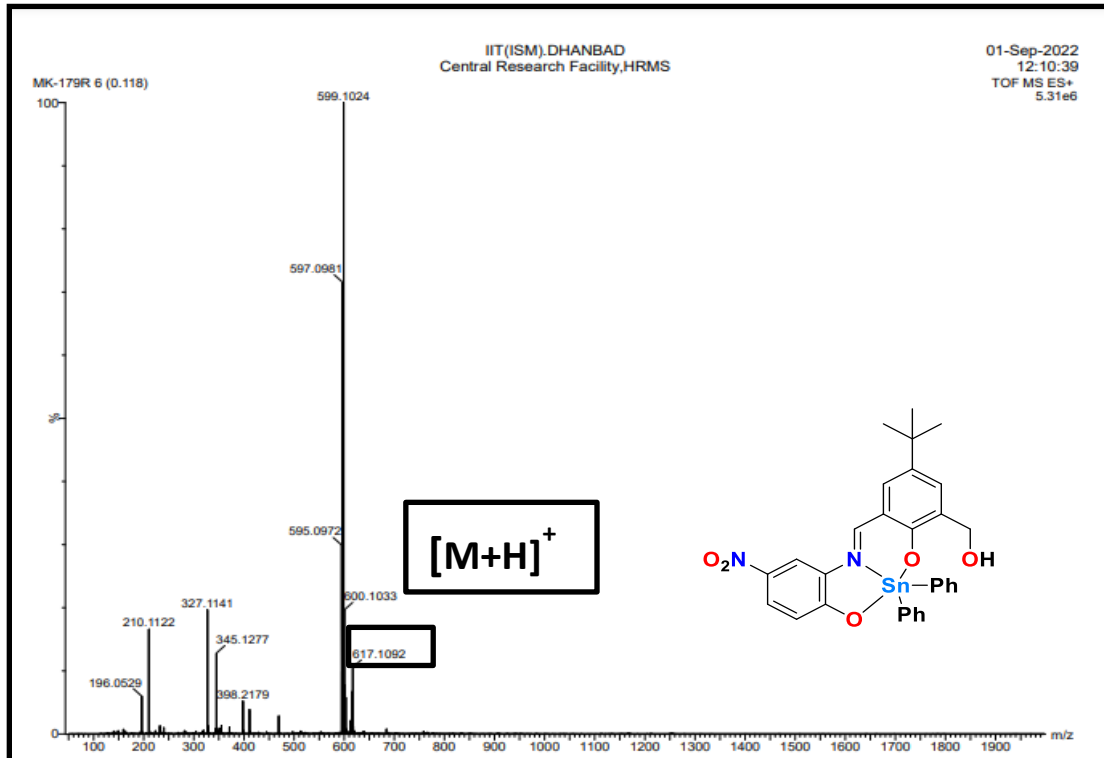

Figure S28: HRMS (ESI) spectrum of compound 1.

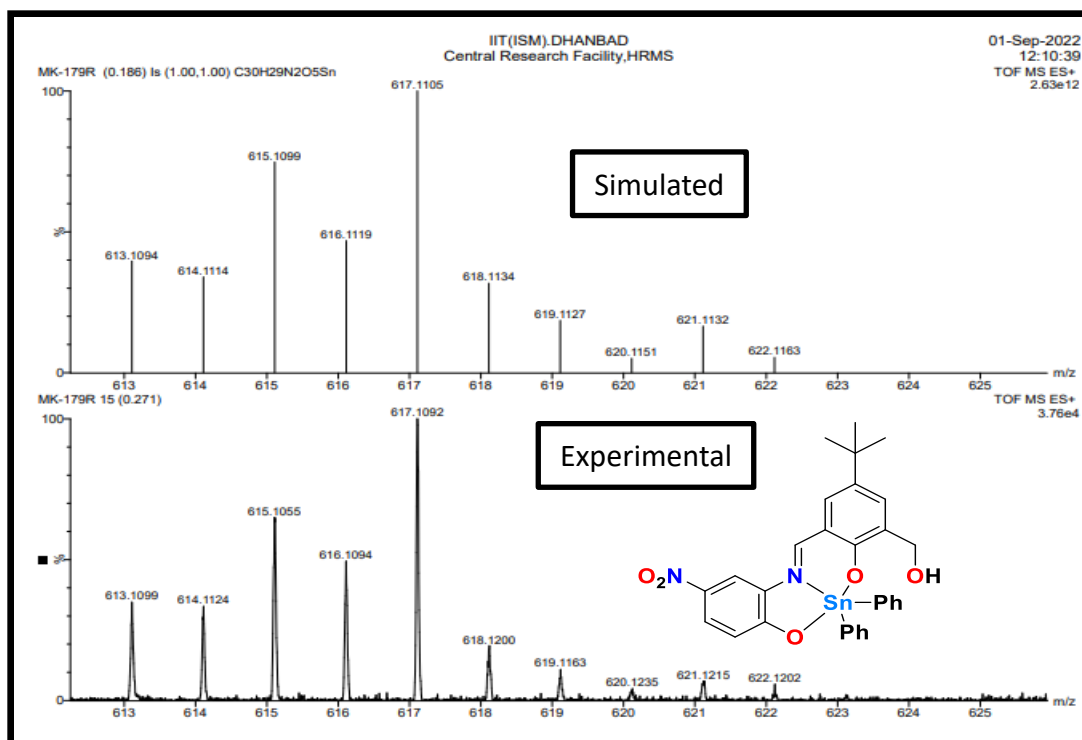

Figure S29: HRMS (ESI) spectrum of  $[M+H]^+$  ion of compound 1.

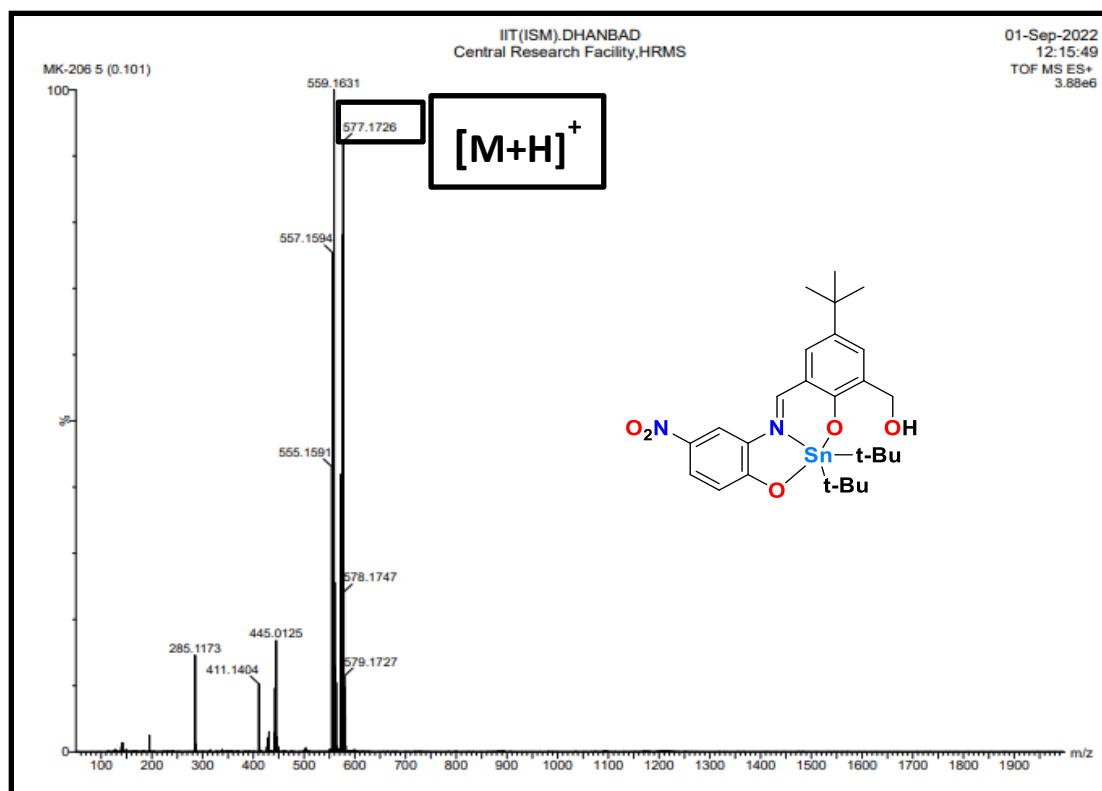

Figure S30: ESI-MS spectrum of compound 2.

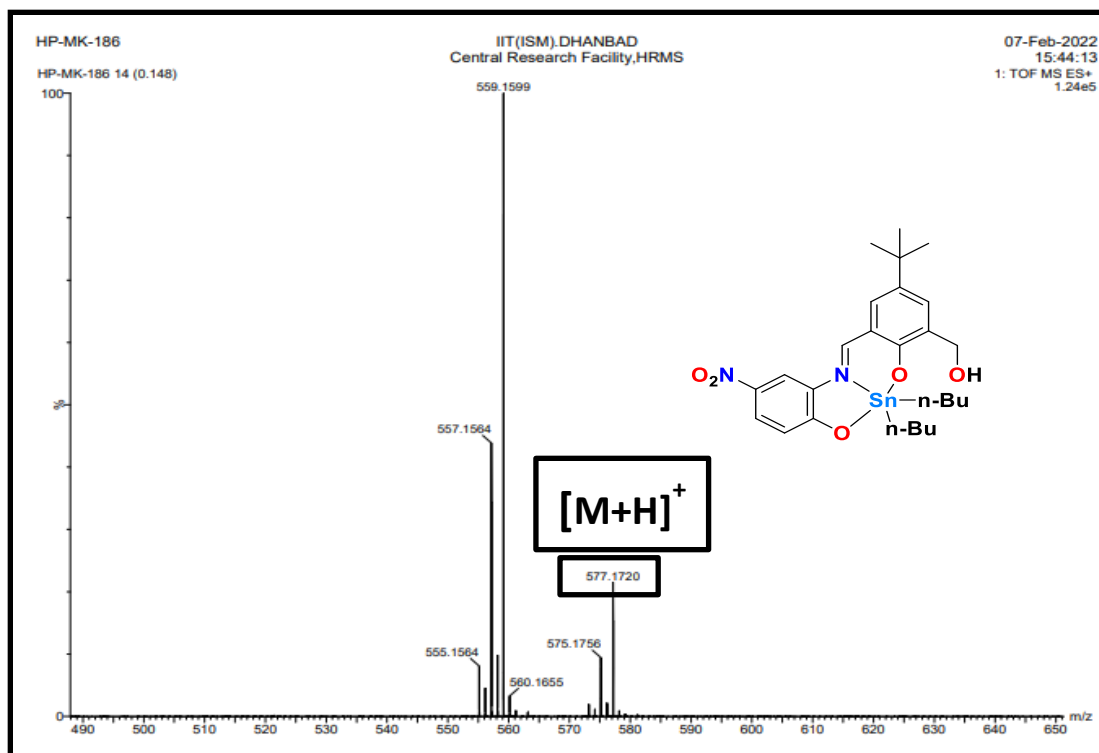

**Figure S31:** HRMS (ESI) spectrum of compound **3**.

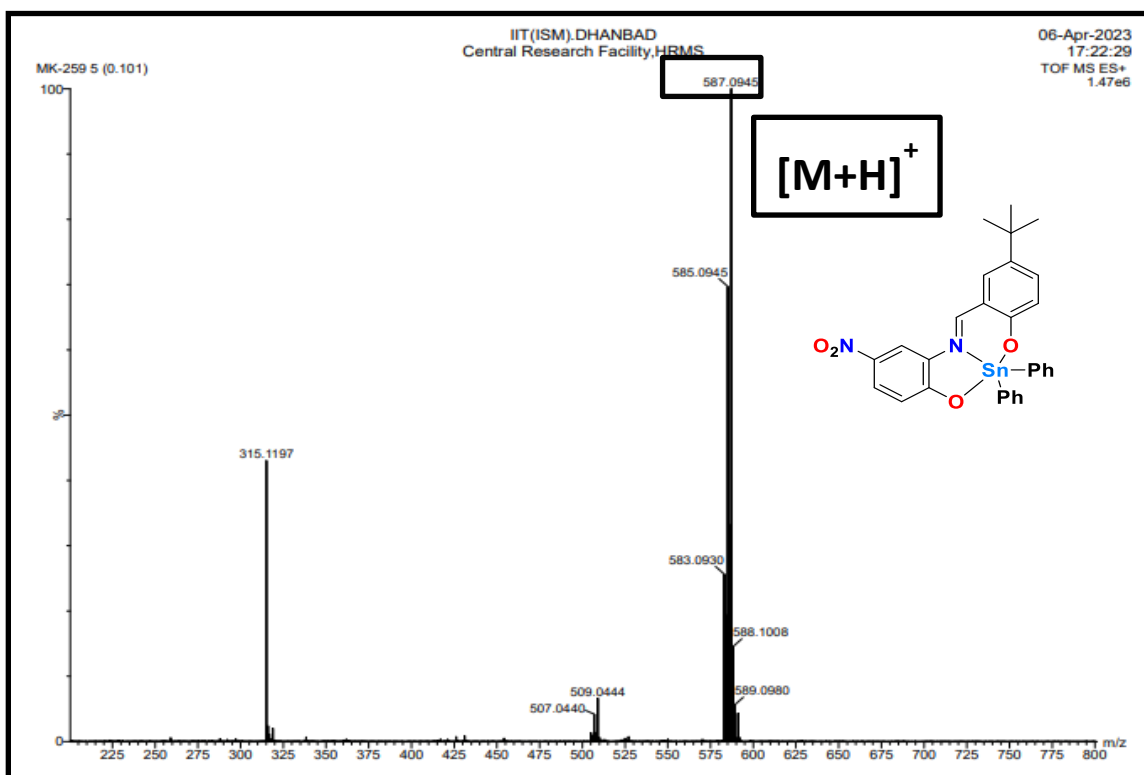

**Figure S32:** HRMS (ESI) spectrum of compound **4**.

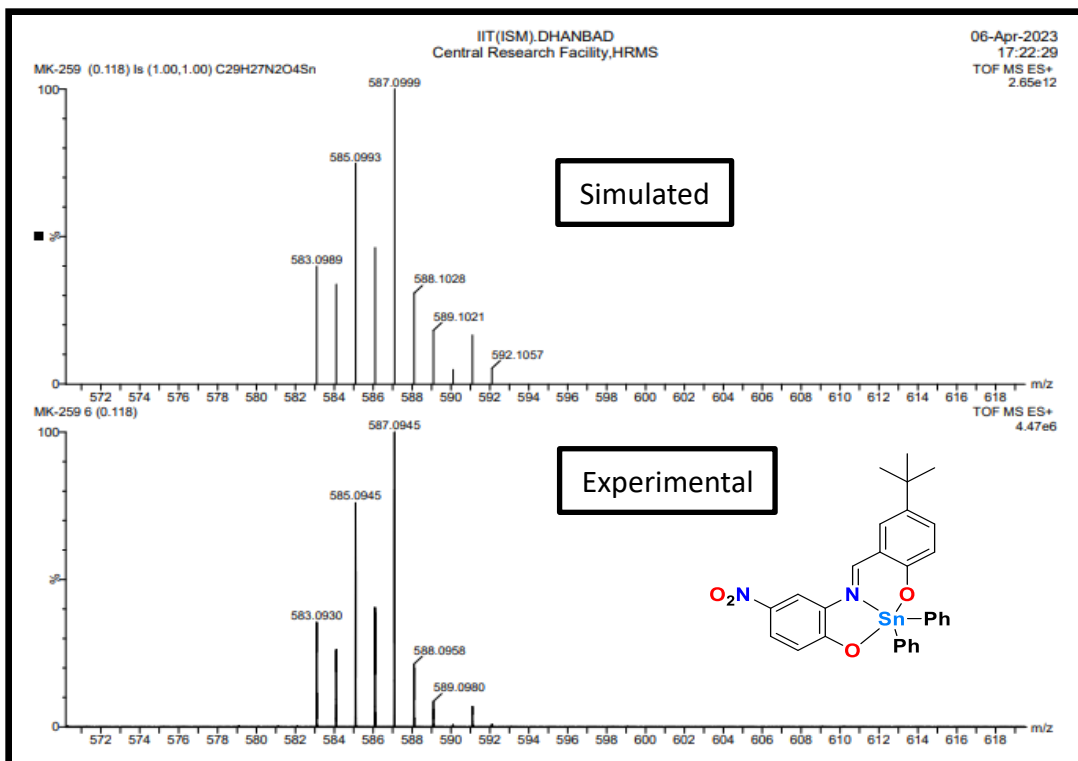

**Figure S33:** HRMS (ESI) spectrum of  $[M+H]^+$  ion of compound 4.

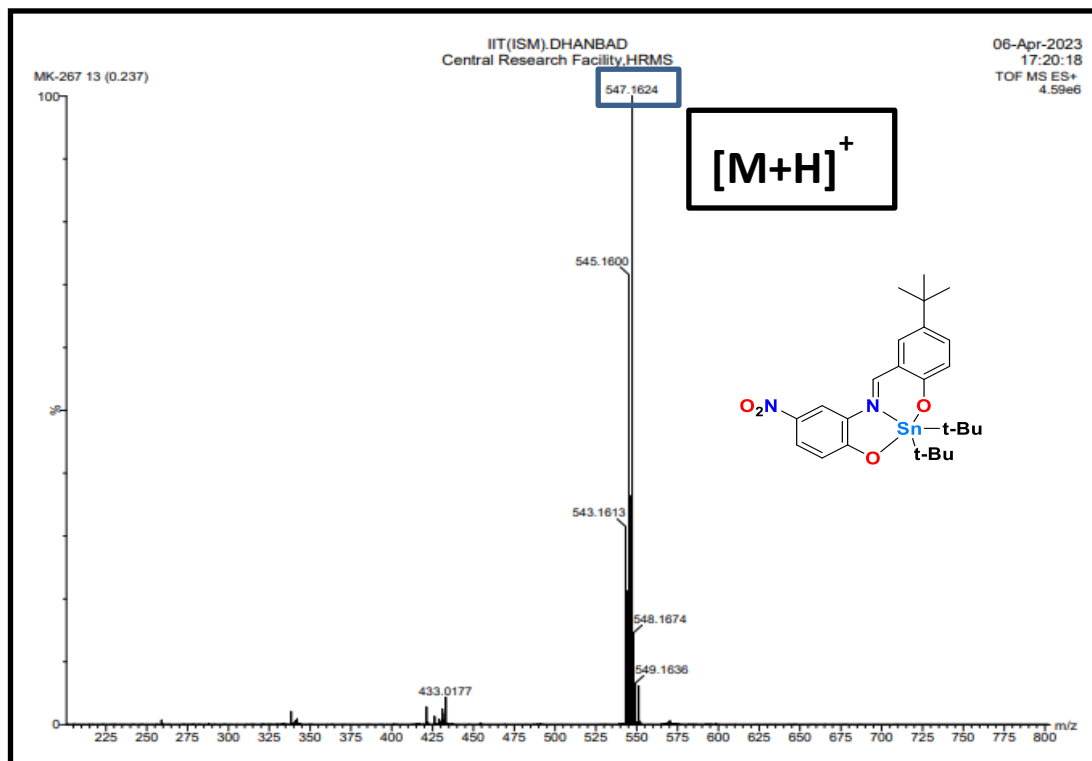

**Figure S34:** HRMS (ESI) spectrum of compound 5.

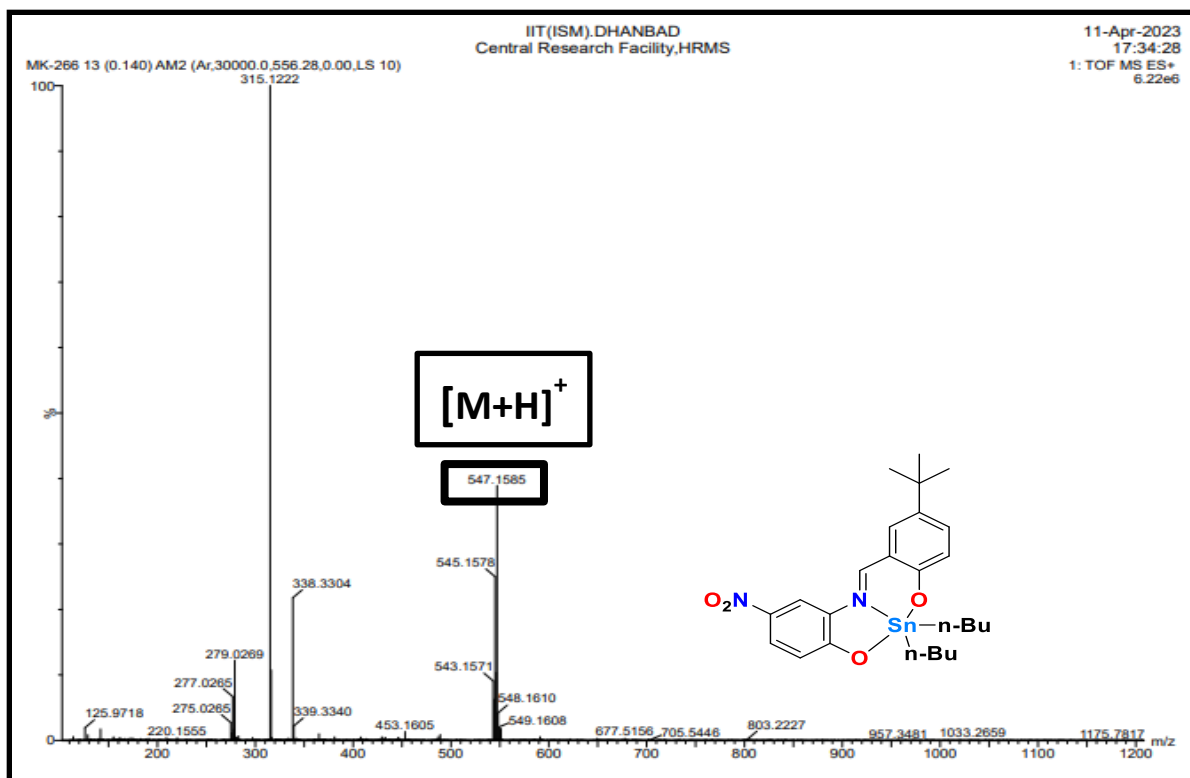

**Figure S35:** HRMS (ESI) spectrum of compound **6**.

### X-ray crystallography:

The crystallographic data of **1-6** were collected on a Rigaku SuperNova diffractometer equipped with an Eos S2 CCD detector, using Mo-K $\alpha$  radiation with graphite monochromator ( $\lambda = 0.71073 \text{ \AA}$ ) at  $T = 293(2) \text{ K}$ . The structure was solved with the ShelXT 2014/5 (Sheldrick, 2014) structure solution program and by using Olex2 as the graphical interface.<sup>1,2</sup> The model was refined with version 2018/3 of XL using Least Squares minimization.<sup>3</sup> Non-hydrogen atoms were anisotropically refined. H-atoms were included in the refinement of calculated positions riding on their carrier atoms. The function minimized was  $[\sum w(F_o^2 - F_c^2)^2]$  ( $w = 1 / [\sigma^2(F_o^2) + (aP)^2 + bP]$ ), where  $P = (\text{Max}(F_o^2, 0) + 2F_c^2) / 3$  with  $\sigma^2(F_o^2)$  from counting statistics. The function  $R1$  and  $wR2$  were  $(\sigma||F_o| - |F_c|) / \sigma|F_o|$  and  $[\sigma w(F_o^2 - F_c^2)^2 / \sigma(wF_o^4)]^{1/2}$ , respectively. Specific refinement details: Compound **2**: O3 atom is split over two positions O3A and O3B with 57% and 43% respectively. Regarding compound **3**, some highly disordered carbon atoms were refined isotropically. Compound **5**: three disordered carbon atoms (C19-C21) are split over two positions with 57% and 43% occupancy. Compound **6**: C22-C25 atoms are split over two positions with 59% and 41% occupancy respectively. C15-C17 are split over two position with 84% and 16% occupancy. CCDC 2270674-2270679 contain the supplementary crystallographic data for compounds **1-6**.

These data can be obtained free of charge from The Cambridge Crystallographic Data Centre via [www.ccdc.cam.ac.uk/data\\_request/cif](http://www.ccdc.cam.ac.uk/data_request/cif).

**Table S1** : Single crystal data collection and data refinement parameters for compounds **1-6**.

| Compound                                                                 | <b>1· MeOH</b>                                                      | <b>2</b>                                                            | <b>3</b>                                                                                      | <b>4</b>                                                            | <b>5</b>                                                            | <b>6</b>                                                            |
|--------------------------------------------------------------------------|---------------------------------------------------------------------|---------------------------------------------------------------------|-----------------------------------------------------------------------------------------------|---------------------------------------------------------------------|---------------------------------------------------------------------|---------------------------------------------------------------------|
| Formula                                                                  | C <sub>31</sub> H <sub>32</sub> N <sub>2</sub> O<br><sub>6</sub> Sn | C <sub>26</sub> H <sub>36</sub> N <sub>2</sub> O<br><sub>5</sub> Sn | C <sub>52</sub> H <sub>72</sub> N <sub>4</sub> O <sub>1</sub><br><sub>0</sub> Sn <sub>2</sub> | C <sub>29</sub> H <sub>26</sub> N <sub>2</sub> O <sub>4</sub><br>Sn | C <sub>25</sub> H <sub>34</sub> N <sub>2</sub> O <sub>4</sub><br>Sn | C <sub>25</sub> H <sub>34</sub> N <sub>2</sub> O <sub>4</sub><br>Sn |
| Formula mass                                                             | 647.320                                                             | 575.26                                                              | 1150.51                                                                                       | 585.21                                                              | 545.23                                                              | 545.270                                                             |
| <i>T</i> /K                                                              | 293(2)                                                              | 293(2)                                                              | 293(2)                                                                                        | 293(2)                                                              | 293(2)                                                              | 293(2)                                                              |
| $\lambda$ /Å                                                             | 0.71073                                                             | 0.71073                                                             | 0.71073                                                                                       | 0.71073                                                             | 0.71073                                                             | 0.71073                                                             |
| Crystal system                                                           | triclinic                                                           | triclinic                                                           | triclinic                                                                                     | triclinic                                                           | triclinic                                                           | triclinic                                                           |
| Space group                                                              | <i>P</i> -1                                                         | <i>P</i> -1                                                         | <i>P</i> -1                                                                                   | <i>P</i> -1                                                         | <i>P</i> -1                                                         | <i>P</i> -1                                                         |
| <i>a</i> /Å                                                              | 10.7364(3)                                                          | 11.8788(5)                                                          | 10.3278(6)                                                                                    | 10.4626(3)                                                          | 11.6108(4)                                                          | 10.3748(7)                                                          |
| <i>b</i> /Å                                                              | 12.0005(3)                                                          | 13.7443(3)                                                          | 15.8695(8)                                                                                    | 12.2766(4)                                                          | 13.7661(4)                                                          | 10.7560(6)                                                          |
| <i>c</i> /Å                                                              | 12.1066(3)                                                          | 18.5417(4)                                                          | 17.9400(12)                                                                                   | 12.4511(5)                                                          | 17.6211(5)                                                          | 13.2715(6)                                                          |
| $\alpha$ /°                                                              | 90.921(2)                                                           | 70.101(2)                                                           | 112.274(5)                                                                                    | 64.844(4)                                                           | 79.327(2)                                                           | 90.075(4)                                                           |
| $\beta$ /°                                                               | 97.576(2)                                                           | 81.539(2)                                                           | 93.904(5)                                                                                     | 65.315(3)                                                           | 81.161(3)                                                           | 110.462(5)                                                          |
| $\gamma$ /°                                                              | 112.023(2)                                                          | 76.408(3)                                                           | 96.094(4)                                                                                     | 66.761(3)                                                           | 77.032(3)                                                           | 111.715(6)                                                          |
| <i>V</i> /Å <sup>3</sup>                                                 | 1429.75(7)                                                          | 2759.29(2)                                                          | 2686.7(3)                                                                                     | 1268.69(9)                                                          | 2678.62(15)                                                         | 1274.47(1)                                                          |
| <i>Z</i>                                                                 | 2                                                                   | 4                                                                   | 2                                                                                             | 2                                                                   | 4                                                                   | 2                                                                   |
| <i>D<sub>c</sub></i> /g cm <sup>-3</sup>                                 | 1.504                                                               | 1.382                                                               | 1.422                                                                                         | 1.532                                                               | 1.352                                                               | 1.421                                                               |
| $\mu$ /mm <sup>-1</sup>                                                  | 0.940                                                               | 0.962                                                               | 0.988                                                                                         | 1.045                                                               | 0.984                                                               | 1.034                                                               |
| <i>F</i> (000)                                                           | 659                                                                 | 1184                                                                | 1184                                                                                          | 592                                                                 | 1120                                                                | 559                                                                 |
| 2 $\theta$ Range/°                                                       | 4.14 to<br>54.00                                                    | 4.096 to<br>54.00                                                   | 3.994-<br>54.00                                                                               | 3.8 to 54.00                                                        | 4.164 to<br>54.00                                                   | 4.12 to 50                                                          |
| Measured reflections                                                     | 23232                                                               | 44097                                                               | 25148                                                                                         | 19775                                                               | 23275                                                               | 11420                                                               |
| Independent reflections/ <i>R</i> <sub>int</sub>                         | 6211/ <i>R</i> <sub>int</sub> =<br>0.0620                           | 11981[ <i>R</i> <sub>int</sub><br>= 0.0608                          | 11557[ <i>R</i> <sub>int</sub><br>= 0.0424                                                    | 5491 [ <i>R</i> <sub>int</sub> =<br>0.0431,                         | 11494<br>[ <i>R</i> <sub>int</sub> =<br>0.0349                      | 4491 [ <i>R</i> <sub>int</sub> =<br>0.0559                          |
| Parameters                                                               | 367                                                                 | 642                                                                 | 573                                                                                           | 328                                                                 | 611                                                                 | 375                                                                 |
| <i>R</i> <sub>1</sub> ( <i>I</i> > 2 $\sigma$ ( <i>I</i> )) <sup>a</sup> | 0.0275                                                              | 0.0458                                                              | 0.0585                                                                                        | 0.0302                                                              | 0.0382                                                              | 0.0392                                                              |
| <i>wR</i> <sub>2</sub> (all data) <sup>b</sup>                           | 0.0667                                                              | 0.1158                                                              | 0.1733                                                                                        | 0.0749                                                              | 0.0779                                                              | 0.0727                                                              |
| Goodness-of-fit on <i>F</i> <sup>2</sup>                                 | 1.052                                                               | 1.056                                                               | 1.039                                                                                         | 1.047                                                               | 0.964                                                               | 0.887                                                               |
| $\Delta\rho$ <sub>max, min</sub> /e Å <sup>-3</sup>                      | 0.65/-0.54                                                          | 1.41/-0.62                                                          | 1.35/-1.10                                                                                    | 0.46/-0.53                                                          | 0.43/-0.55                                                          | 0.88/-0.76                                                          |

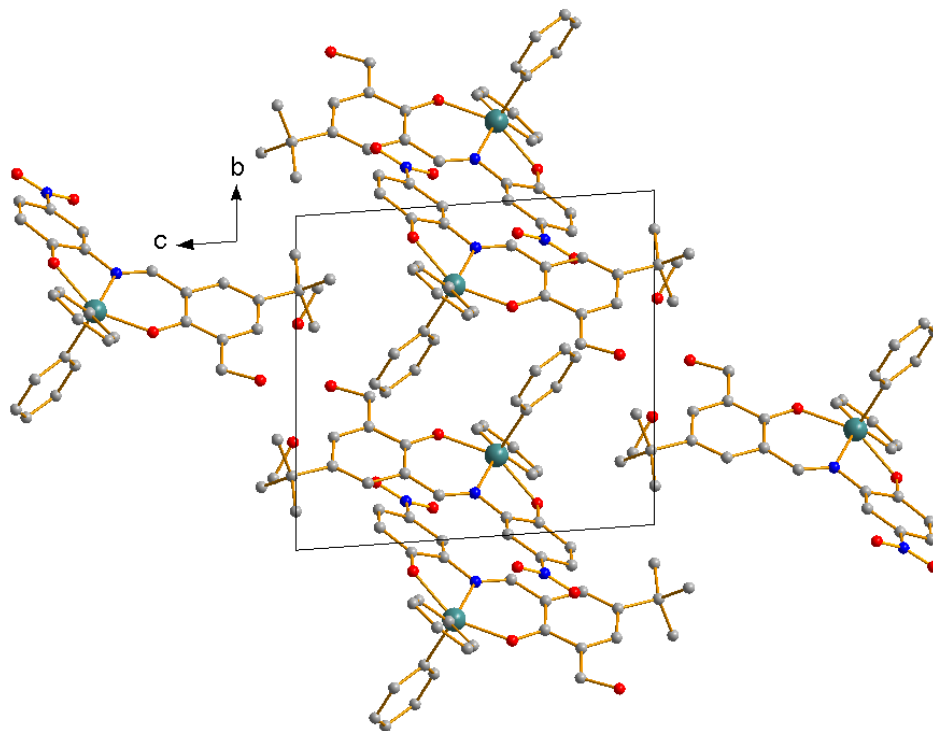

**Figure S36:** Packing of **1** within the unit cell viewed along crystallographic *a* axis.

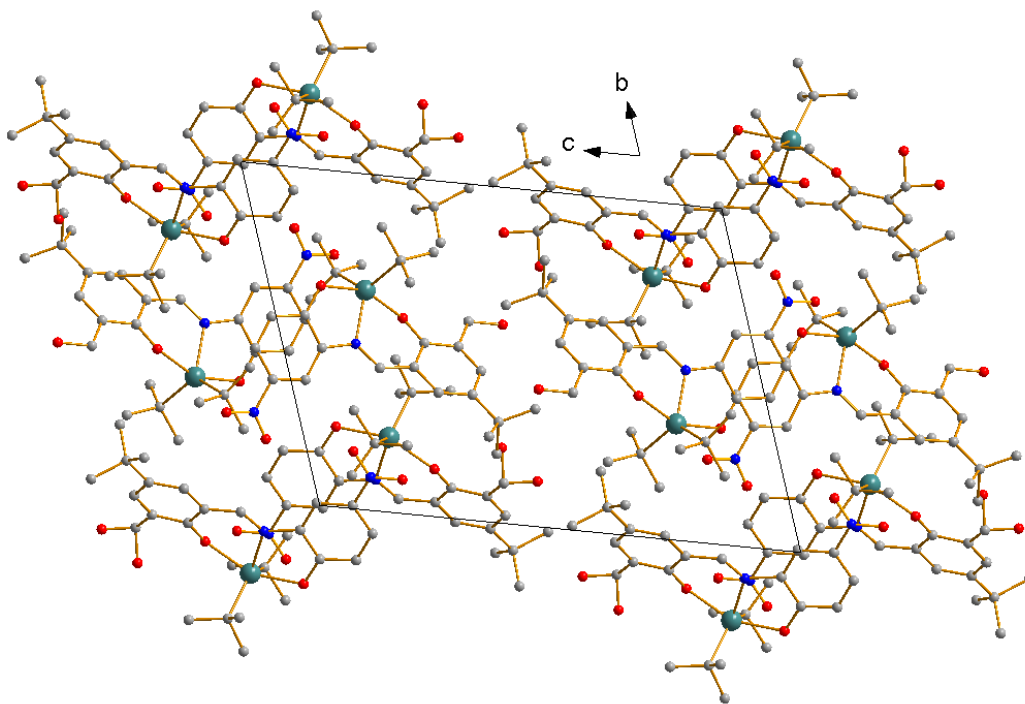

**Figure S37:** Packing of **2** within the unit cell viewed along crystallographic *a* axis.

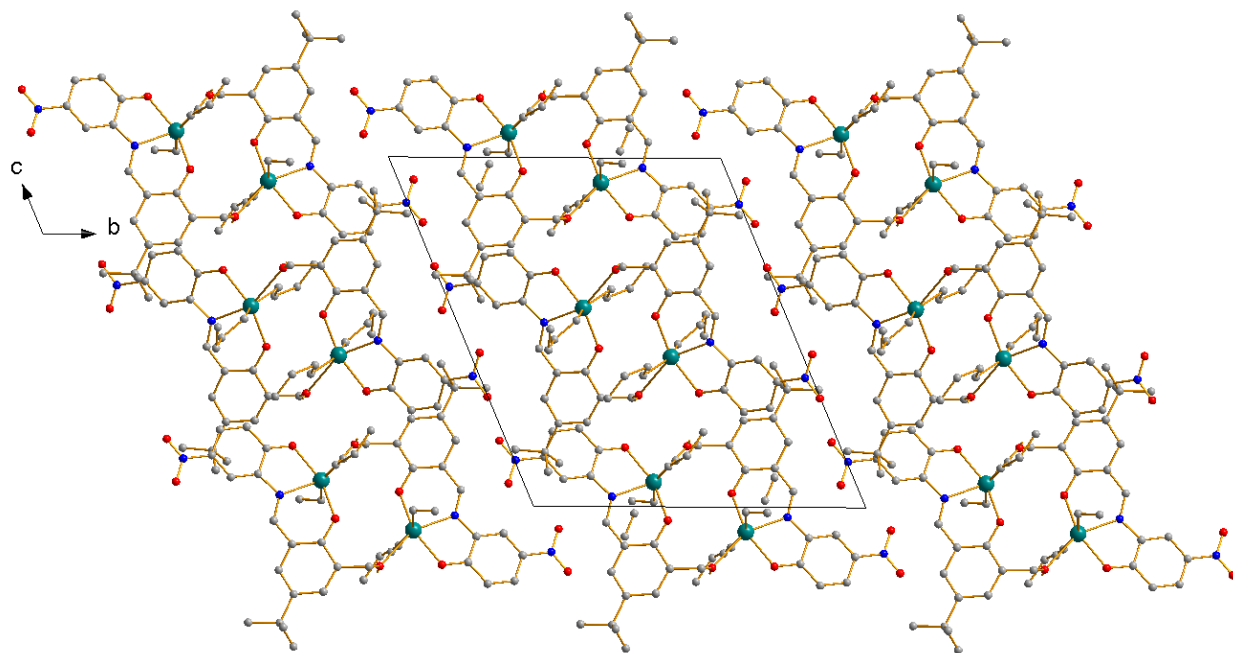

**Figure S38:** Packing of **3** within the unit cell viewed along crystallographic *a* axis.

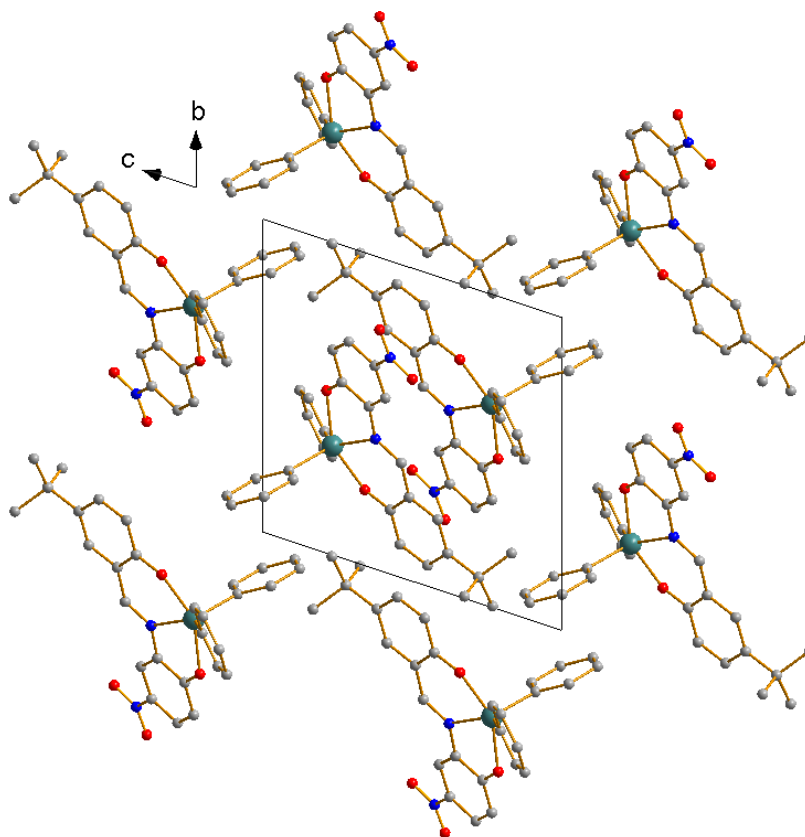

**Figure S39:** Packing of **4** within the unit cell viewed along crystallographic *a* axis.



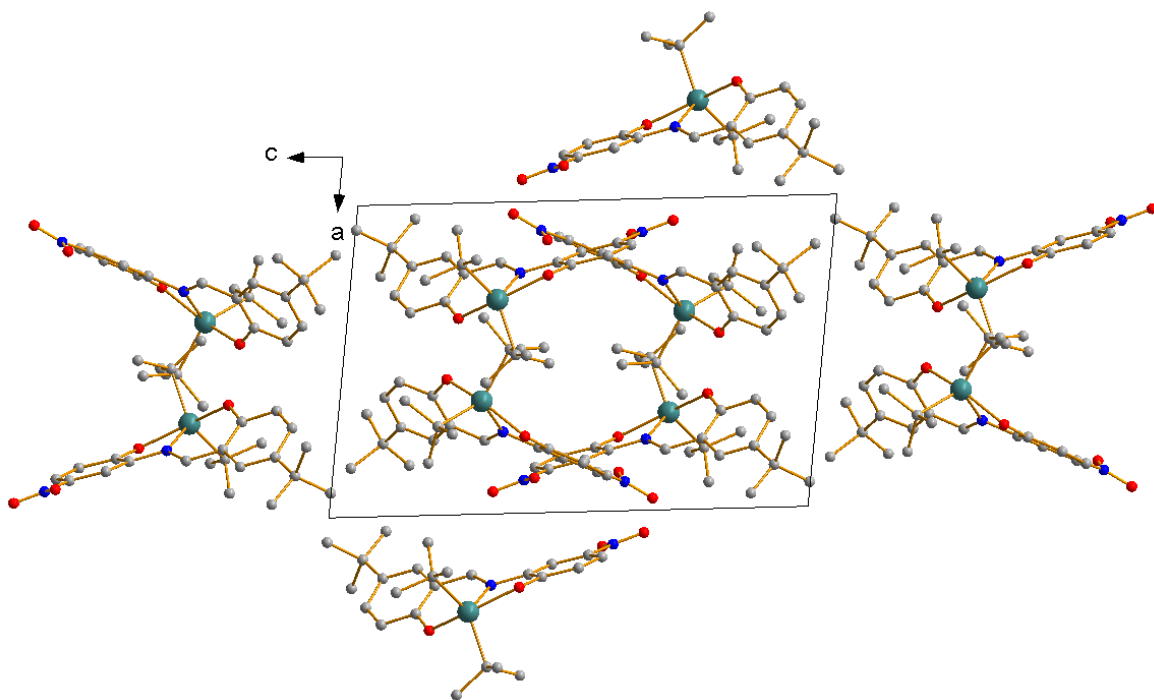

**Figure S40:** Packing of **5** within the unit cell viewed along crystallographic *b* axis.

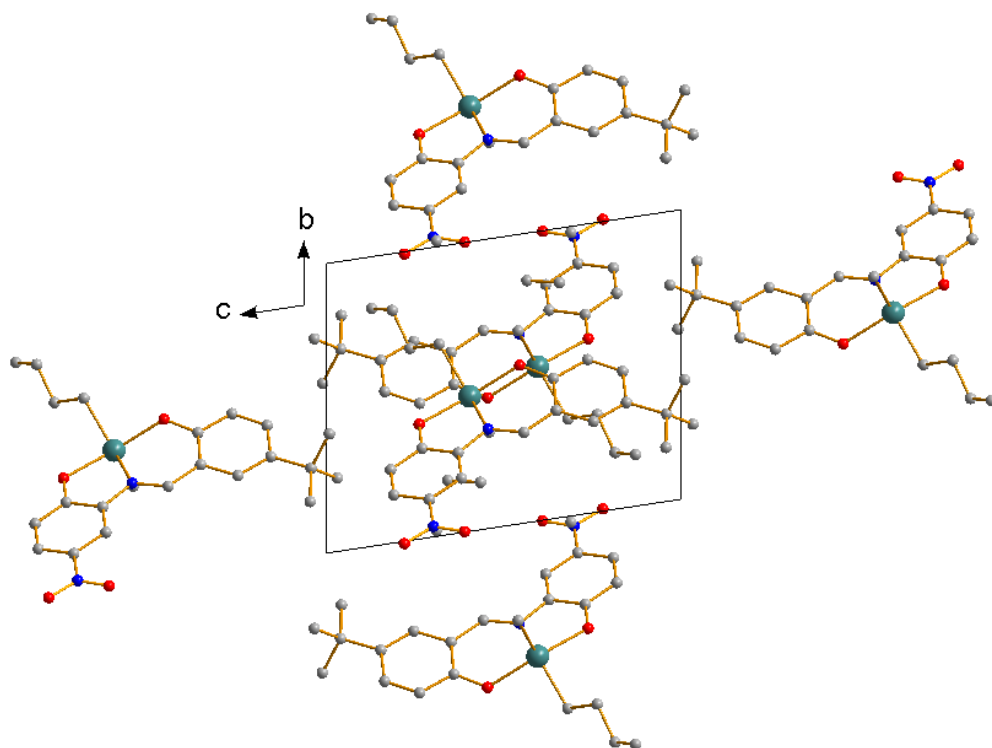

**Figure S41:** Packing of **6** within the unit cell viewed along crystallographic *a* axis.

**Table S2:** Isolated yield of 1,2- disubstituted benzimidazoles.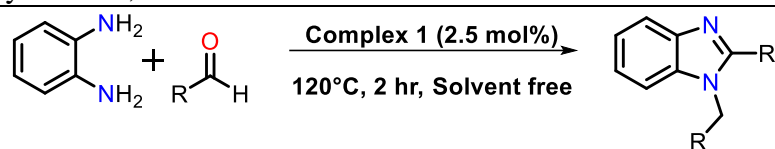

| Entry | R | Product | Code | Yield(%) | TON  | TOF (h <sup>-1</sup> ) |
|-------|---|---------|------|----------|------|------------------------|
| 1     |   |         | 2a   | 92       | 36.8 | 18.4                   |
| 2     |   |         | 2b   | 82       | 32.8 | 16.4                   |
| 3     |   |         | 2c   | 85       | 34   | 17                     |
| 4     |   |         | 2d   | 87       | 34.8 | 17.4                   |
| 5     |   |         | 2e   | 81       | 32.4 | 16.2                   |
| 6     |   |         | 2f   | 79       | 31.6 | 15.8                   |

|    |                                                                                     |                                                                                     |    |    |      |      |
|----|-------------------------------------------------------------------------------------|-------------------------------------------------------------------------------------|----|----|------|------|
| 7  | 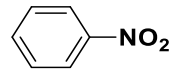   |    | 2g | 72 | 28.8 | 14.4 |
| 8  |    |    | 2h | 86 | 34.4 | 17.2 |
| 9  |    |    | 2i | 82 | 32.8 | 16.4 |
| 10 |  |   | 2j | 84 | 33.6 | 16.8 |
| 11 |  |  | 2k | 73 | 29.2 | 14.6 |
| 12 |  |  | 2l | 76 | 30.4 | 15.2 |

**Table S3: Characterization of isolated 1,2-disubstituted benzimidazoles:**

|                                                                                     |                                                                                                                                                                                                                                                                                                                                                                                                                                                                                                                                                                                                                                                                                                                         |
|-------------------------------------------------------------------------------------|-------------------------------------------------------------------------------------------------------------------------------------------------------------------------------------------------------------------------------------------------------------------------------------------------------------------------------------------------------------------------------------------------------------------------------------------------------------------------------------------------------------------------------------------------------------------------------------------------------------------------------------------------------------------------------------------------------------------------|
| 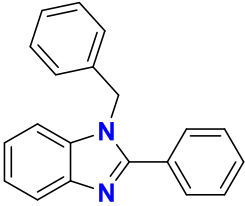   | <p><b>2a<sup>4</sup>:</b> Off white solid. <math>R_f = 0.24</math> (20% EtOAc/Petroleum ether). <math>^1\text{H NMR}</math> (400 MHz, <math>\text{CDCl}_3</math>): <math>\delta = 7.80</math> (d, <math>J = 8.0</math> Hz, 1H), 7.67–7.56 (m, 2H), 7.43 – 7.31 (m, 3H), 7.26-7.22 (m, 4H), 7.16-7.12 (m, 2H), 7.05–6.98 (m, 2H), 5.37 (s, 2H). <math>^{13}\text{C}\{^1\text{H}\}</math> NMR (100 MHz, <math>\text{CDCl}_3</math>): <math>\delta = 154.2</math>, 143.2, 136.4, 136.1, 130.1, 129.9, 129.3, 129.1, 128.8, 127.8, 126.0, 123.1, 122.7, 120.0, 110.5, 48.4.</p>                                                                                                                                             |
|    | <p><b>2b<sup>4</sup>:</b> Off white solid. <math>R_f = 0.2</math> (20% EtOAc/Petroleum ether). <math>^1\text{H NMR}</math> (400 MHz, <math>\text{CDCl}_3</math>): <math>\delta = 7.87</math> (d, <math>J = 8.0</math> Hz, 1H), 7.58 (d, <math>J = 8.1</math> Hz, 2H), 7.32-7.28 (m, 1H), 7.24 (d, <math>J = 6.6</math> Hz, 2H), 7.23–.19 (m, 2H), 7.14 (d, <math>J = 7.9</math> Hz, 2H), 7.00 (d, <math>J = 8.0</math> Hz, 2H), 5.41 (s, 2H), 2.39 (s, 3H), 2.34 (s, 3H). <math>^{13}\text{C}\{^1\text{H}\}</math> NMR (100 MHz, <math>\text{CDCl}_3</math>): <math>\delta = 154.4</math>, 142.9, 140.2, 137.5, 136.0, 133.4, 129.7, 129.5, 129.2, 126.8, 125.9, 123.0, 122.5, 119.7, 110.6, 48.2, 21.4, 21.1.</p>      |
|   | <p><b>2c<sup>5</sup>:</b> White solid. <math>R_f = 0.4</math> (20% EtOAc/Petroleum ether). <math>^1\text{H NMR}</math> (400 MHz, <math>\text{CDCl}_3</math>): <math>\delta = 7.87</math>-7.86 (d, <math>J = 8.0</math> Hz, 1H), 7.65 – 7.63 (m, 2H), 7.33-7.28 (m, 3H), 7.24 – 7.21 (m, 2H), 7.19-7.17 (d, <math>J = 8.1</math> Hz, 2H), 7.04 (d, <math>J = 8.2</math> Hz, 2H), 5.44 (s, 2H), 3.01-2.84 (m, 2H), 1.28-1.23 (m, 12H). <math>^{13}\text{C}\{^1\text{H}\}</math> NMR (100 MHz, <math>\text{CDCl}_3</math>): <math>\delta = 154.4</math>, 150.9, 148.4, 143.2, 136.1, 133.8, 129.3, 127.5, 127.1, 126.9, 126.0, 122.8, 122.5, 119.8, 110.6, 48.2, 34.1, 33.8, 23.9, 23.8.</p>                               |
|  | <p><b>2d<sup>6</sup>:</b> Pale brown solid. <math>R_f = 0.4</math> (20% EtOAc/Petroleum ether). <math>^1\text{H NMR}</math> (400 MHz, <math>\text{CDCl}_3</math>): <math>\delta = 7.88</math>-7.86 (d, <math>J = 8.0</math> Hz, 1H), 7.68-7.66 (d, <math>J = 8.3</math> Hz, 2H), 7.48 (d, <math>J = 8.3</math> Hz, 2H), 7.39-7.32 (m, 3H), 7.22 (d, <math>J = 3.0</math> Hz, 2H), 7.06 (d, <math>J = 8.1</math> Hz, 2H), 5.43 (s, 2H), 1.35 (s, 9H), 1.31 (s, 9H). <math>^{13}\text{C}\{^1\text{H}\}</math> NMR (100 MHz, <math>\text{CDCl}_3</math>): <math>\delta = 154.3</math>, 153.6, 150.7, 143.2, 136.1, 133.4, 129.0, 127.7, 126.0, 125.8, 125.7, 122.8, 122.5, 119.8, 110.6, 48.2, 34.9, 34.6, 31.3, 31.2.</p> |
|                                                                                     | <p><b>2e<sup>7</sup>:</b> Pale yellow solid. <math>R_f = 0.25</math> (20% EtOAc/Petroleum ether). <math>^1\text{H NMR}</math> (400 MHz, <math>\text{CDCl}_3</math>): <math>\delta = 7.86</math> (d, <math>J = 7.9</math> Hz, 1H), 7.59 (d, <math>J = 8.4</math> Hz, 2H), 7.51 (d, <math>J = 8.5</math> Hz, 2H), 7.46 (d, <math>J = 8.3</math> Hz, 2H), 7.35 – 7.25 (m, 2H), 7.19 (d, <math>J = 8.0</math></p>                                                                                                                                                                                                                                                                                                           |

|                                                                                     |                                                                                                                                                                                                                                                                                                                                                                                                                                                                                                                                                                                                                                                                                                                                                                                           |
|-------------------------------------------------------------------------------------|-------------------------------------------------------------------------------------------------------------------------------------------------------------------------------------------------------------------------------------------------------------------------------------------------------------------------------------------------------------------------------------------------------------------------------------------------------------------------------------------------------------------------------------------------------------------------------------------------------------------------------------------------------------------------------------------------------------------------------------------------------------------------------------------|
| 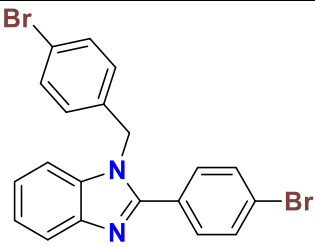   | <p>Hz, 1H), 6.95 (d, <math>J = 8.3</math> Hz, 2H), 5.37 (s, 2H). <math>^{13}\text{C}\{^1\text{H}\}</math> (100 MHz, <math>\text{CDCl}_3</math>) <math>\delta = 152.9, 143.1, 135.9, 135.2, 132.4, 132.1, 130.67, 128.8, 127.6, 124.7, 123.5, 123.1, 121.9, 120.2, 110.3, 47.9</math>.</p>                                                                                                                                                                                                                                                                                                                                                                                                                                                                                                 |
|    | <p><b>2f<sup>6</sup></b>: Pale yellow solid. <math>R_f = 0.3</math> (20% EtOAc/Petroleum ether). <math>^1\text{H}</math> NMR (400 MHz, <math>\text{CDCl}_3</math>): <math>\delta = 7.87</math> (d, <math>J = 8.0</math> Hz, 1H), 7.61-7.56 (m, 2H), 7.46-7.41 (m, 2H), 7.37-7.26 (m, 4H), 7.19 (d, <math>J = 7.9</math> Hz, 1H), 7.01 (d, <math>J = 8.4</math> Hz, 2H), 5.39 (s, 2H). <math>^{13}\text{C}\{^1\text{H}\}</math> NMR (100 MHz, <math>\text{CDCl}_3</math>): <math>\delta = 152.9, 143.1, 136.4, 135.9, 134.7, 133.9, 130.5, 129.4, 129.2, 128.4, 127.3, 123.51, 123.1, 120.2, 110.3, 47.8</math>.</p>                                                                                                                                                                       |
|   | <p><b>2g<sup>7</sup></b>: Yellow solid. <math>R_f = 0.2</math> (20% EtOAc/Petroleum ether). <math>^1\text{H}</math> NMR (400 MHz, <math>\text{CDCl}_3</math>): <math>\delta = 8.36</math>-8.29 (m, 2H), 8.26-8.20 (m, 2H), 7.93 (d, <math>J = 8.0</math> Hz, 1H), 7.87-7.81 (m, 2H), 7.44-7.31 (m, 2H), 7.27 (d, <math>J = 8.5</math> Hz, 2H), 7.21 (d, <math>J = 8.0</math> Hz, 1H), 5.58 (s, 2H). <math>^{13}\text{C}\{^1\text{H}\}</math> NMR (100 MHz, <math>\text{CDCl}_3</math>): <math>\delta = 151.4, 148.7, 147.9, 143.2, 142.8, 136.0, 135.8, 130.0, 126.7, 124.7, 124.6, 124.2, 123.8, 120.9, 110.2, 48.0</math>.</p>                                                                                                                                                          |
|  | <p><b>2h<sup>7</sup></b>: Off white solid. <math>R_f = 0.3</math> (20% EtOAc/Petroleum ether). <math>^1\text{H}</math> NMR (400 MHz, <math>\text{CDCl}_3</math>): <math>\delta = 7.84</math> (d, <math>J = 8.0</math> Hz, 1H), 7.63 (d, <math>J = 8.7</math> Hz, 2H), 7.30-7.28 (m, 1H), 7.21 (d, <math>J = 3.5</math> Hz, 2H), 7.03 (d, <math>J = 8.6</math> Hz, 2H), 6.96 (d, <math>J = 8.7</math> Hz, 2H), 6.85 (d, <math>J = 8.7</math> Hz, 2H), 5.38 (s, 2H), 3.84 (s, <math>J = 8.1</math> Hz, 3H), 3.78 (s, <math>J = 7.0</math> Hz, 3H). <math>^{13}\text{C}\{^1\text{H}\}</math> NMR (100 MHz, <math>\text{CDCl}_3</math>): <math>\delta = 160.9, 159.1, 154.1, 143.1, 136.1, 130.7, 128.5, 127.2, 122.8, 122.6, 122.4, 119.7, 114.4, 114.2, 110.5, 55.4, 55.3, 47.0</math>.</p> |
|  | <p><b>2i<sup>5</sup></b>: White solid. <math>R_f = 0.3</math> (20% EtOAc/Petroleum ether). <math>^1\text{H}</math> NMR (400 MHz, <math>\text{DMSO-}d_6</math>): <math>\delta = 9.96</math> (s, 1H), 9.44 (s, 1H), 7.63 (dd, <math>J = 7.3, 1.5</math> Hz, 1H), 7.55-7.47 (m, 2H), 7.42-7.37 (m, 1H), 7.21-7.14 (m, 2H), 6.89-6.85 (m, 2H), 6.81 (d, <math>J = 8.6</math> Hz, 2H), 6.66-6.60 (m, 2H), 5.39 (s, 2H). <math>^{13}\text{C}\{^1\text{H}\}</math> NMR (100 MHz, <math>\text{DMSO-}d_6</math>): <math>\delta = 159.4, 157.2, 154.1, 143.2, 136.3, 131.1, 128.6, 128.0, 127.6, 122.6, 122.3, 121.2, 119.3, 116.0, 116., 111.4, 47.5</math>.</p>                                                                                                                                   |

|                                                                                    |                                                                                                                                                                                                                                                                                                                                                                                                                                                                                                                                                                                                                                                                                                                                             |
|------------------------------------------------------------------------------------|---------------------------------------------------------------------------------------------------------------------------------------------------------------------------------------------------------------------------------------------------------------------------------------------------------------------------------------------------------------------------------------------------------------------------------------------------------------------------------------------------------------------------------------------------------------------------------------------------------------------------------------------------------------------------------------------------------------------------------------------|
| 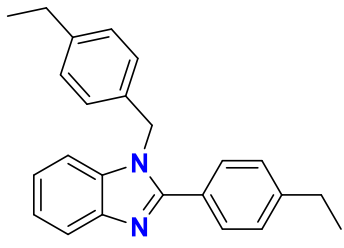  | <p><b>2j<sup>6</sup></b>: Brown solid. <math>R_f = 0.2</math> (30% EtOAc/Petroleum ether). <math>^1\text{H}</math> NMR (400 MHz, <math>\text{CDCl}_3</math>): <math>\delta = 7.91</math> (d, <math>J = 8.0</math> Hz, 1H), 7.66-7.64 (m, 2H), 7.32-7.28 (m, 3H), 7.24-7.20 (m, 2H), 7.18-7.16 (m, 2H), 7.05-7.03 (m, 2H), 5.43 (s, 2H), 2.73-2.63 (m, 4H), 1.29-1.22 (m, 6H). <math>^{13}\text{C}\{^1\text{H}\}</math> NMR (100 MHz, <math>\text{CDCl}_3</math>): <math>\delta = 154.3, 146.4, 143.8, 143.0, 136.1, 133.7, 129.3, 128.5, 128.3, 127.2, 126.0, 122.9, 122.7, 119.8, 110.6, 48.3, 28.8, 28.5, 15.5, 15.4</math>.</p>                                                                                                          |
|   | <p><b>2k<sup>7</sup></b>: White solid. <math>R_f = 0.2</math> (30% EtOAc/Petroleum ether). <math>^1\text{H}</math> NMR (400 MHz, <math>\text{CDCl}_3</math>): <math>\delta = 7.85</math>-7.72 (m, 1H), 7.63 (d, <math>J = 1.1</math> Hz, 1H), 7.54-7.43 (m, 1H), 7.34-7.23 (m, 3H), 7.24-7.15 (m, 1H), 6.59 (m, 1H), 6.30-6.17 (m, 2H), 5.61 (s, 2H). <math>^{13}\text{C}\{^1\text{H}\}</math> NMR (100 MHz, <math>\text{CDCl}_3</math>): <math>\delta = 149.6, 145.4, 144.0, 143.9, 143.0, 142.7, 135.5, 123.3, 122.9, 119.8, 113.0, 112.1, 110.5, 110.0, 108.4, 41.7</math>.</p>                                                                                                                                                          |
|  | <p><b>2l<sup>7</sup></b>: Brown solid. <math>R_f = 0.2</math> (30% EtOAc/Petroleum ether). <math>^1\text{H}</math> NMR (400 MHz, <math>\text{CDCl}_3</math>): <math>\delta = 7.85</math>-7.82 (m, 1H), 7.52 (dd, <math>J = 5.1, 1.0</math> Hz, 1H), 7.47 (dd, <math>J = 3.7, 1.0</math> Hz, 1H), 7.39-7.36 (m, 1H), 7.34-7.28 (m, 2H), 7.25 (dt, <math>J = 5.1, 1.9</math> Hz, 1H), 7.14 (dd, <math>J = 5.1, 3.7</math> Hz, 1H), 6.95 (dd, <math>J = 5.1, 3.5</math> Hz, 1H), 6.89-6.84 (m, 1H), 5.71 (s, 2H). <math>^{13}\text{C}\{^1\text{H}\}</math> NMR (100 MHz, <math>\text{CDCl}_3</math>): <math>\delta = 147.6, 143.0, 138.9, 135.9, 131.9, 129.0, 128.0, 128.0, 127.3, 125.5, 125.5, 123.4, 123.0, 120.0, 110.0, 44.1</math>.</p> |

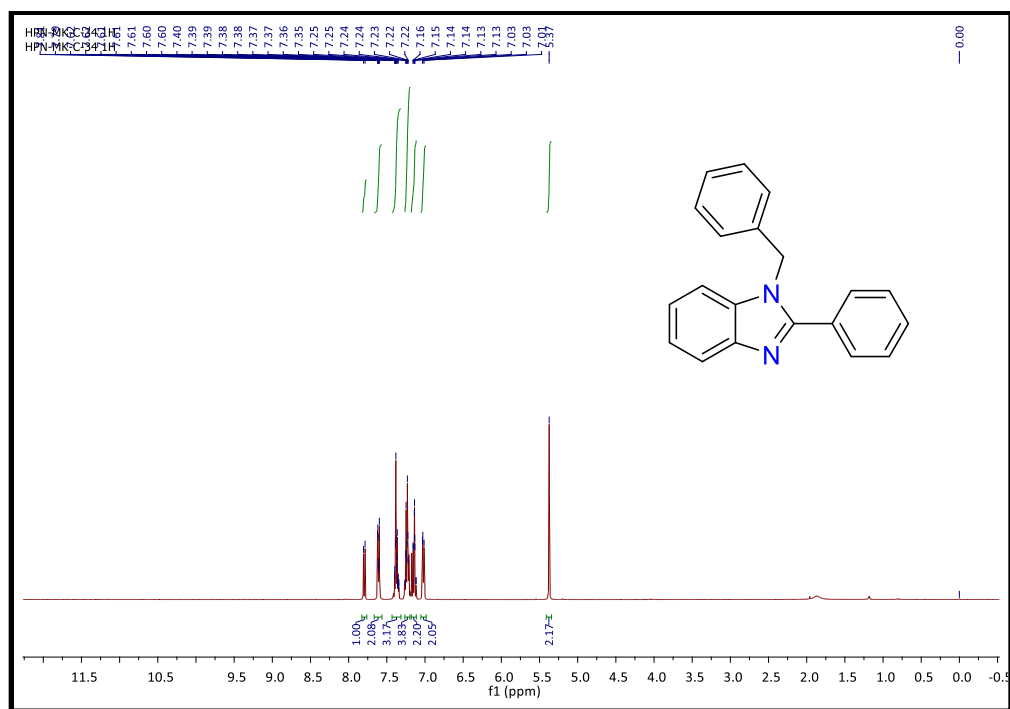

Figure S42:  $^1\text{H}$  NMR (400 MHz,  $\text{CDCl}_3$ ) spectrum of 2a.

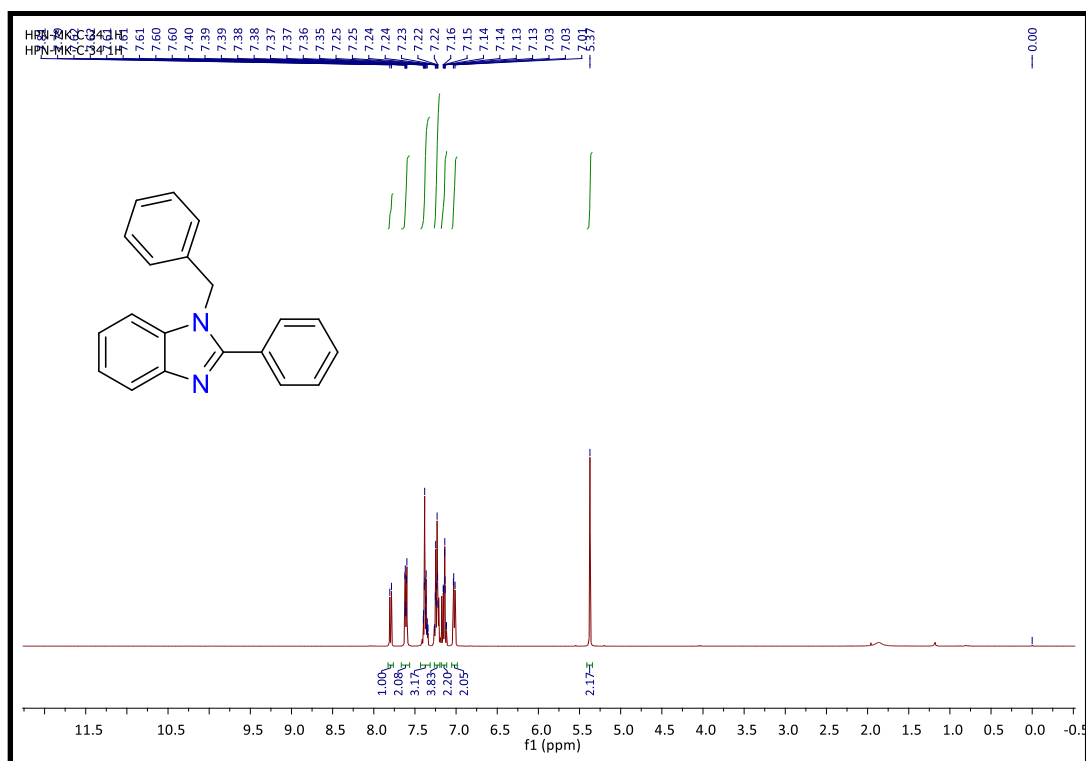

Figure S43:  $^{13}\text{C}\{^1\text{H}\}$  NMR (100 MHz,  $\text{CDCl}_3$ ) spectrum of 2a.

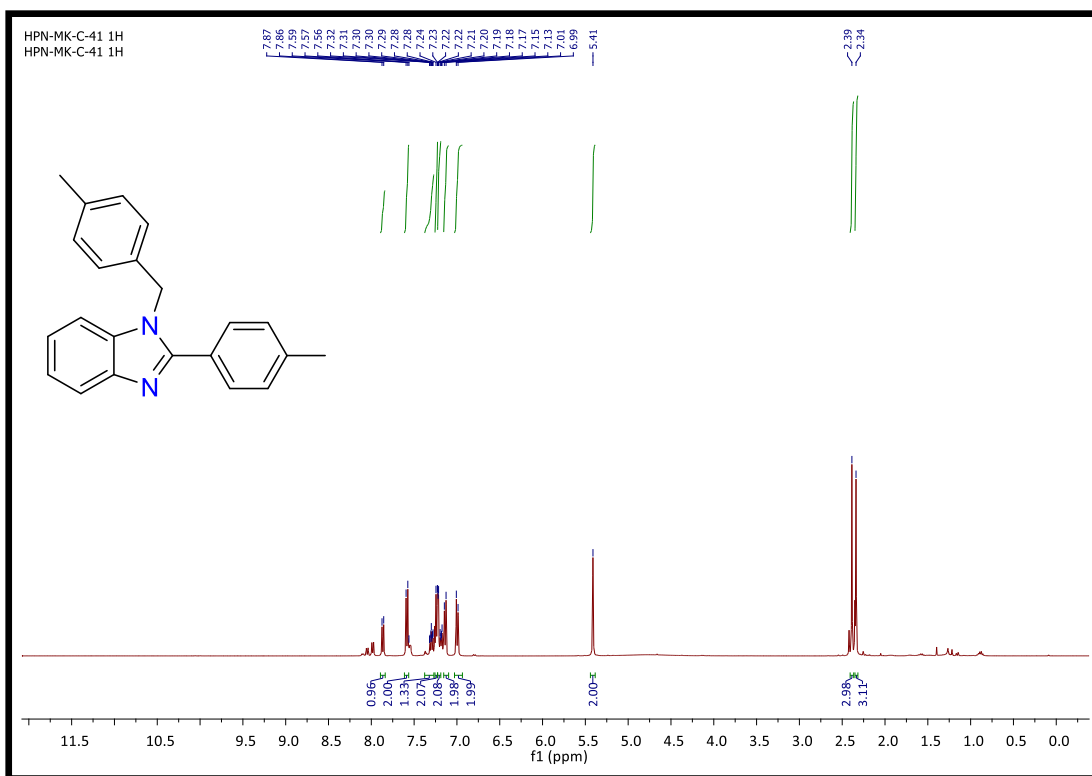

**Figure 44:**  $^1\text{H}$  NMR (400 MHz,  $\text{CDCl}_3$ ) spectrum of **2b**.

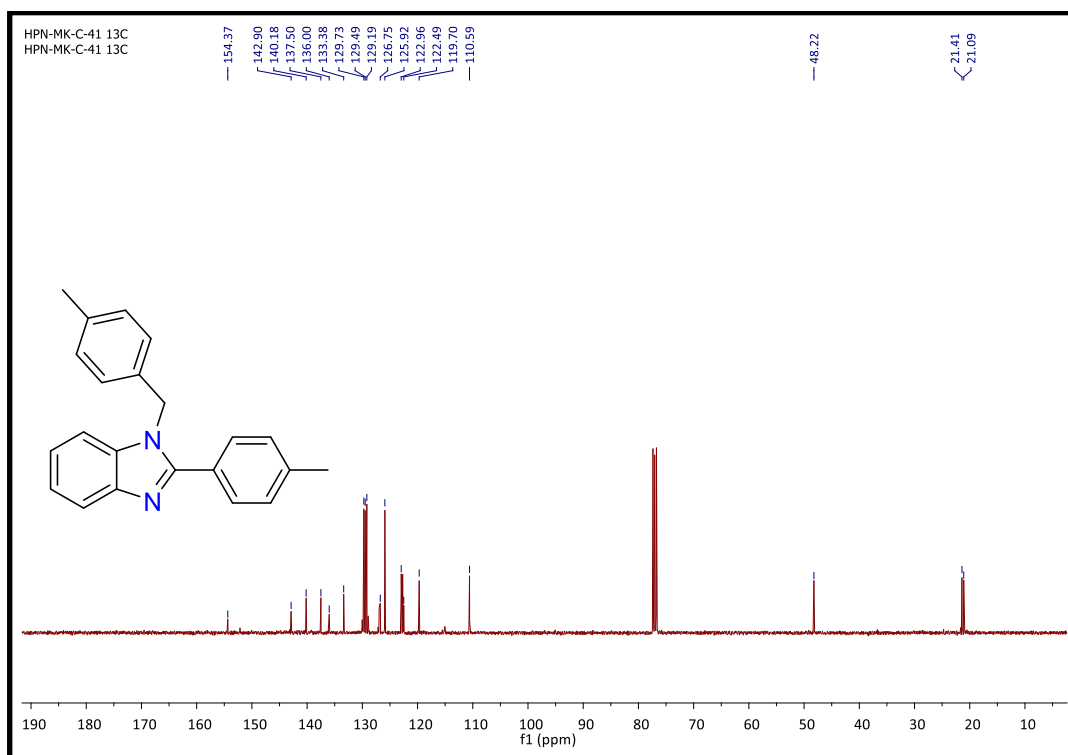

**Figure 45:**  $^{13}\text{C}$  NMR (100 MHz,  $\text{CDCl}_3$ ) spectrum of **2b**.



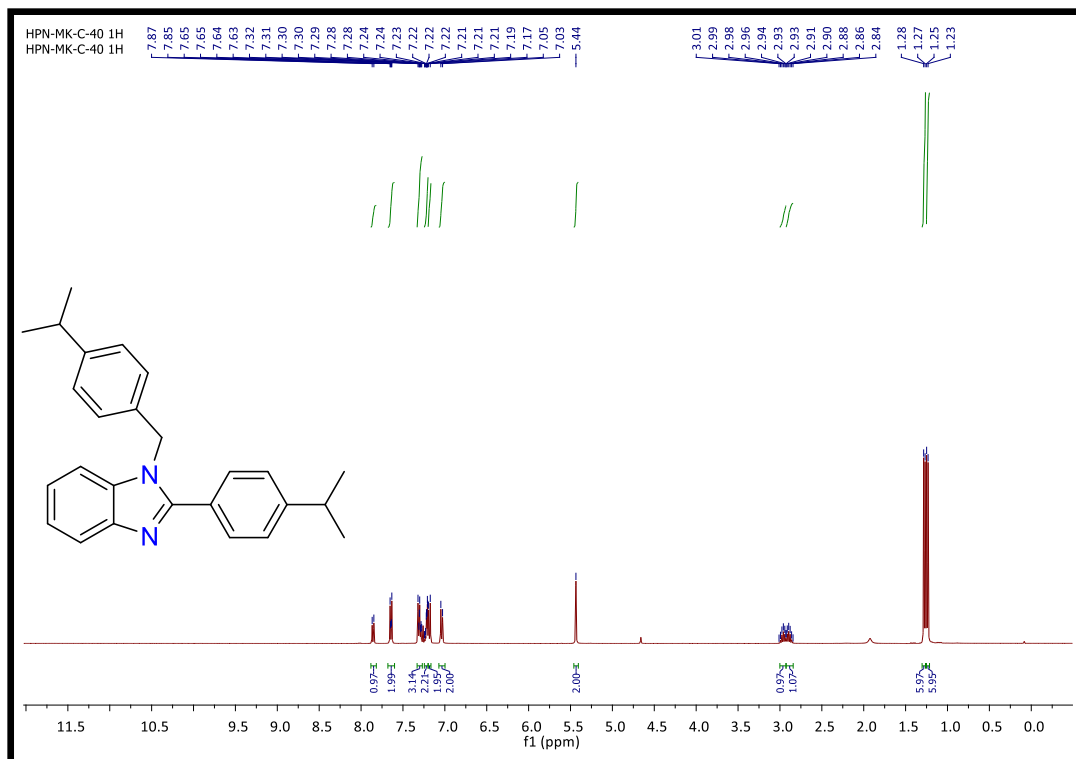

**Figure S46:**  $^1\text{H}$  NMR (400 MHz,  $\text{CDCl}_3$ ) spectrum of **2c**.

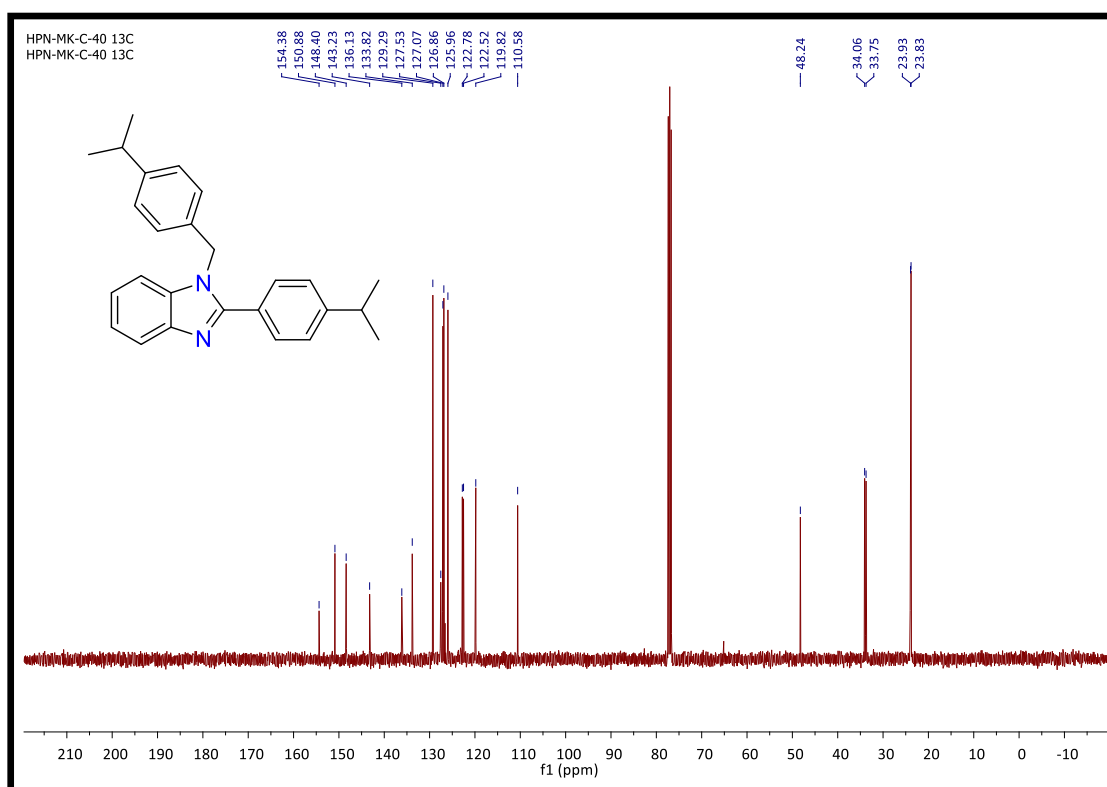

**Figure S47:**  $^{13}\text{C}\{^1\text{H}\}$  NMR (100 MHz,  $\text{CDCl}_3$ ) spectrum of **2c**.

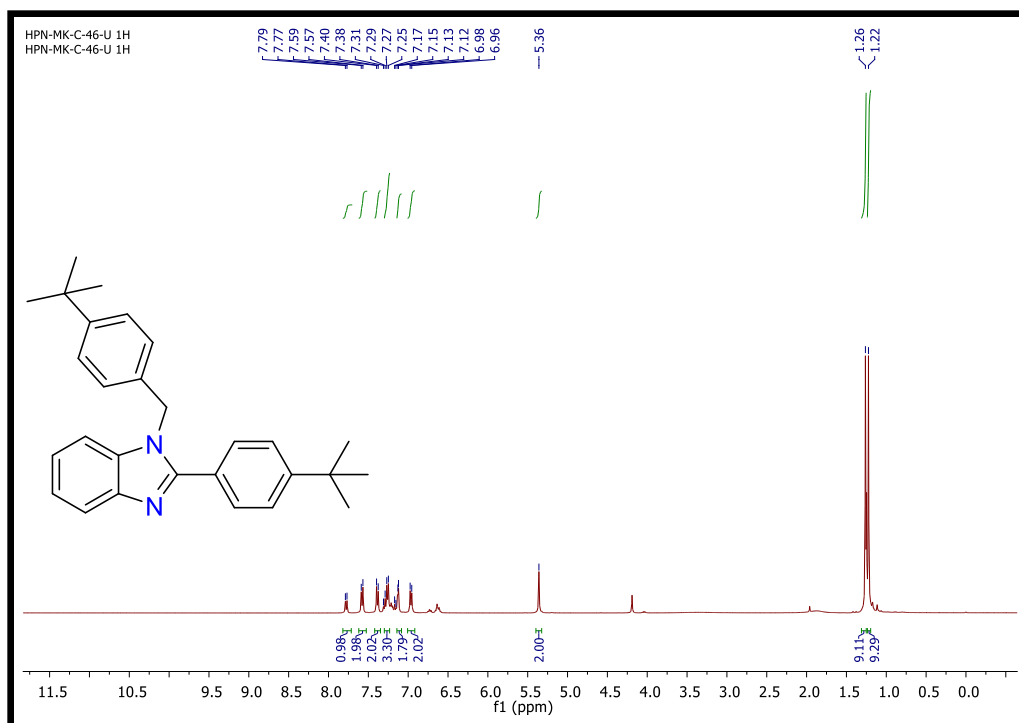

**Figure S48:**  $^1\text{H}$  NMR (400 MHz,  $\text{CDCl}_3$ ) spectrum of **2d**.

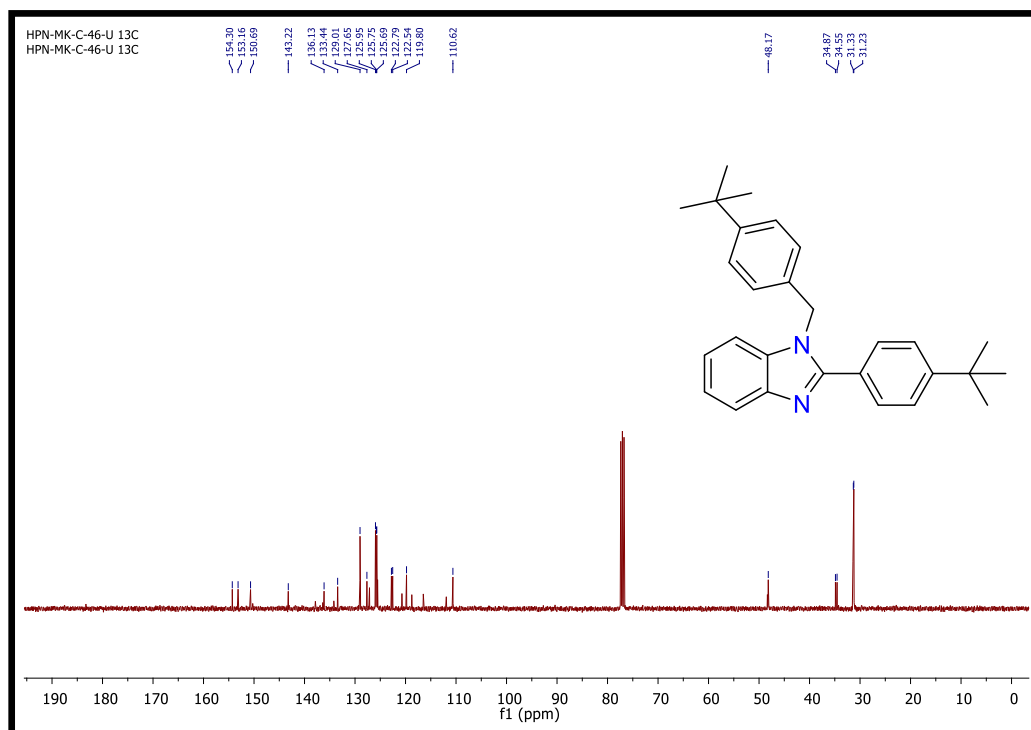

**Figure S49:**  $^{13}\text{C}$   $\{^1\text{H}\}$  NMR (100 MHz,  $\text{CDCl}_3$ ) spectrum of **2d**.

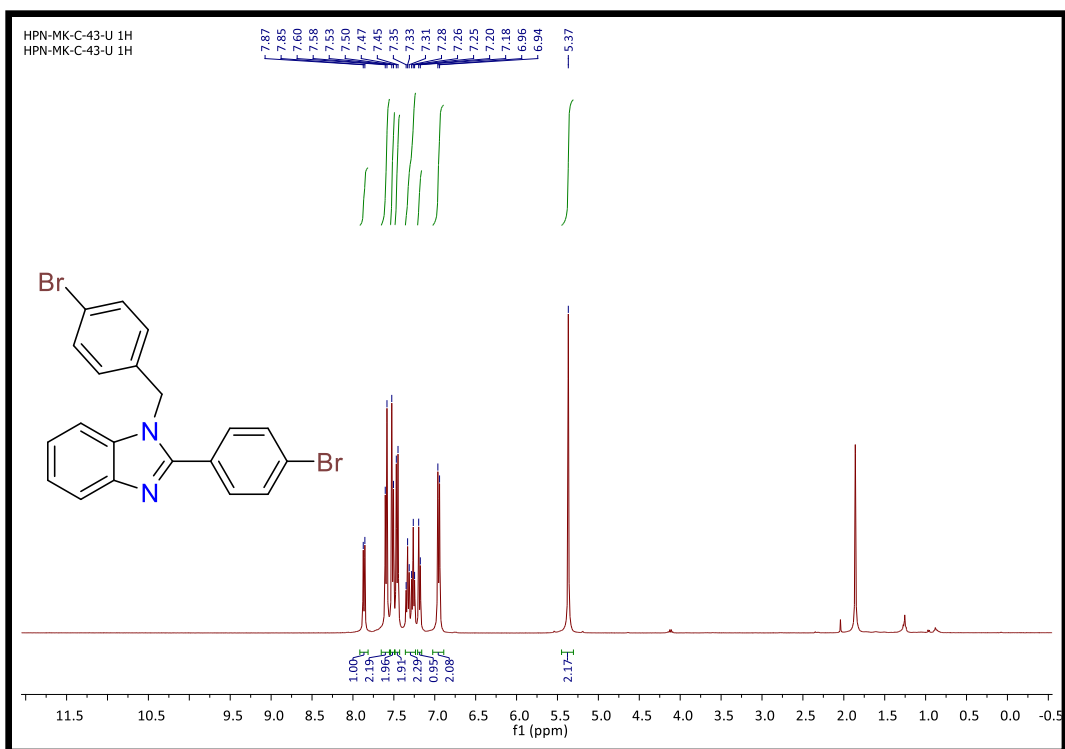

Figure S50:  $^1\text{H}$  NMR (400 MHz,  $\text{CDCl}_3$ ) spectrum of **2e**.

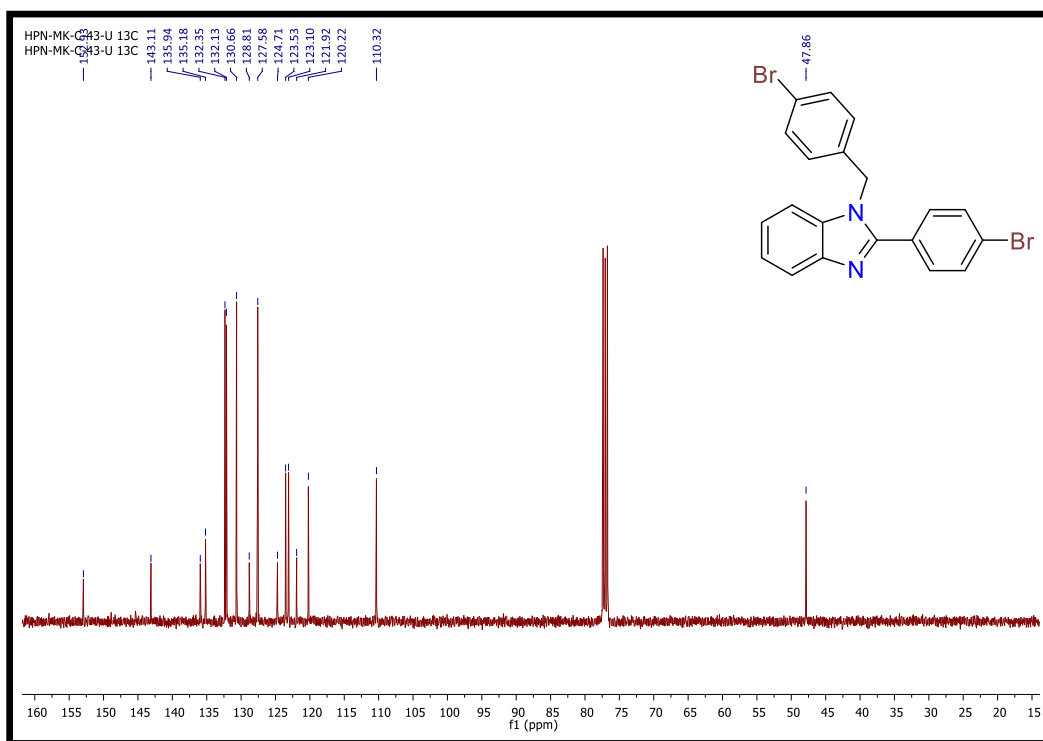

Figure S51:  $^{13}\text{C}\{^1\text{H}\}$  NMR (100 MHz,  $\text{CDCl}_3$ ) spectrum of **2e**.

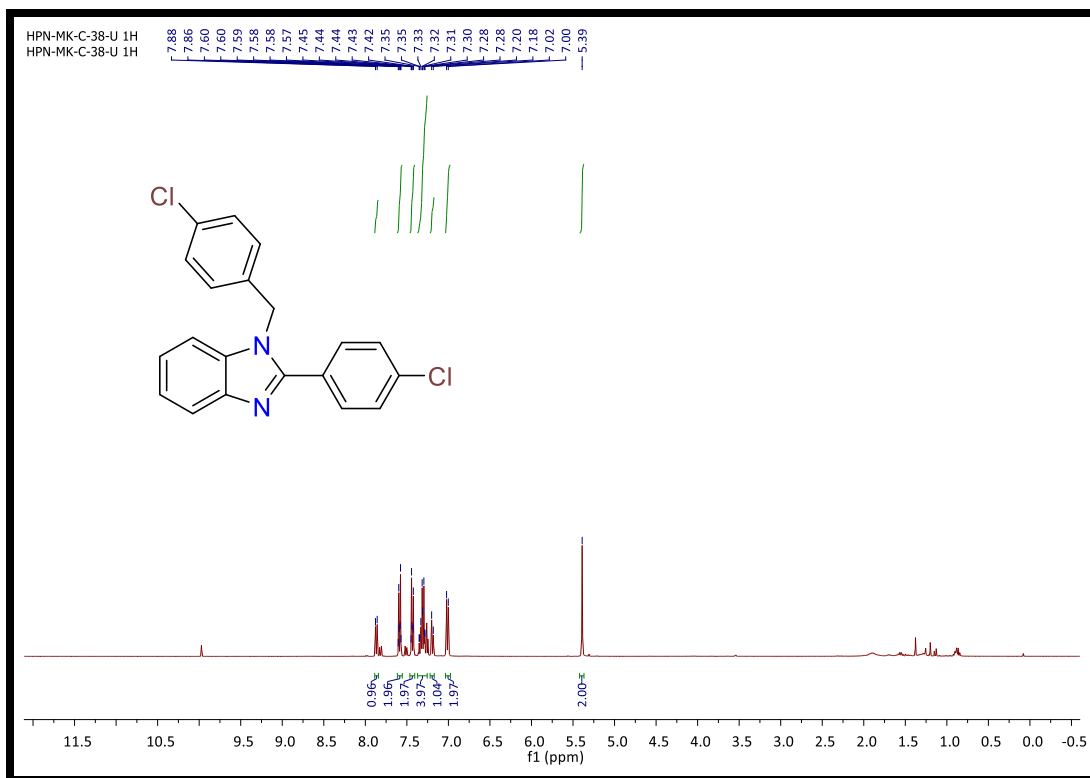

Figure S52:  $^1\text{H}$  NMR (400 MHz,  $\text{CDCl}_3$ ) spectrum of **2f**.

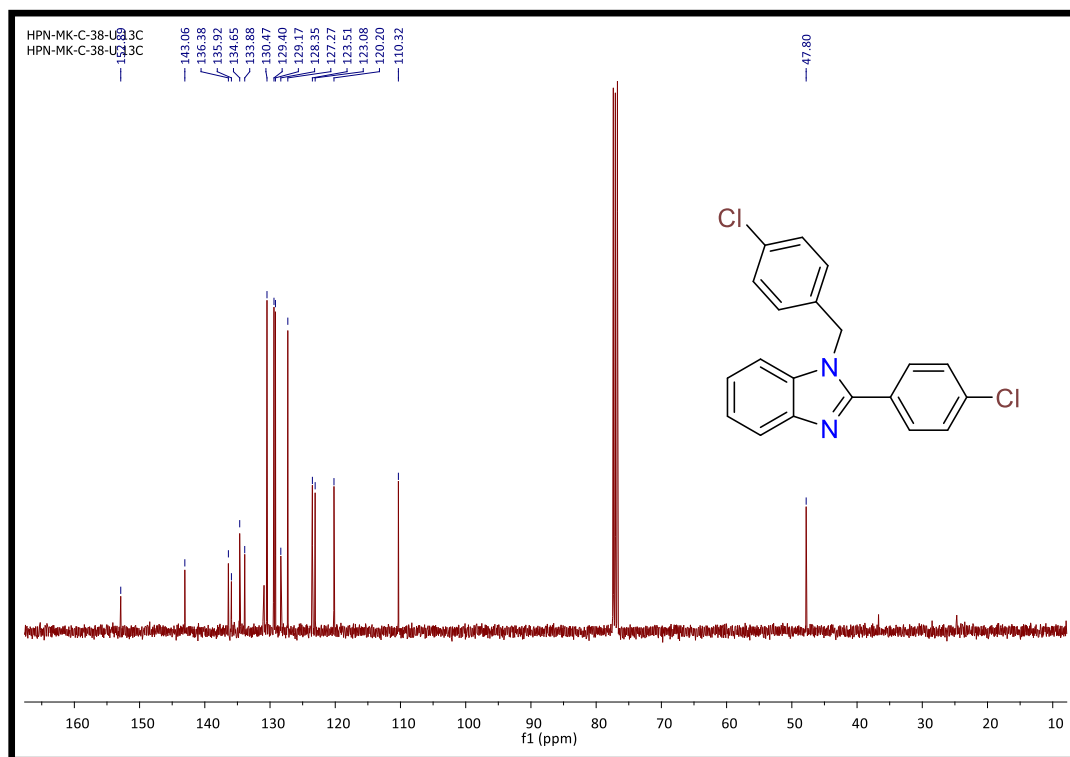

Figure S53:  $^{13}\text{C}\{^1\text{H}\}$  NMR (100 MHz,  $\text{CDCl}_3$ ) spectrum of **2f**.

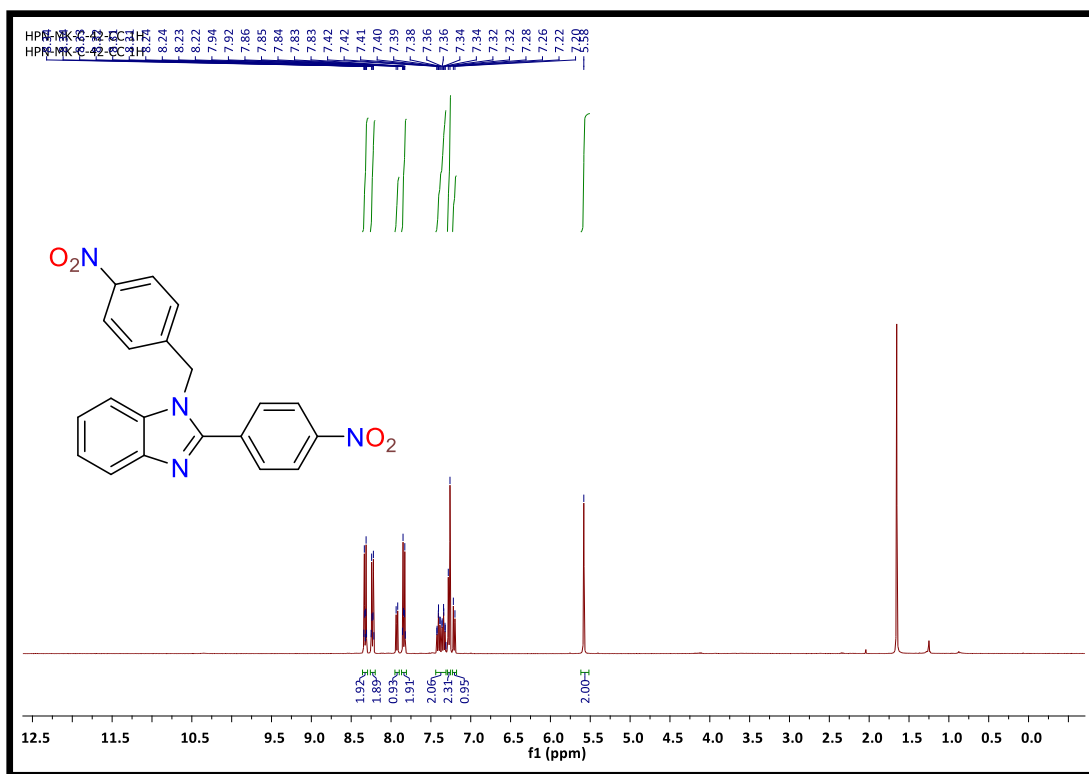

**Figure S54:**  $^1\text{H}$  NMR (400 MHz,  $\text{CDCl}_3$ ) spectrum of 2g.

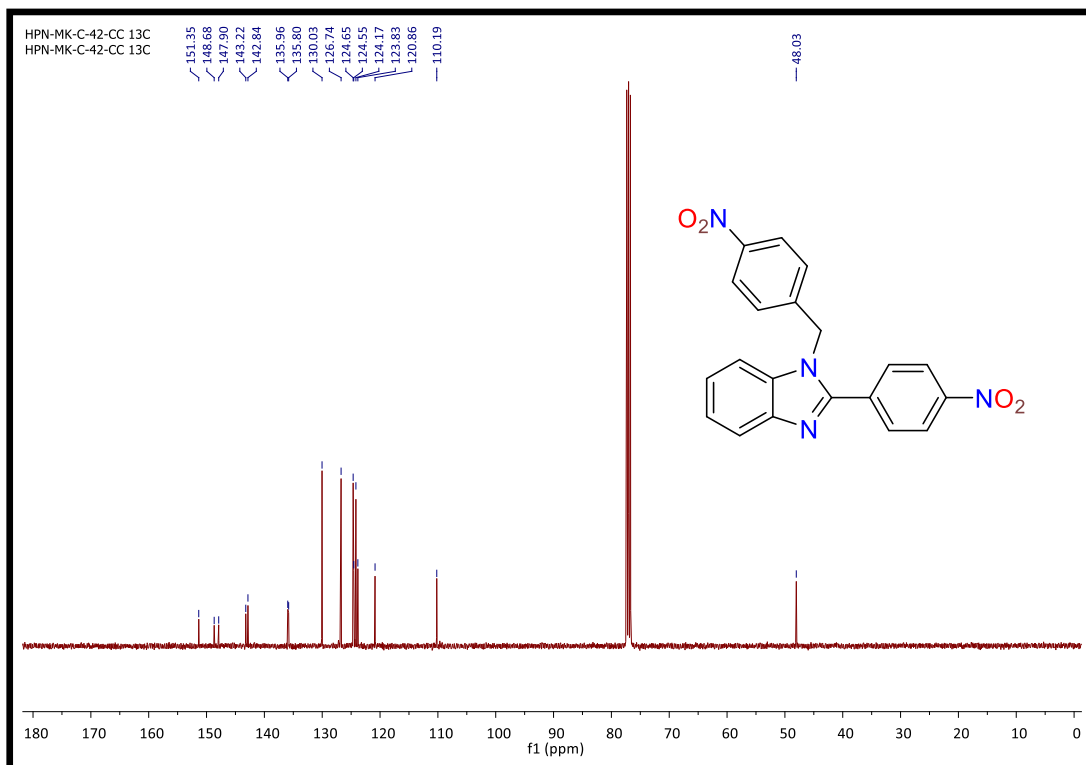

**Figure S55:**  $^{13}\text{C}\{^1\text{H}\}$  NMR (100 MHz,  $\text{CDCl}_3$ ) spectrum of 2g.

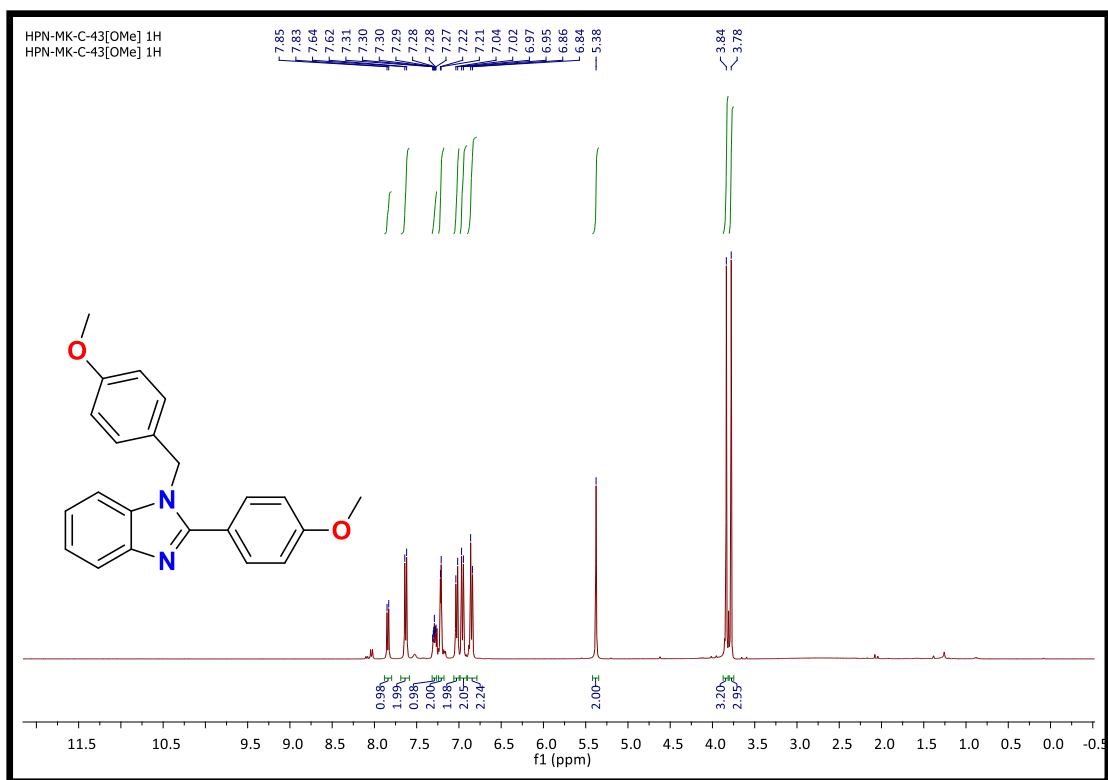

Figure 56:  $^1\text{H}$  NMR (400 MHz,  $\text{CDCl}_3$ ) spectrum of 2h.

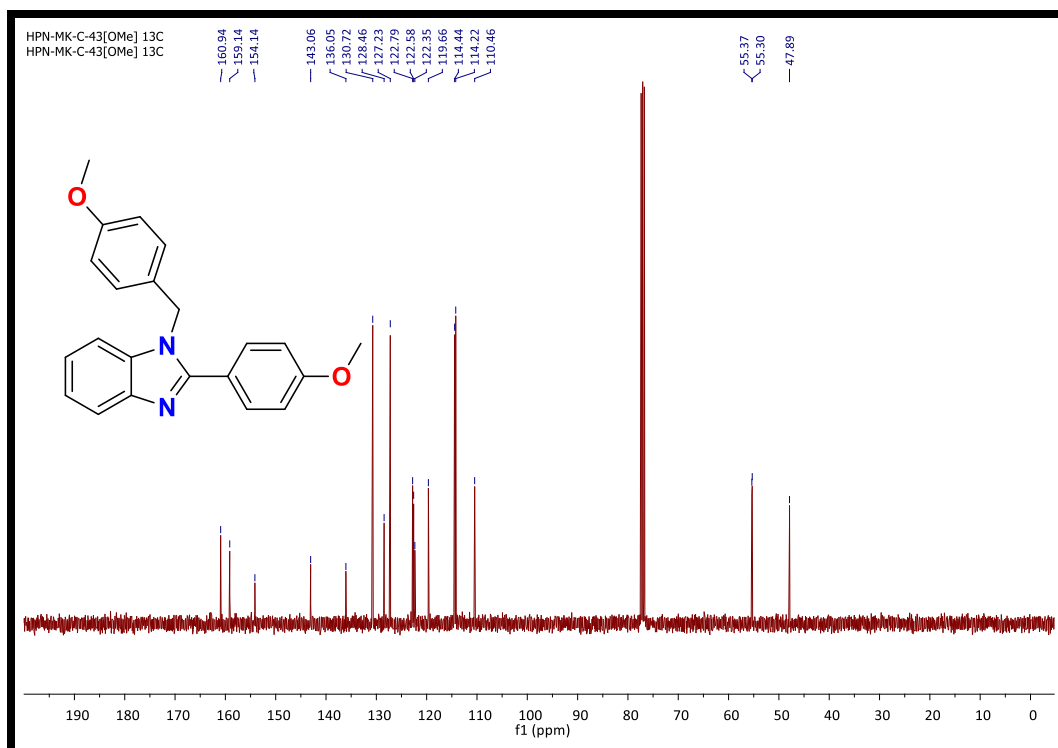

Figure 57:  $^{13}\text{C}\{^1\text{H}\}$  NMR (100 MHz,  $\text{CDCl}_3$ ) spectrum of 2h.

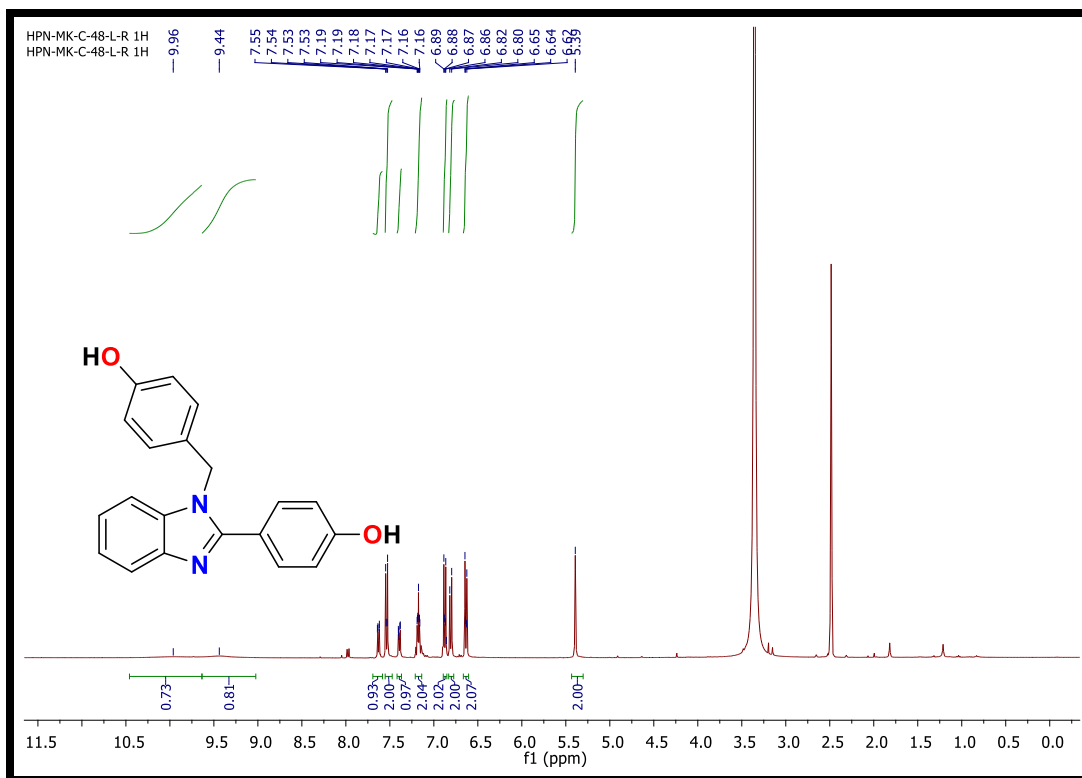

Figure 58:  $^1\text{H}$  NMR (400 MHz,  $\text{DMSO-d}_6$ ) spectrum of **2i**.

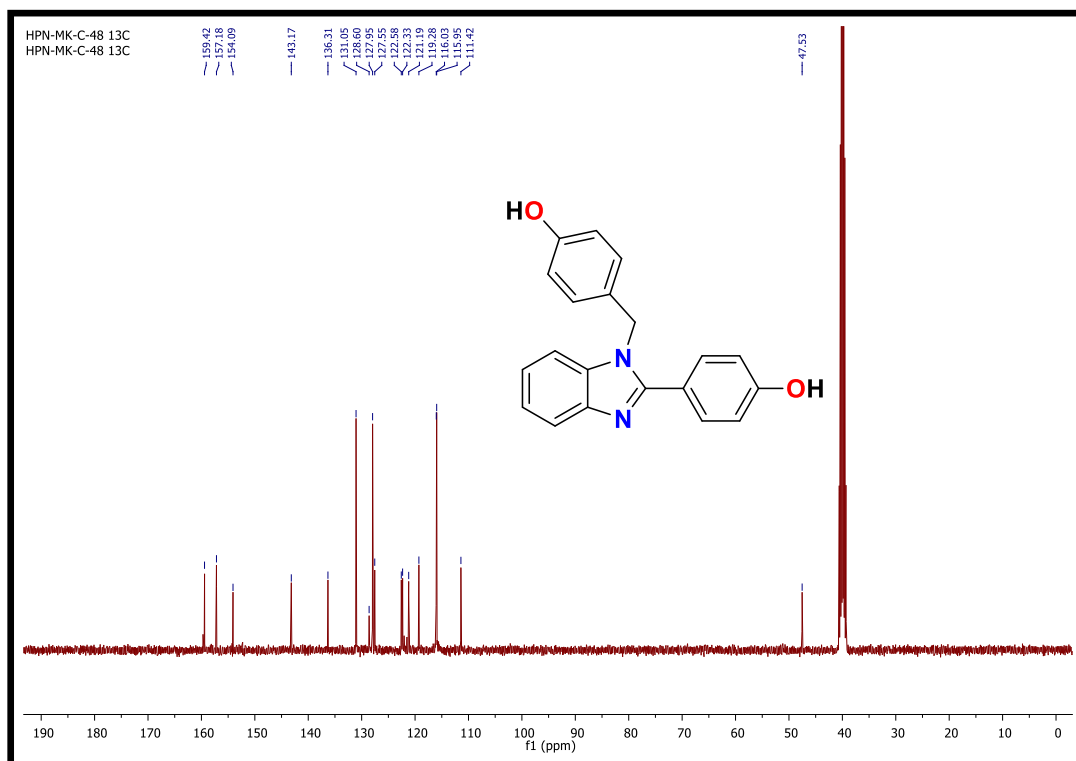

Figure 59:  $^{13}\text{C}\{^1\text{H}\}$  NMR (100 MHz,  $\text{DMSO-d}_6$ ) spectrum of **2i**.

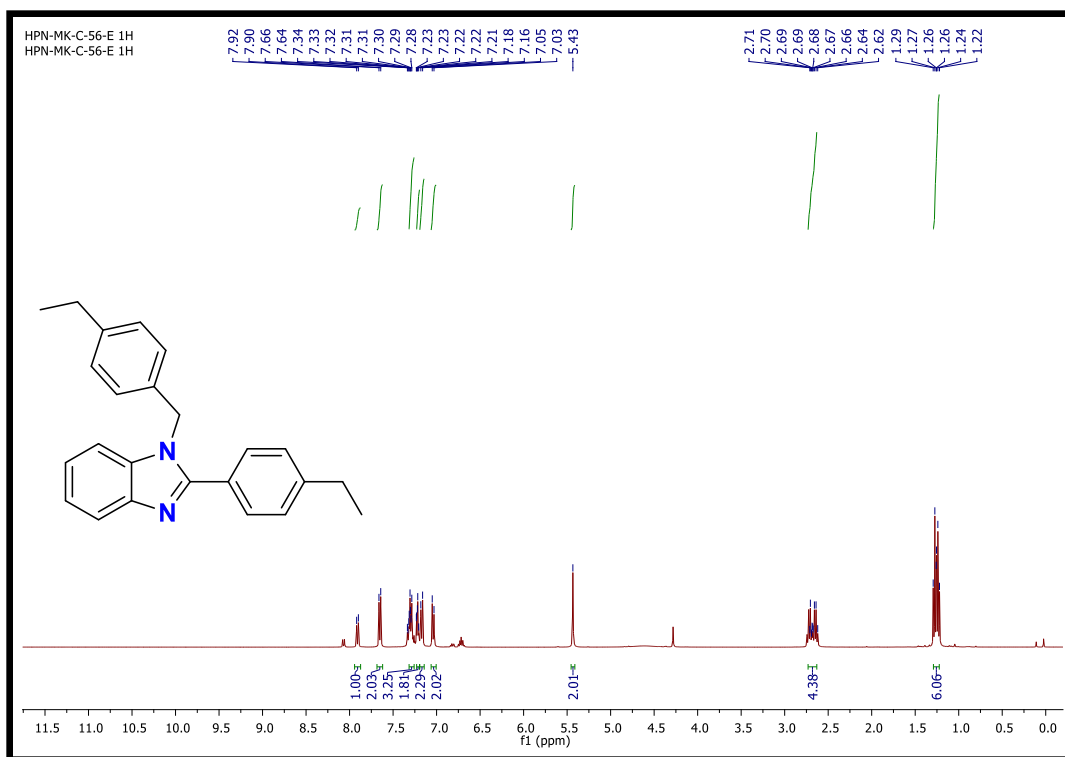

**Figure S60:**  $^1\text{H}$  NMR (400 MHz,  $\text{CDCl}_3$ ) spectrum of **2j**.

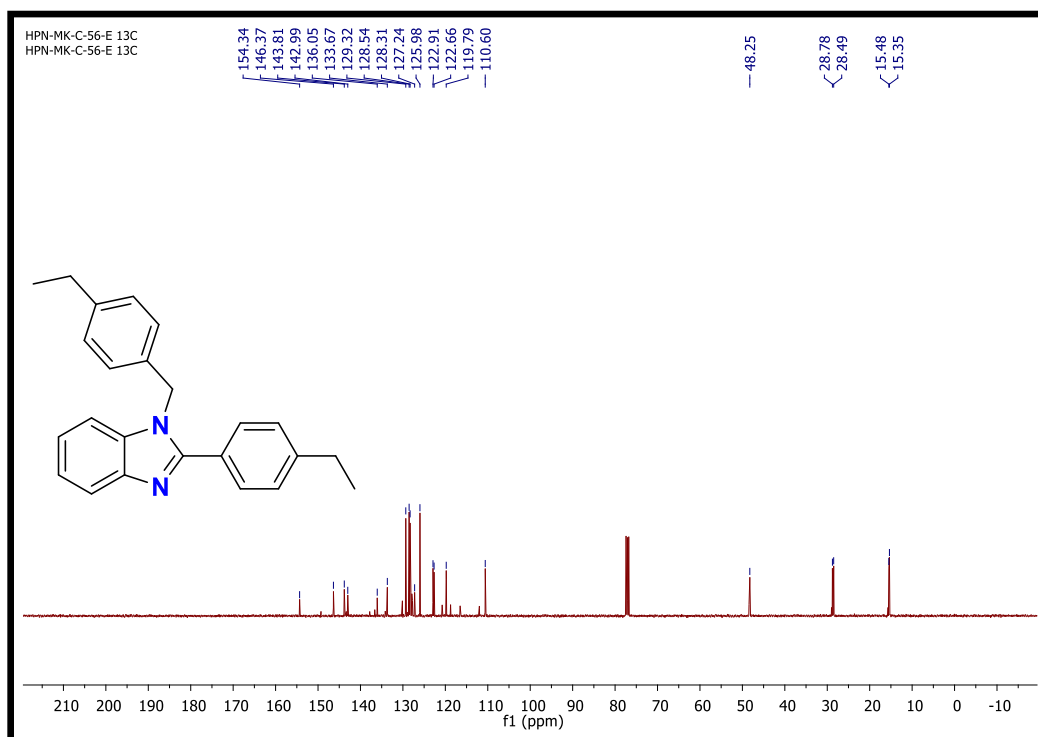

**Figure S61:**  $^{13}\text{C}\{^1\text{H}\}$  NMR (100 MHz,  $\text{CDCl}_3$ ) spectrum of **2j**.



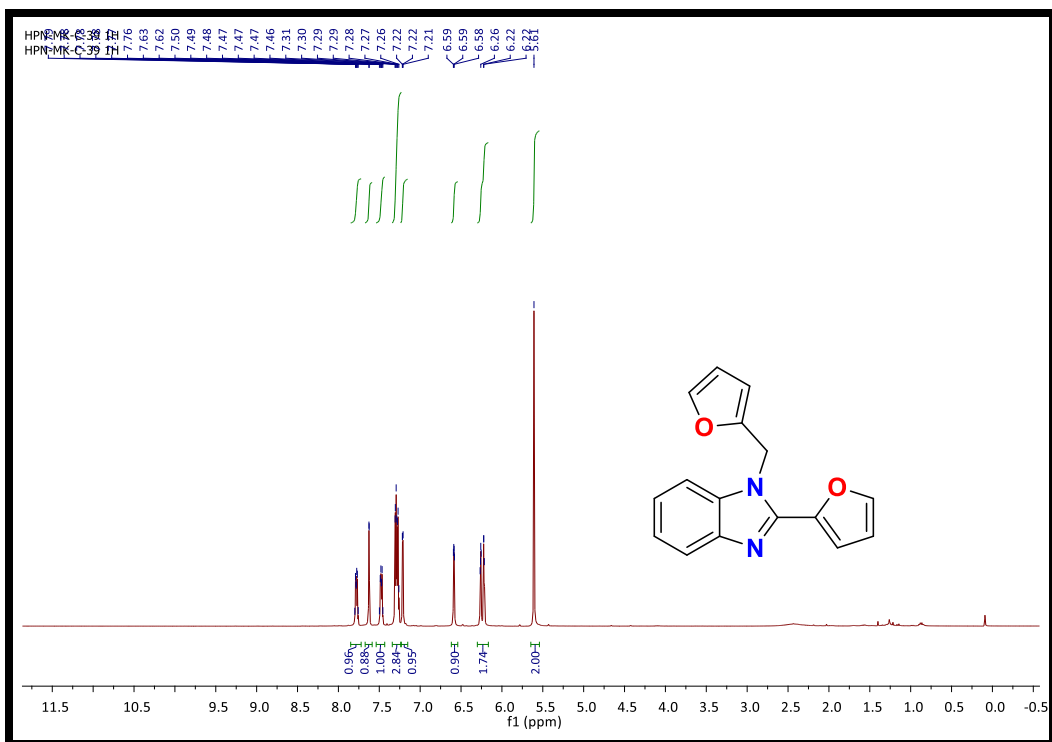

Figure S62:  $^1\text{H}$  NMR (400 MHz,  $\text{CDCl}_3$ ) spectrum of **2k**.

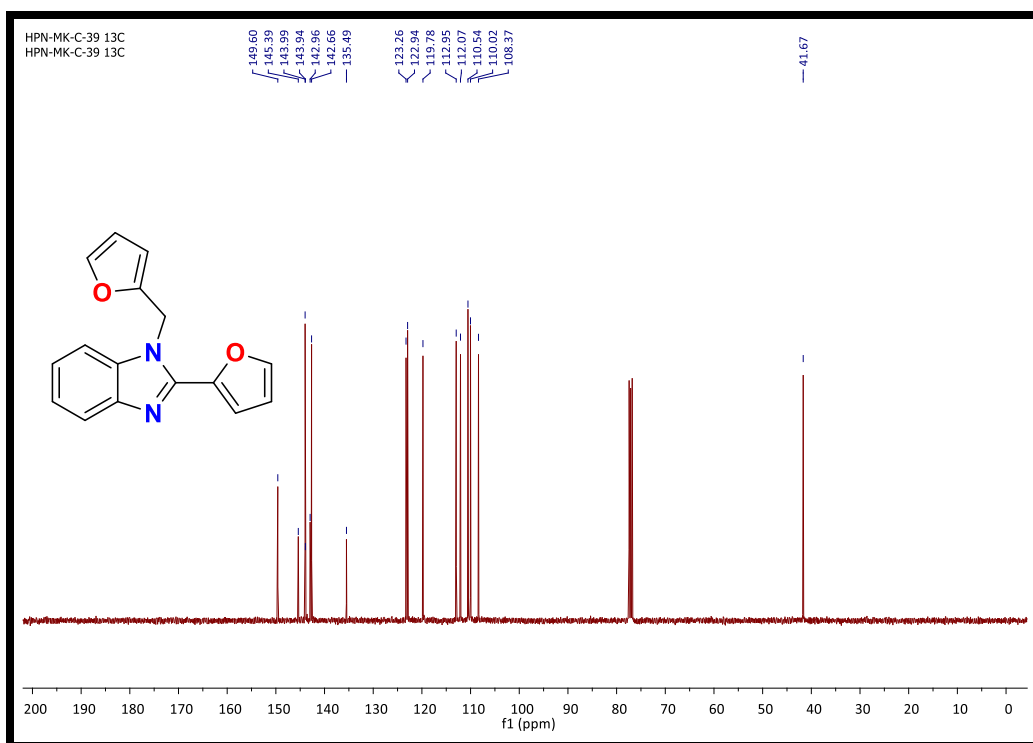

Figure S63:  $^{13}\text{C}\{^1\text{H}\}$  NMR (100 MHz,  $\text{CDCl}_3$ ) spectrum of **2K**.

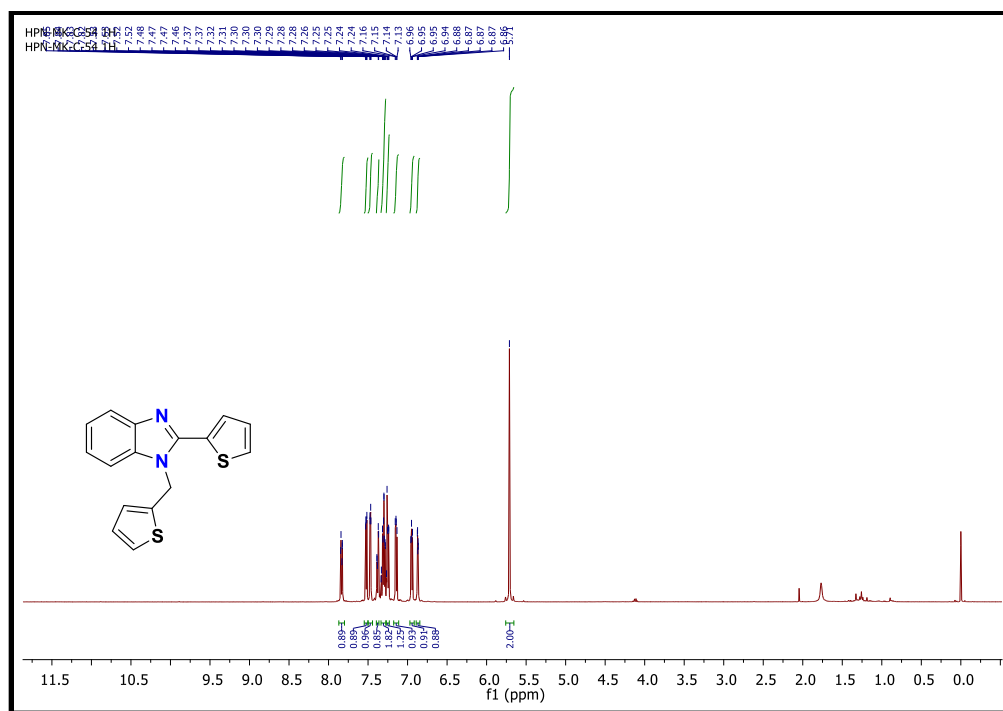

Figure S64:  $^1\text{H}$  NMR (400 MHz,  $\text{CDCl}_3$ ) spectrum of **2l**.

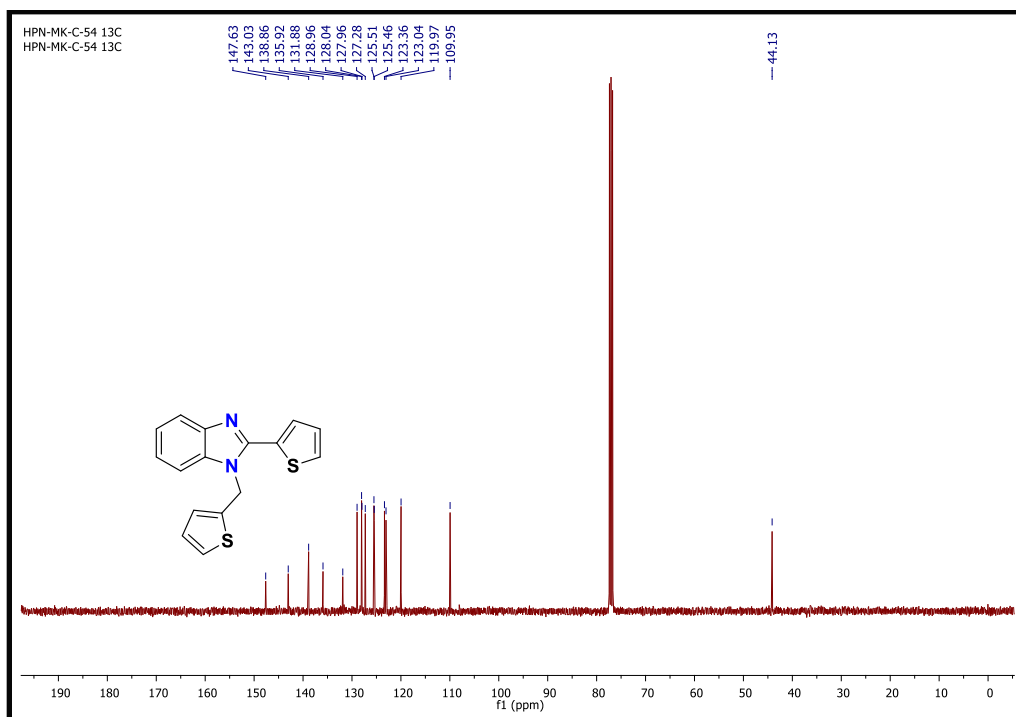

Figure S65:  $^{13}\text{C}\{^1\text{H}\}$  NMR (100 MHz,  $\text{CDCl}_3$ ) spectrum of **2l**.

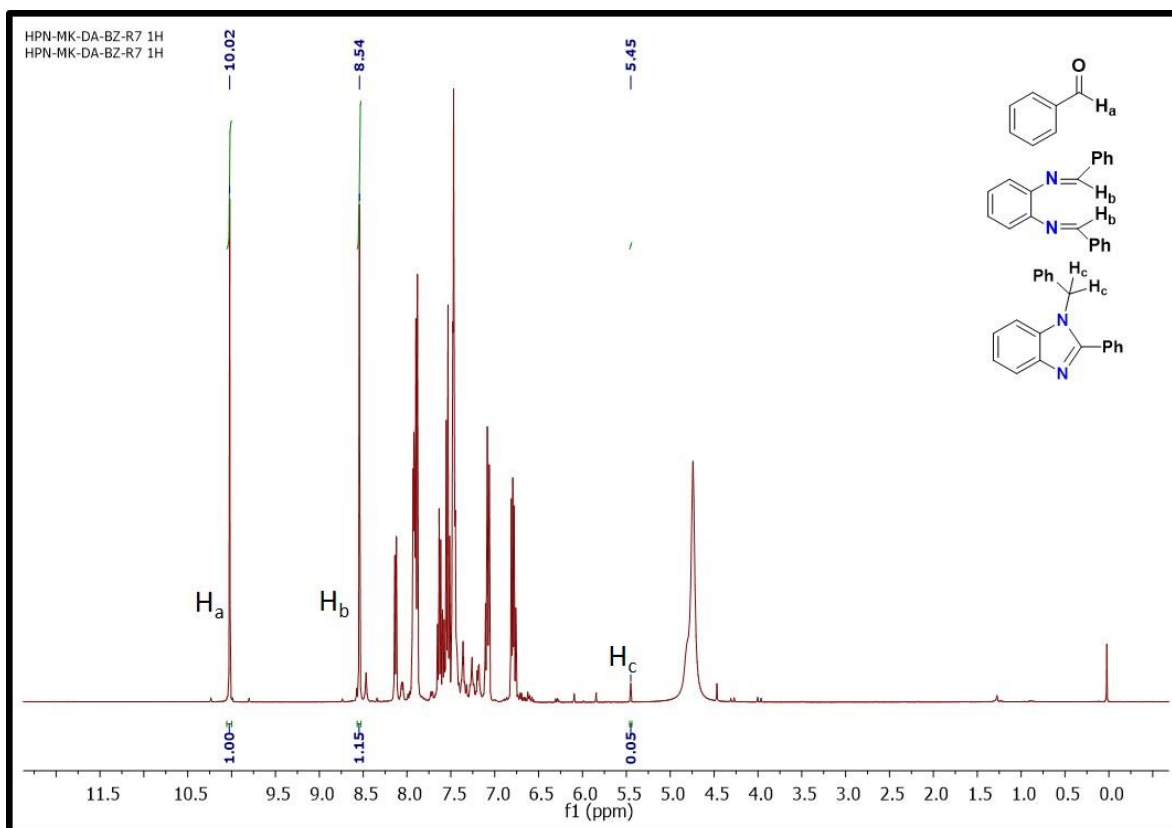

**Figure S66:** <sup>1</sup>H NMR spectrum of the reaction mixture obtained by reacting *o*-phenylenediamine and benzaldehyde in the absence of the catalyst at 60 °C in CDCl<sub>3</sub>. The spectrum was recorded within 30 minutes of adding the reactants.

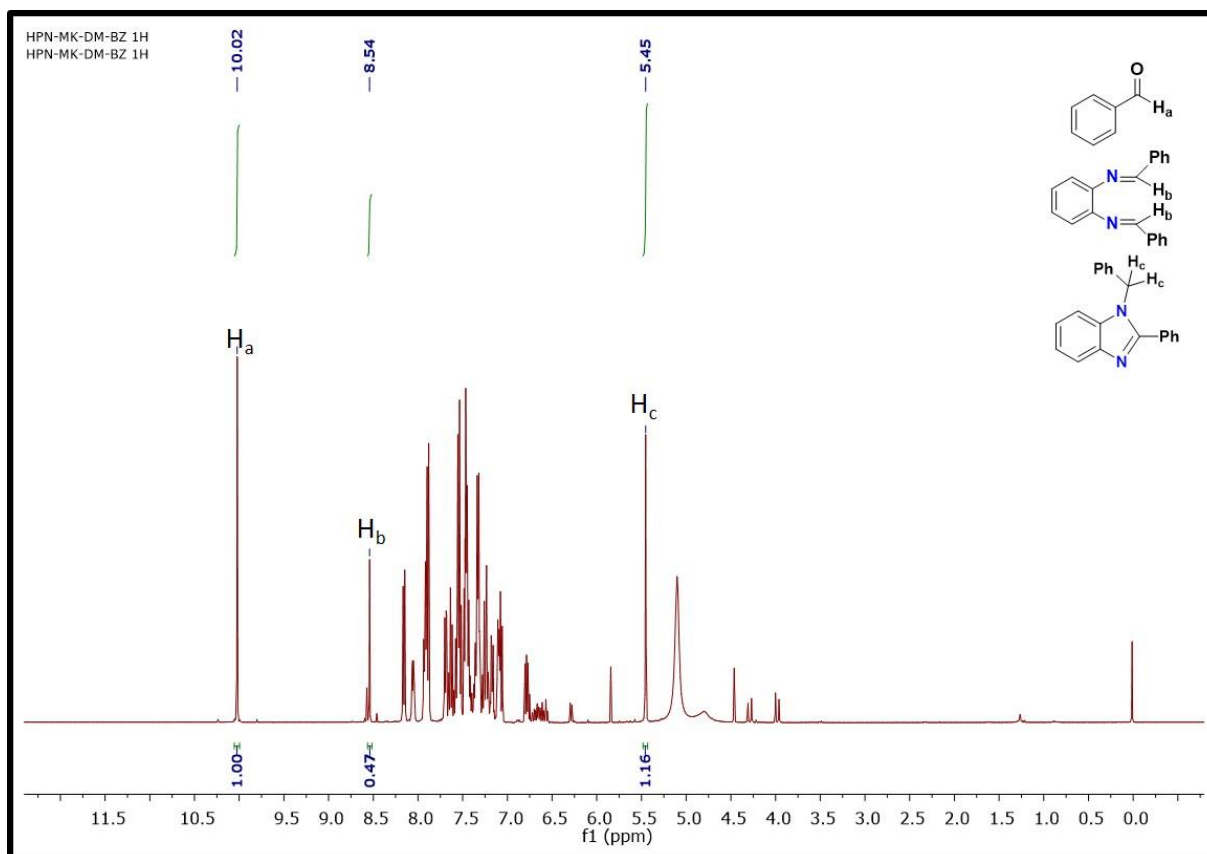

**Figure S67:**  $^1\text{H}$  NMR spectrum of the reaction mixture obtained by reacting *o*-phenylenediamine and benzaldehyde in presence of the pro ligand **H<sub>3</sub>L** at 60 °C in  $\text{CDCl}_3$ . The spectrum was recorded within 30 minutes of adding the reactants.

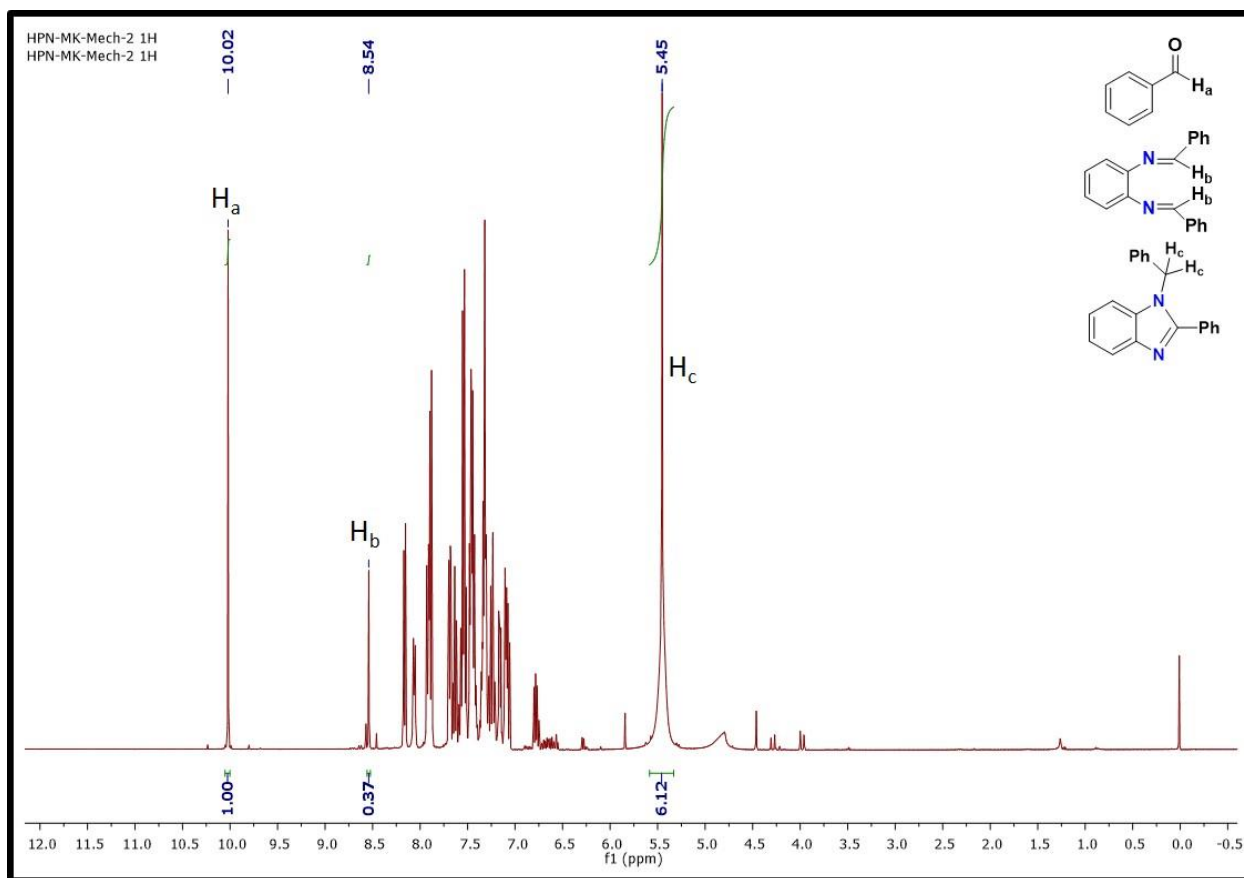

**Figure S68:**  $^1\text{H}$  NMR spectrum of the reaction mixture obtained by reacting *o*-phenylenediamine and benzaldehyde in presence of compound **1** at 60 °C in  $\text{CDCl}_3$ . The spectrum was recorded within 30 minutes of adding the reactants.

#### References:

1. O. V. Dolomanov, L. J. Bourhis, R. J. Gildea, J. A. K. Howard and H. Puschmann, *J. Appl. Crystal.*, **2009**, *42*, 339-341.
2. G. Sheldrick, *Acta Crystallogr. A*, **2015**, *71*, 3-8.
3. G. Sheldrick, *Acta Crystallogr. A*, **2008**, *64*, 112-122.
4. N. Herrera Cano, J. G. Uranga, M. Nardi, A. Procopio, D. A. Wunderlin and A. N. Santiago, *Beilstein J. Org. Chem.* **2016**, *12*, 2410-2419.
5. P. Wang, J. Wang, C. Au, R. Qiu, X. Xu, S. Yin, *Adv. Synth. Catal.* **2016**, *358*, 1302 – 1308.
6. X. Sang, X. Hu, R. Tao, Y. Zhang, H. Zhu, D. Wang, *ChemPlusChem*, **2020**, *85*, 123.
7. Fu, J., Yue, Y., Liu, K. *Mol Divers*, **2023**, *7*, 873–887.
8. Rajesh Chebolu, Damodara N. Kommi, Dinesh Kumar, Narendra Bollineni, and Asit K. Chakraborti, *J. Org. Chem.* **2012**, *77* (22), 10158-10167.
